# Supplementary material
Source: PubMed Central journal article supplement (PMC4261600)
Supplement: NIHMS61388-supplement-SuppInformation.pdf [file NIHMS61388-supplement-SuppInformation.pdf]

## SUPPLEMENTARY INFORMATION

**Supplementary Figure S1:** Linear regression analysis of the three SILAC biological replicate experiments. Normalized protein ratios were compared across each of the three replicate experiments. Each scatter-plot only included protein ratios common to both experiments with at least three ratio counts per experiment. Biological Replicate One versus Two:  $r^2 = 0.7385$ ; Biological Replicate One versus Three:  $r^2 = 0.8142$ ; Biological Replicate Two versus Three:  $r^2 = 0.8589$ .

**Supplementary Figure S2:** Western blot validation of differentially expressed SILAC proteins. A selection of proteins found to be differentially expressed within the SILAC analysis were confirmed by Western blotting. Shown are SILAC fold changes and corresponding immunoblots for the following proteins: Mcm2, Mcm7, PCNA, ribosomal protein S6, ferritin heavy chain (FTH1), NDRG1, p16 (CDKN2A), GPX1, and beta-actin.

**Supplementary Figures S3 – S12:** Individual IPA canonical pathways which were found to be over-represented in the Cdc7 depletion dataset (corresponding to Table 2). Molecules coloured in green were down-regulated in abundance following Cdc7 depletion, molecules coloured red were up-regulated and molecules coloured grey were unchanged in abundance. Uncoloured molecules were not quantified in this SILAC analysis. A key is given to explain the shapes of molecules.

Supplementary Figure S3: NRF2-mediated Oxidative Stress Response

Supplementary Figure S4: Synthesis and Degradation of Ketone Bodies

Supplementary Figure S5: Butanoate Metabolism

Supplementary Figure S6: Bile Acid Biosynthesis

Supplementary Figure S7: Valine, Leucine and Isoleucine Degradation

Supplementary Figure S8: Biosynthesis of Steroids

Supplementary Figure S9: Granzyme A Signalling

Supplementary Figure S10: Oxidative Phosphorylation

Supplementary Figure S11: Glutathione Metabolism

Supplementary Figure S12: Propanoate Metabolism

**Supplementary Table S1:** Protein information for each of the 315 differentially expressed proteins including various identifiers, functional annotations, number of sequenced peptides, sequence coverage, predicted molecular weight, sequence length, posterior error probability (PEP) score, normalized protein abundance ratio, Significance B score, ratio count, ratio variability and summed peptide intensity. Additionally, this table provides further information for all sequenced peptides within each Protein Group, including peptide sequence, whether the peptide was unique, how many ratio counts were obtained for each sequenced peptide as well as individual peptide scores and ratios.

**Supplementary Table S2:** Protein information for all 1730 proteins which were quantified but found to be unchanged in abundance following Cdc7 depletion (Significance B > 0.05).

**Supplementary Table S3:** Protein names, HUGO gene symbols, fold changes and p-values for all molecules mapped to each of the ten top-scoring IPA pathways (corresponding to Table 2 and

Supplementary Figures S3 - S12). Significantly changed proteins are shown in bold red and unchanged identified proteins are in black.

**Supplementary Table S4:** GO enrichment annotation data for up and down regulated protein groups (corresponding to information in Table 3). Each GO category (GOBP, GOCC and GOMF) was processed separately. Shown are the top scoring 10 annotations for each category, with corresponding GO-ID reference number, number of proteins found to be associated with each term (x), p-value, corrected p-value, cluster size of dataset, number of available molecules per term and a list of all proteins identified within each term.

**Supplementary Table S5:** Generic GOSlim enrichment annotation data for up and down regulated protein groups (represented graphically in Figure 4). Shown are the top scoring 10 annotations for each category, with corresponding GO-ID reference number, number of proteins found to be associated with each term (x), p-value, corrected p-value, cluster size of dataset, number of available molecules per term and a list of all proteins identified within each term.

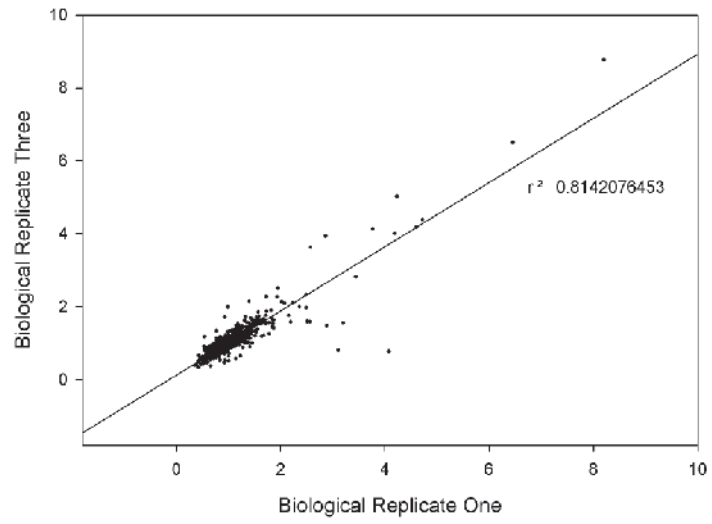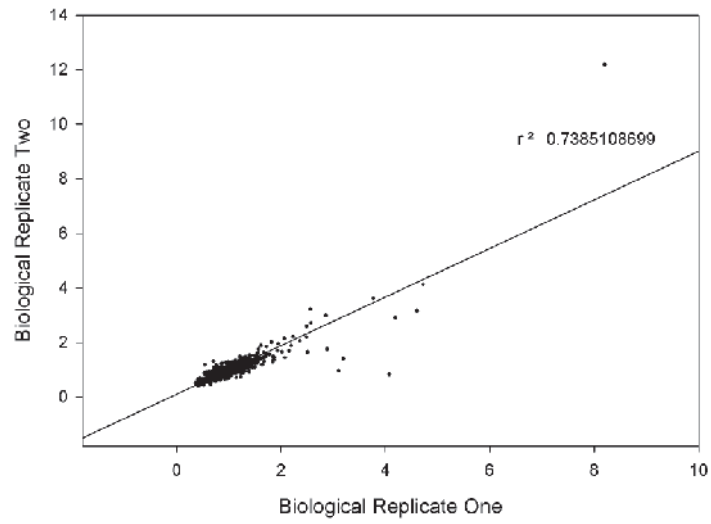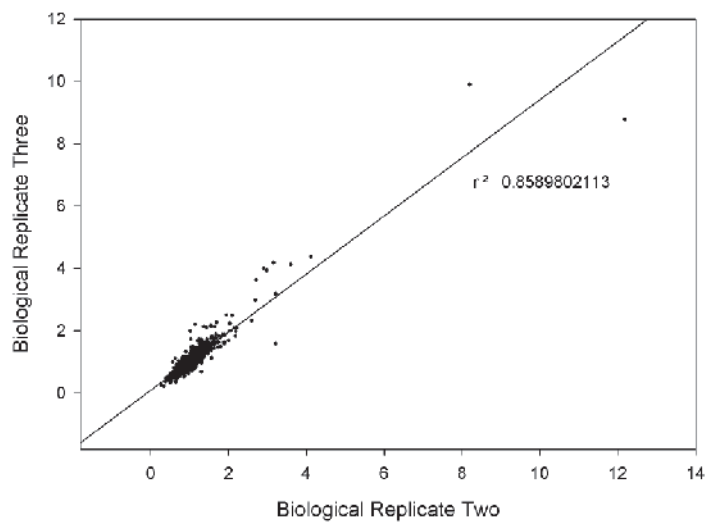

SUPPLEMENTARY FIGURE S1

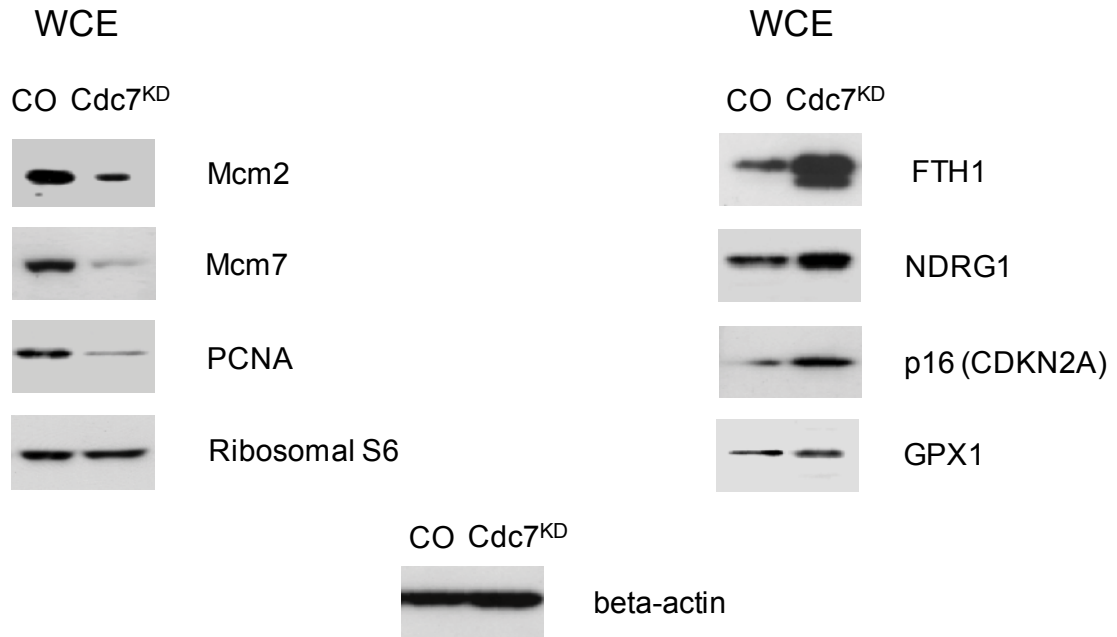

| Protein Name                                                                                                                                                                                                                                                                                        | Gene Name     | Normalized SILAC Ratio (Cdc7 <sup>KD</sup> / CO) | Fold Change  | Ratio Significance (B) |
|-----------------------------------------------------------------------------------------------------------------------------------------------------------------------------------------------------------------------------------------------------------------------------------------------------|---------------|--------------------------------------------------|--------------|------------------------|
| DNA replication licensing factor MCM2;Minichromosome maintenance protein 2 homolog;Nuclear protein BM28                                                                                                                                                                                             | <b>MCM2</b>   | 0.66578                                          | <b>-1.50</b> | 0.048311               |
| DNA replication licensing factor MCM7;CDC47 homolog;P1.1-MCM3;cDNA FLJ30817 fis, clone FEBRA2001581, highly similar to DNA REPLICATION LICENSING FACTOR MCM7;MCM7 minichromosome maintenance deficient 7 (S. cerevisiae);MCM7 minichromosome maintenance deficient 7 (S. cerevisiae), isoform CRA_a | <b>MCM7</b>   | 0.56455                                          | <b>-1.77</b> | 0.0092728              |
| Proliferating cell nuclear antigen;Cyclin                                                                                                                                                                                                                                                           | <b>PCNA</b>   | 0.52672                                          | <b>-1.90</b> | 2.98E-05               |
| 40S ribosomal protein S6;Phosphoprotein NP33;Ribosomal protein S6;Ribosomal protein S6, isoform CRA_a                                                                                                                                                                                               | <b>RPS6</b>   | 0.68759                                          | <b>-1.45</b> | 0.010506               |
| Ferritin heavy chain;Cell proliferation-inducing gene 15 protein;Ferritin                                                                                                                                                                                                                           | <b>FTH1</b>   | 3.6533                                           | <b>+3.65</b> | 8.09E-08               |
| Protein NDRG1;N-myc downstream-regulated gene 1 protein;Differentiation-related gene 1 protein;Reducing agents and tunicamycin-responsive protein;Nickel-specific induction protein Cap43;Rit42;cDNA FLJ39243 fis, clone OCBBF2008283, highly similar to Protein NDRG1                              | <b>NDRG1</b>  | 1.8103                                           | <b>+1.81</b> | 0.0073095              |
| Cyclin-dependent kinase inhibitor 2A, isoforms 1/2/3;Cyclin-dependent kinase 4 inhibitor A;p16-INK4a;Multiple tumor suppressor 1                                                                                                                                                                    | <b>CDKN2A</b> | 6.2537                                           | <b>+6.25</b> | 1.68E-09               |
| Glutathione peroxidase 1;GSHPx-1;Cellular glutathione peroxidase                                                                                                                                                                                                                                    | <b>GPX1</b>   | 2.1258                                           | <b>+2.12</b> | 0.00087102             |
| Beta-actin;Actin, cytoplasmic 1;Actin, cytoplasmic 1, N-terminally processed;cDNA FLJ58286, highly similar to Actin, cytoplasmic 2                                                                                                                                                                  | <b>ACTB</b>   | 0.89391                                          | <b>-1.12</b> | NS                     |

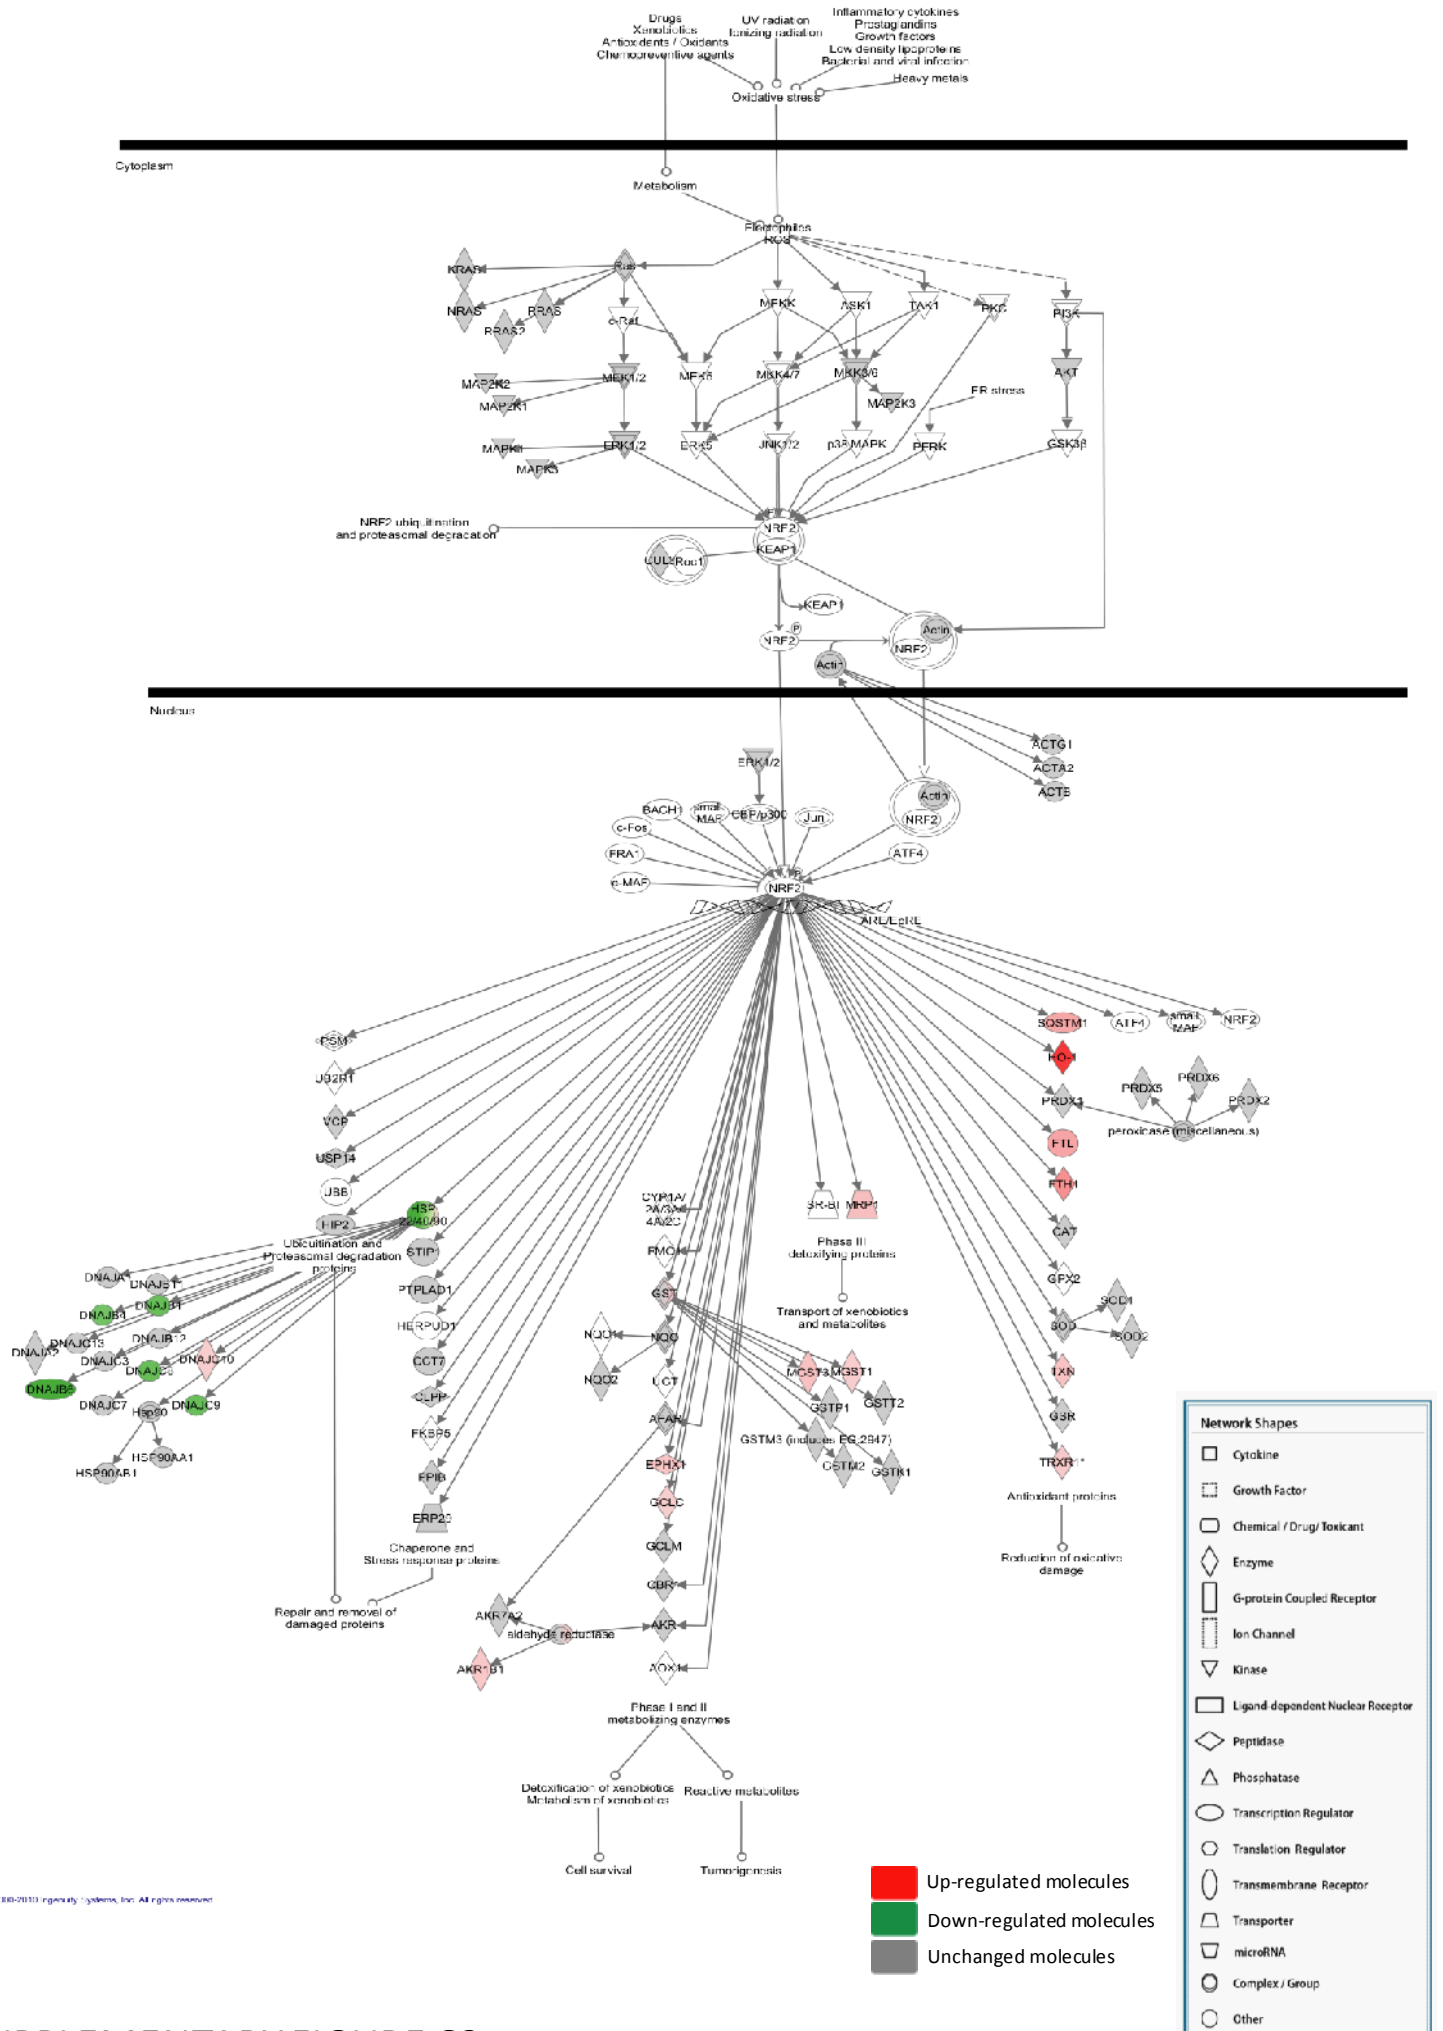

SUPPLEMENTARY FIGURE S3

Synthesis and Degradation of Ketone Bodies

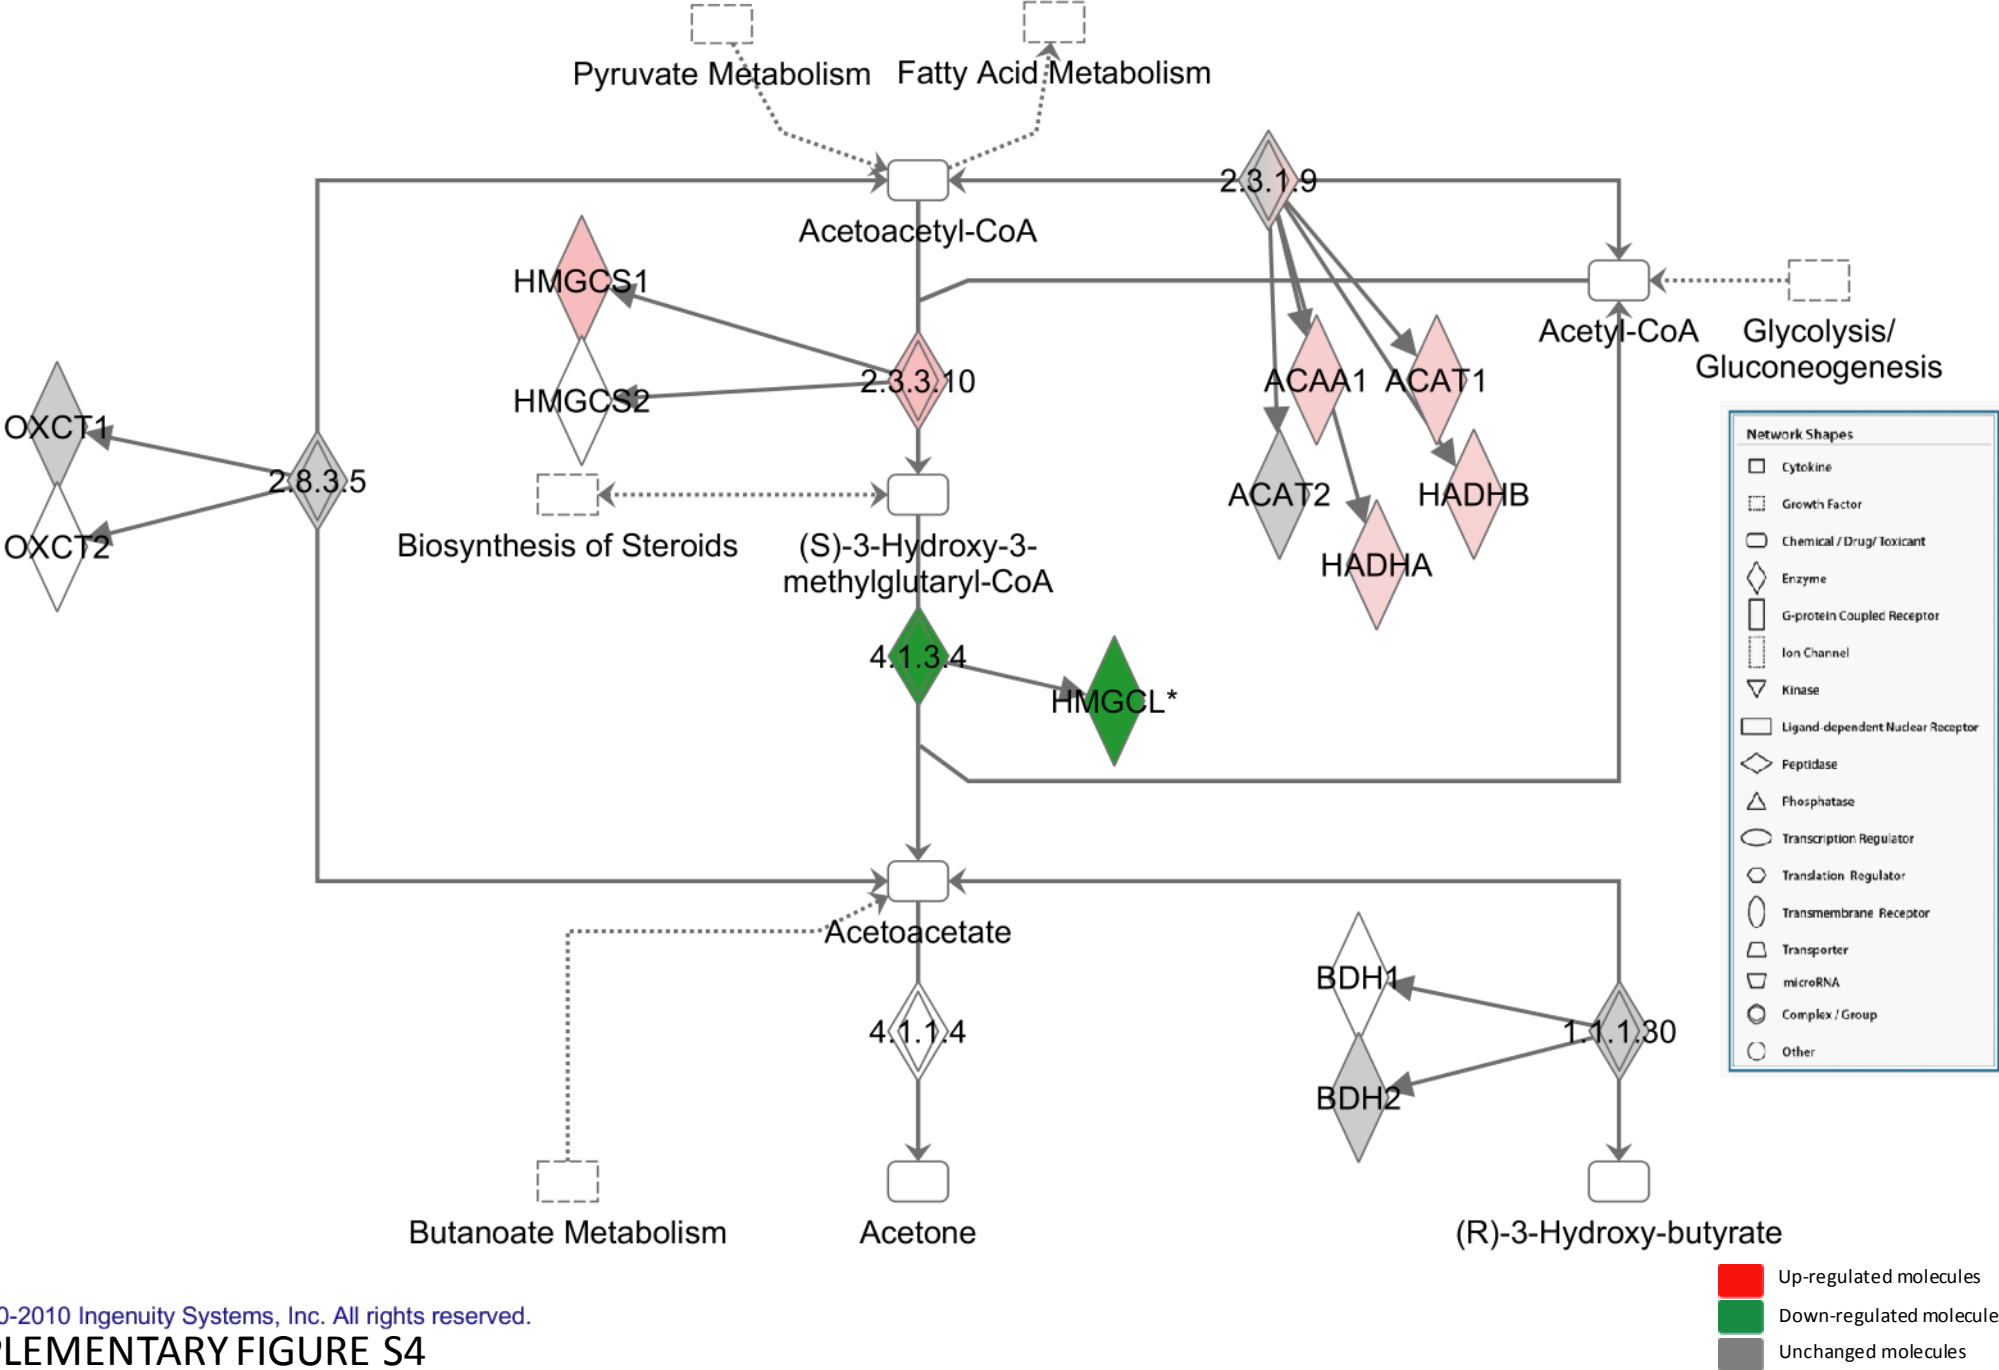

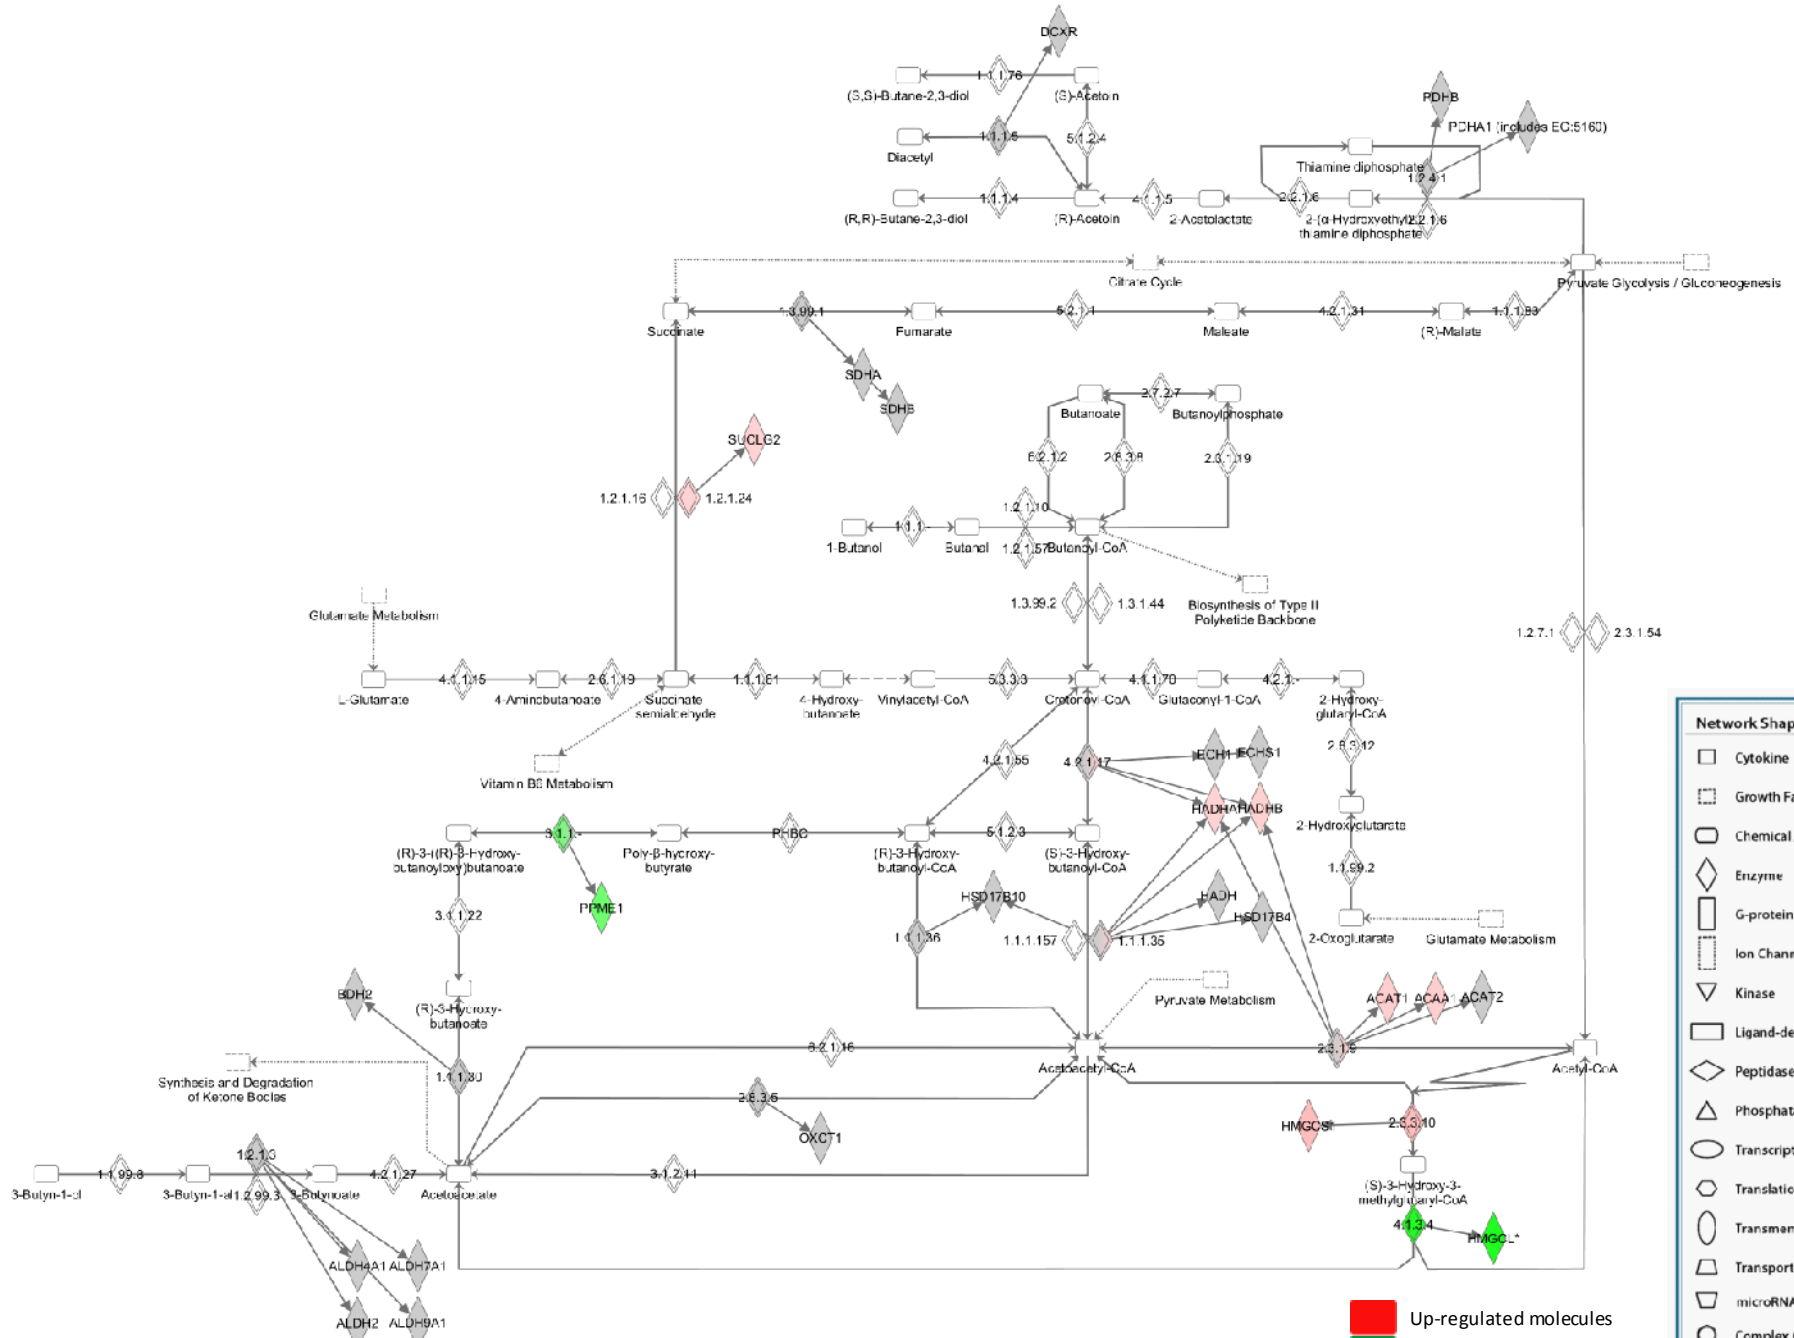

**Network Shapes**

- Cytokine
- Growth Factor
- Chemical / Drug / Toxicant
- Enzyme
- G-protein Coupled Receptor
- Ion Channel
- Kinase
- Ligand-dependent Nuclear Receptor
- Peptidase
- Phosphatase
- Transcription Regulator
- Translation Regulator
- Transmembrane Receptor
- Transporter
- microRNA
- Complex / Group
- Other

SUPPLEMENTARY FIGURE S5

© 2008-2010 Ingenuity Systems, Inc. All rights reserved.



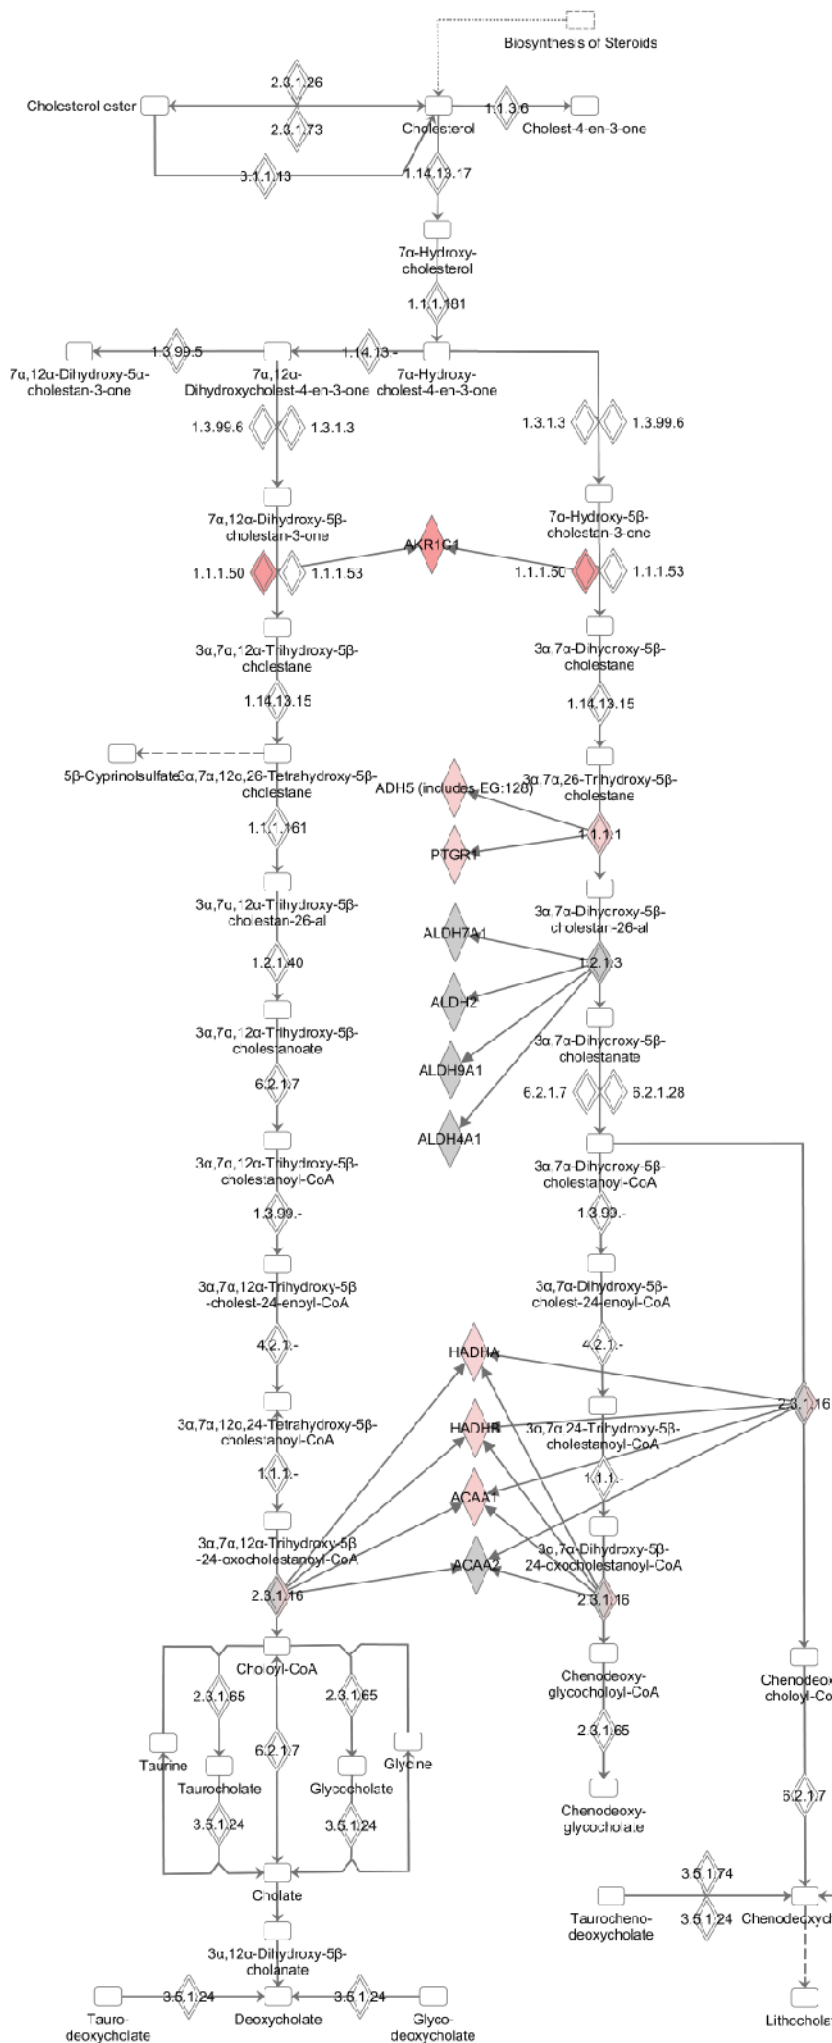

| Network Shapes            |                                   |
|---------------------------|-----------------------------------|
| [White Box]               | Cytokine                          |
| [Dotted Box]              | Growth Factor                     |
| [Grey Box]                | Chemical / Drug / Toxicant        |
| [Red Diamond]             | Enzyme                            |
| [White Box]               | G-protein Coupled Receptor        |
| [Dotted Box]              | Ion Channel                       |
| [White Diamond]           | Kinase                            |
| [White Box]               | Ligand-dependent Nuclear Receptor |
| [Red Diamond]             | Peptidase                         |
| [White Triangle]          | Phosphatase                       |
| [White Oval]              | Transcription Regulator           |
| [White Hexagon]           | Translation Regulator             |
| [White Oval]              | Transmembrane Receptor            |
| [White Triangle]          | Transporter                       |
| [White Inverted Triangle] | microRNA                          |
| [White Circle]            | Complex / Group                   |
| [White Circle]            | Other                             |

- Up-regulated molecules
- Down-regulated molecules
- Unchanged molecules

Valine, Leucine and Isoleucine Degradation

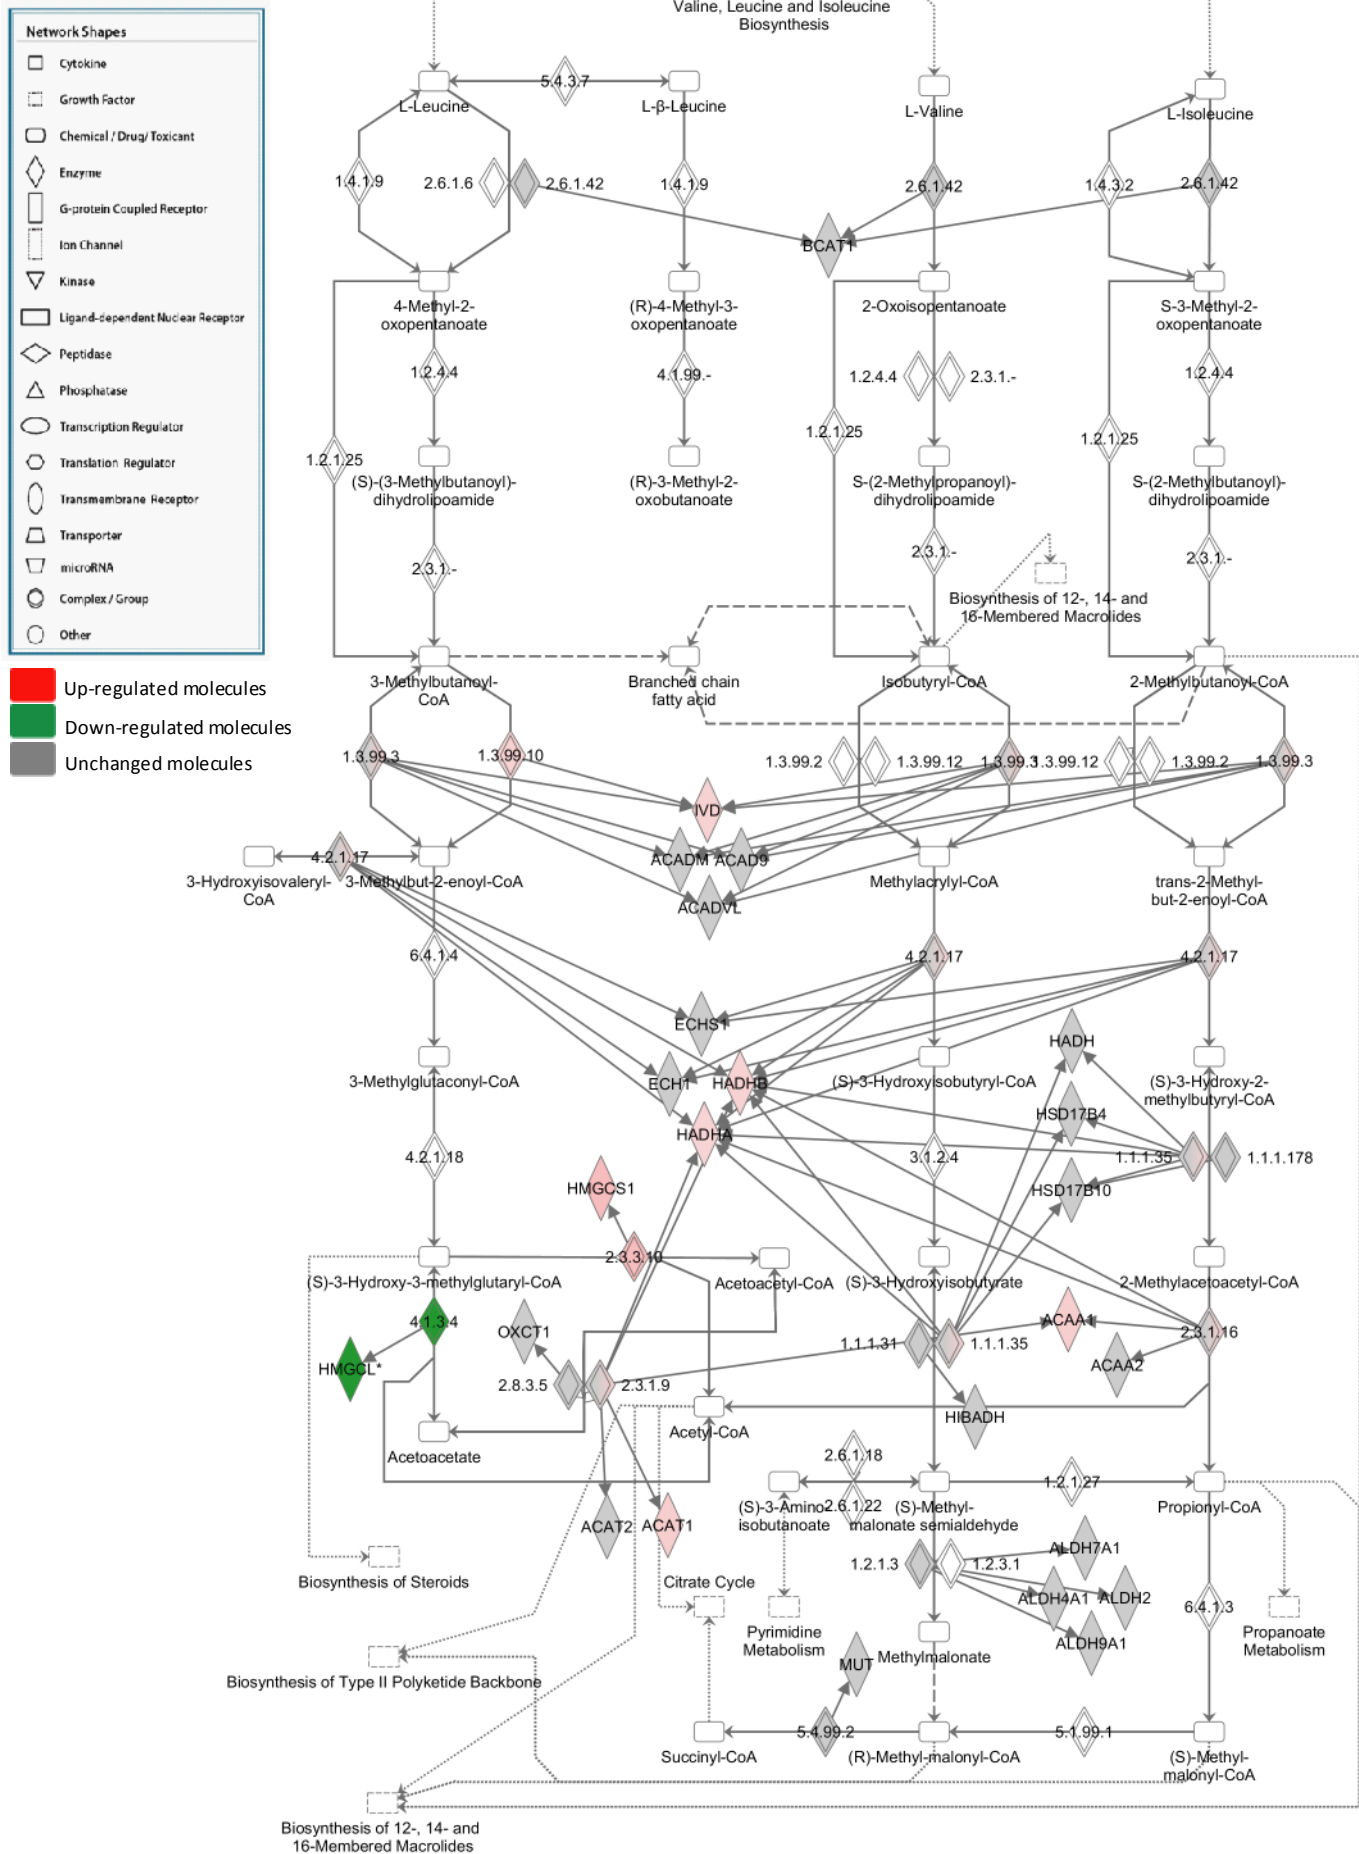

© 2000-2010 Ingenuity Systems, Inc. All rights reserved.

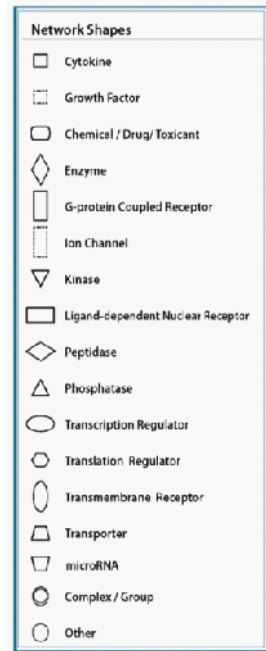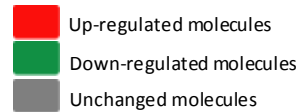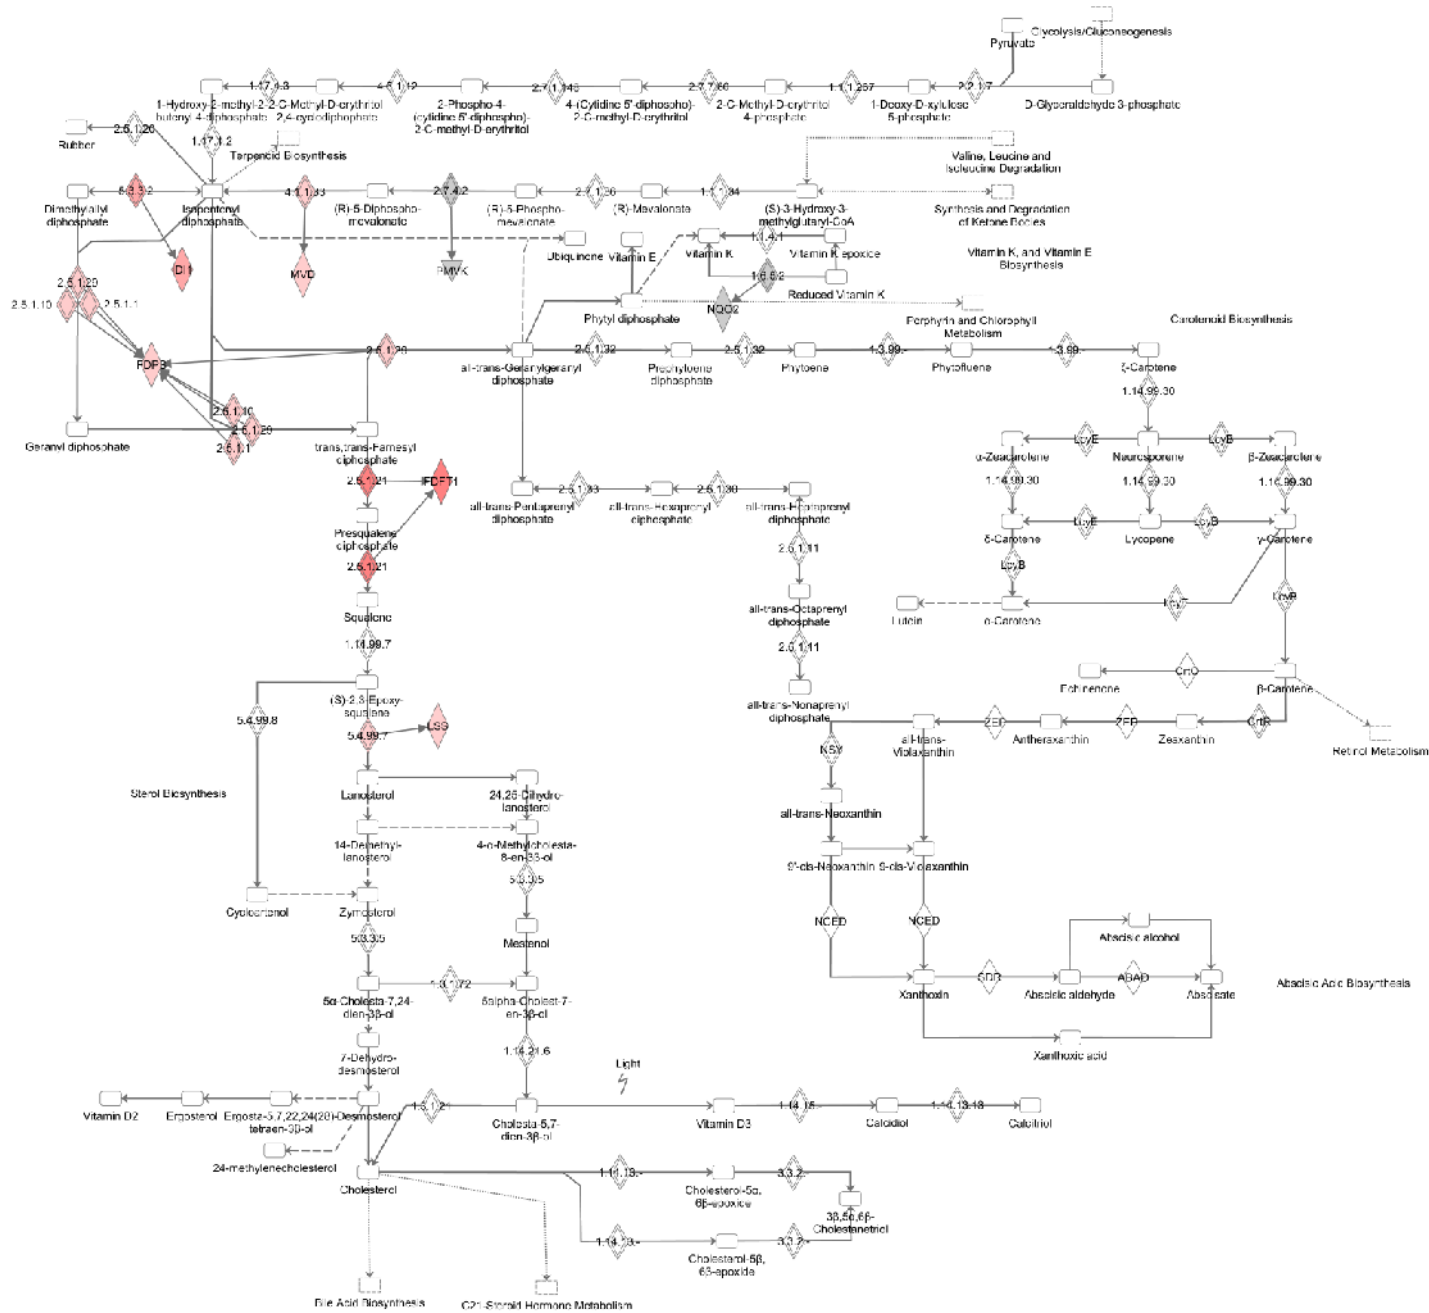

Granzyme A Signaling

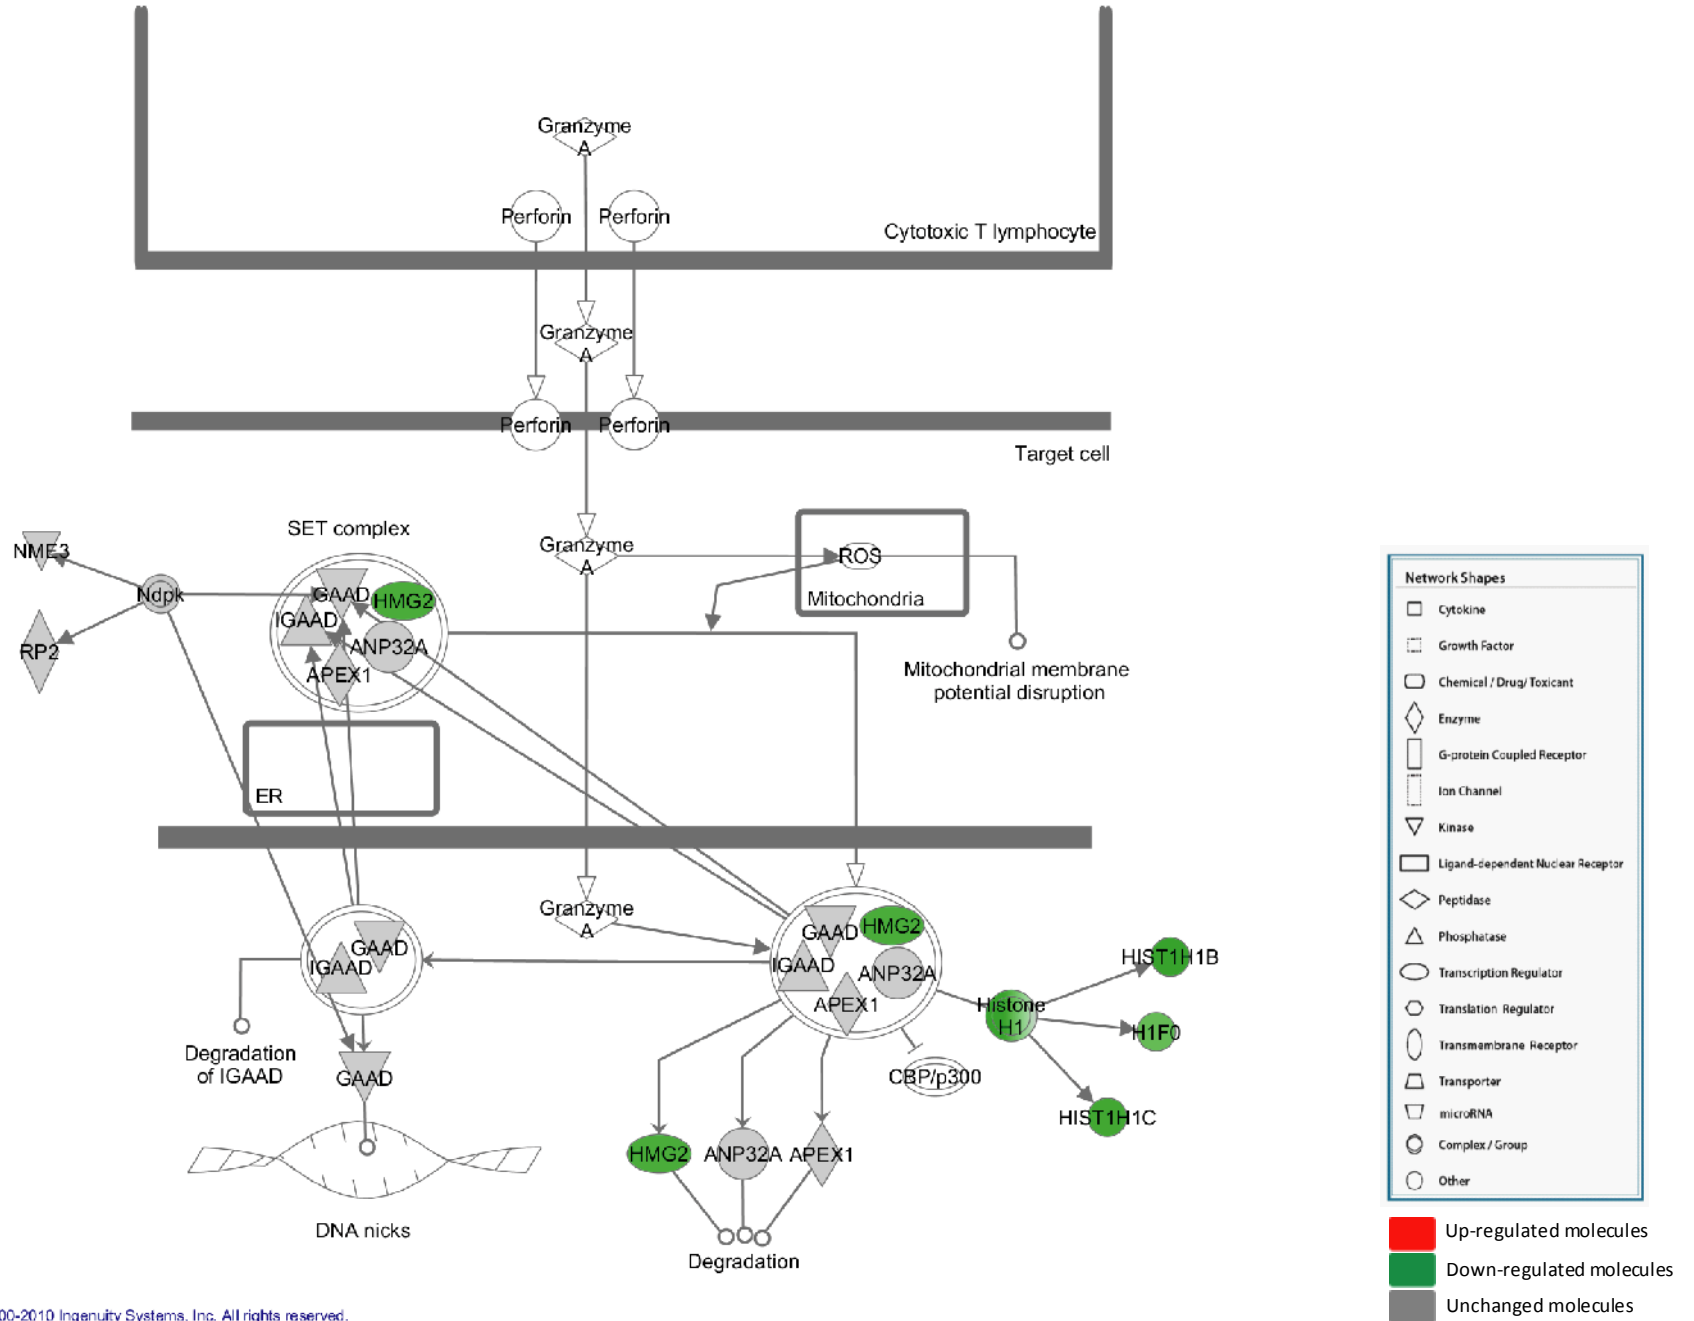

© 2000-2010 Ingnuity Systems, Inc. All rights reserved.

Oxidative Phosphorylation

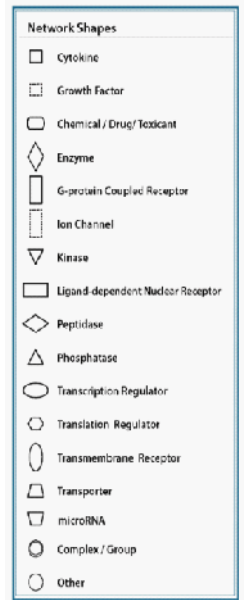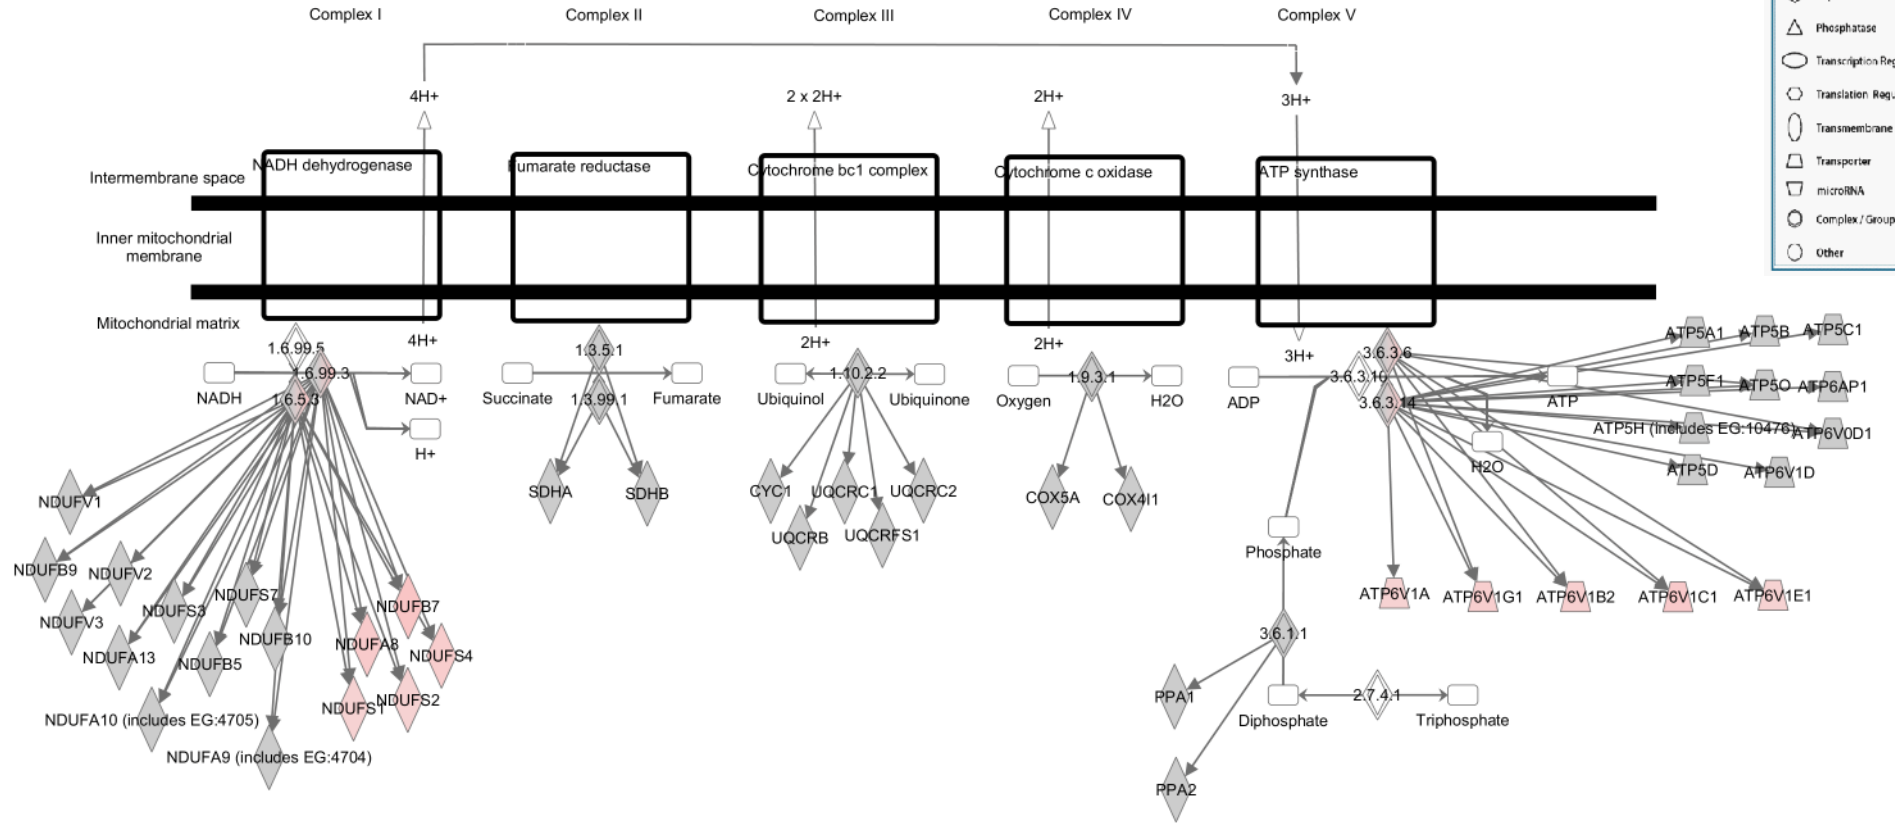

© 2000-2010 Ingenuity Systems, Inc. All rights reserved.

SUPPLEMENTARY FIGURE S10

- Up-regulated molecules
- Down-regulated molecules
- Unchanged molecules

Glutathione Metabolism

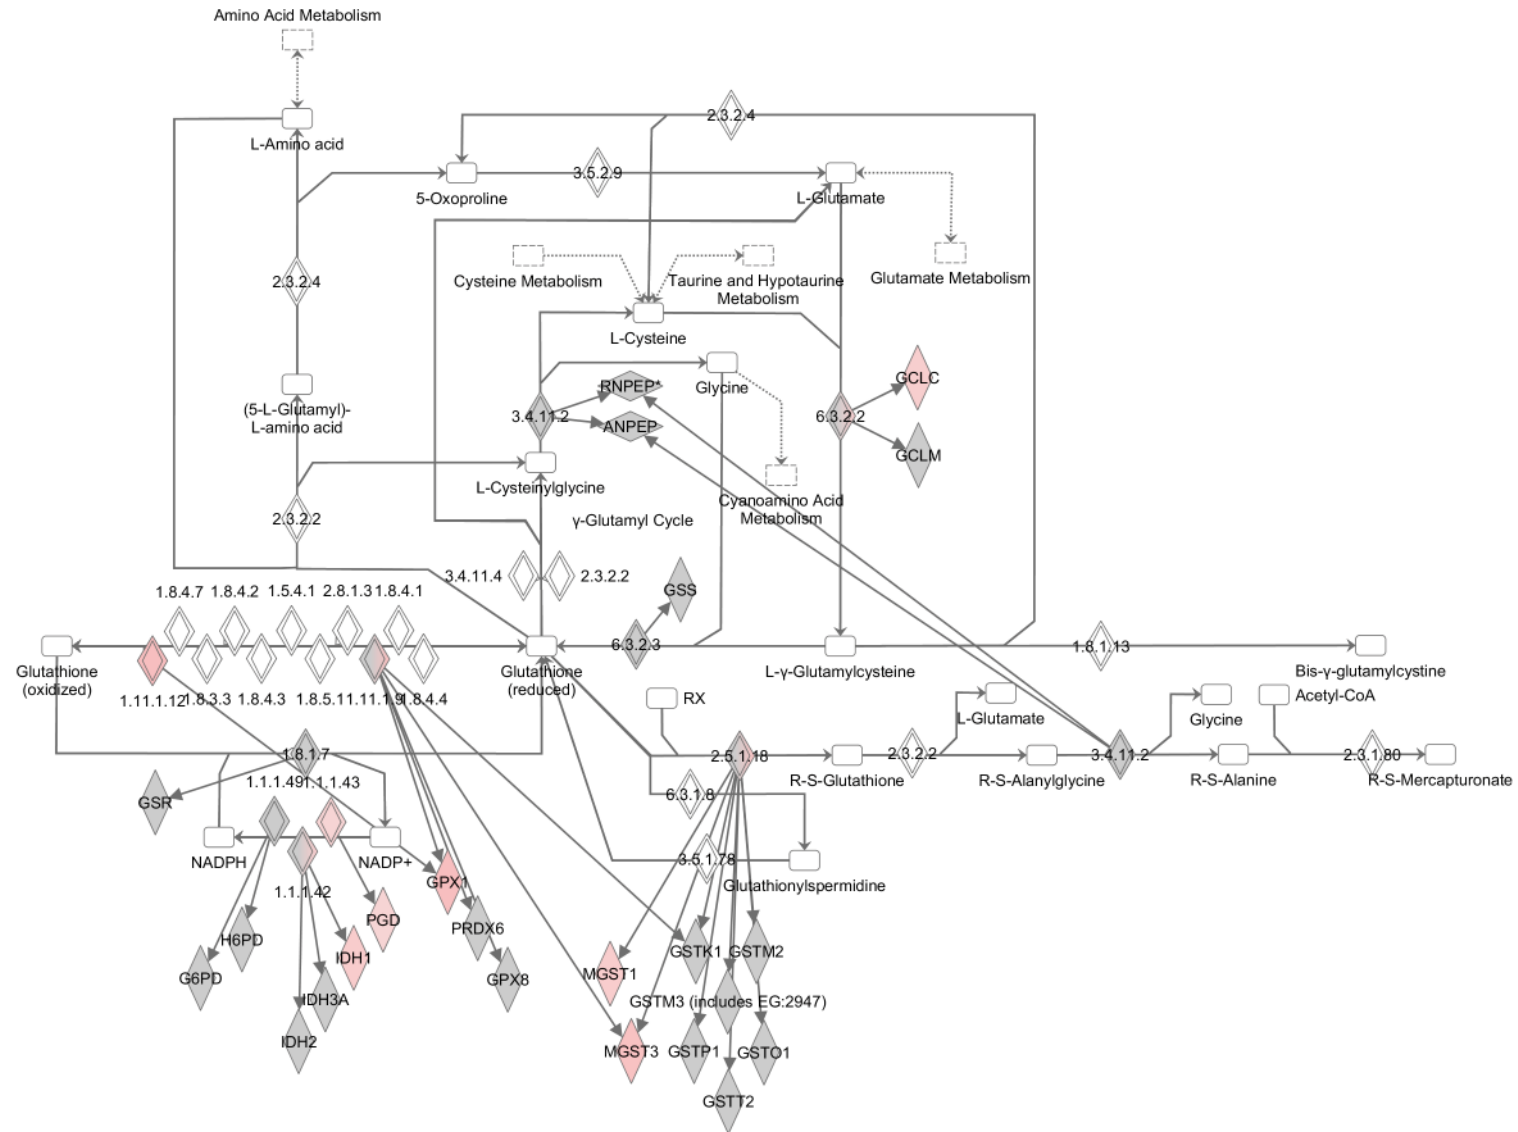

© 2000-2010 Ingenuity Systems, Inc. All rights reserved.

Propanoate Metabolism

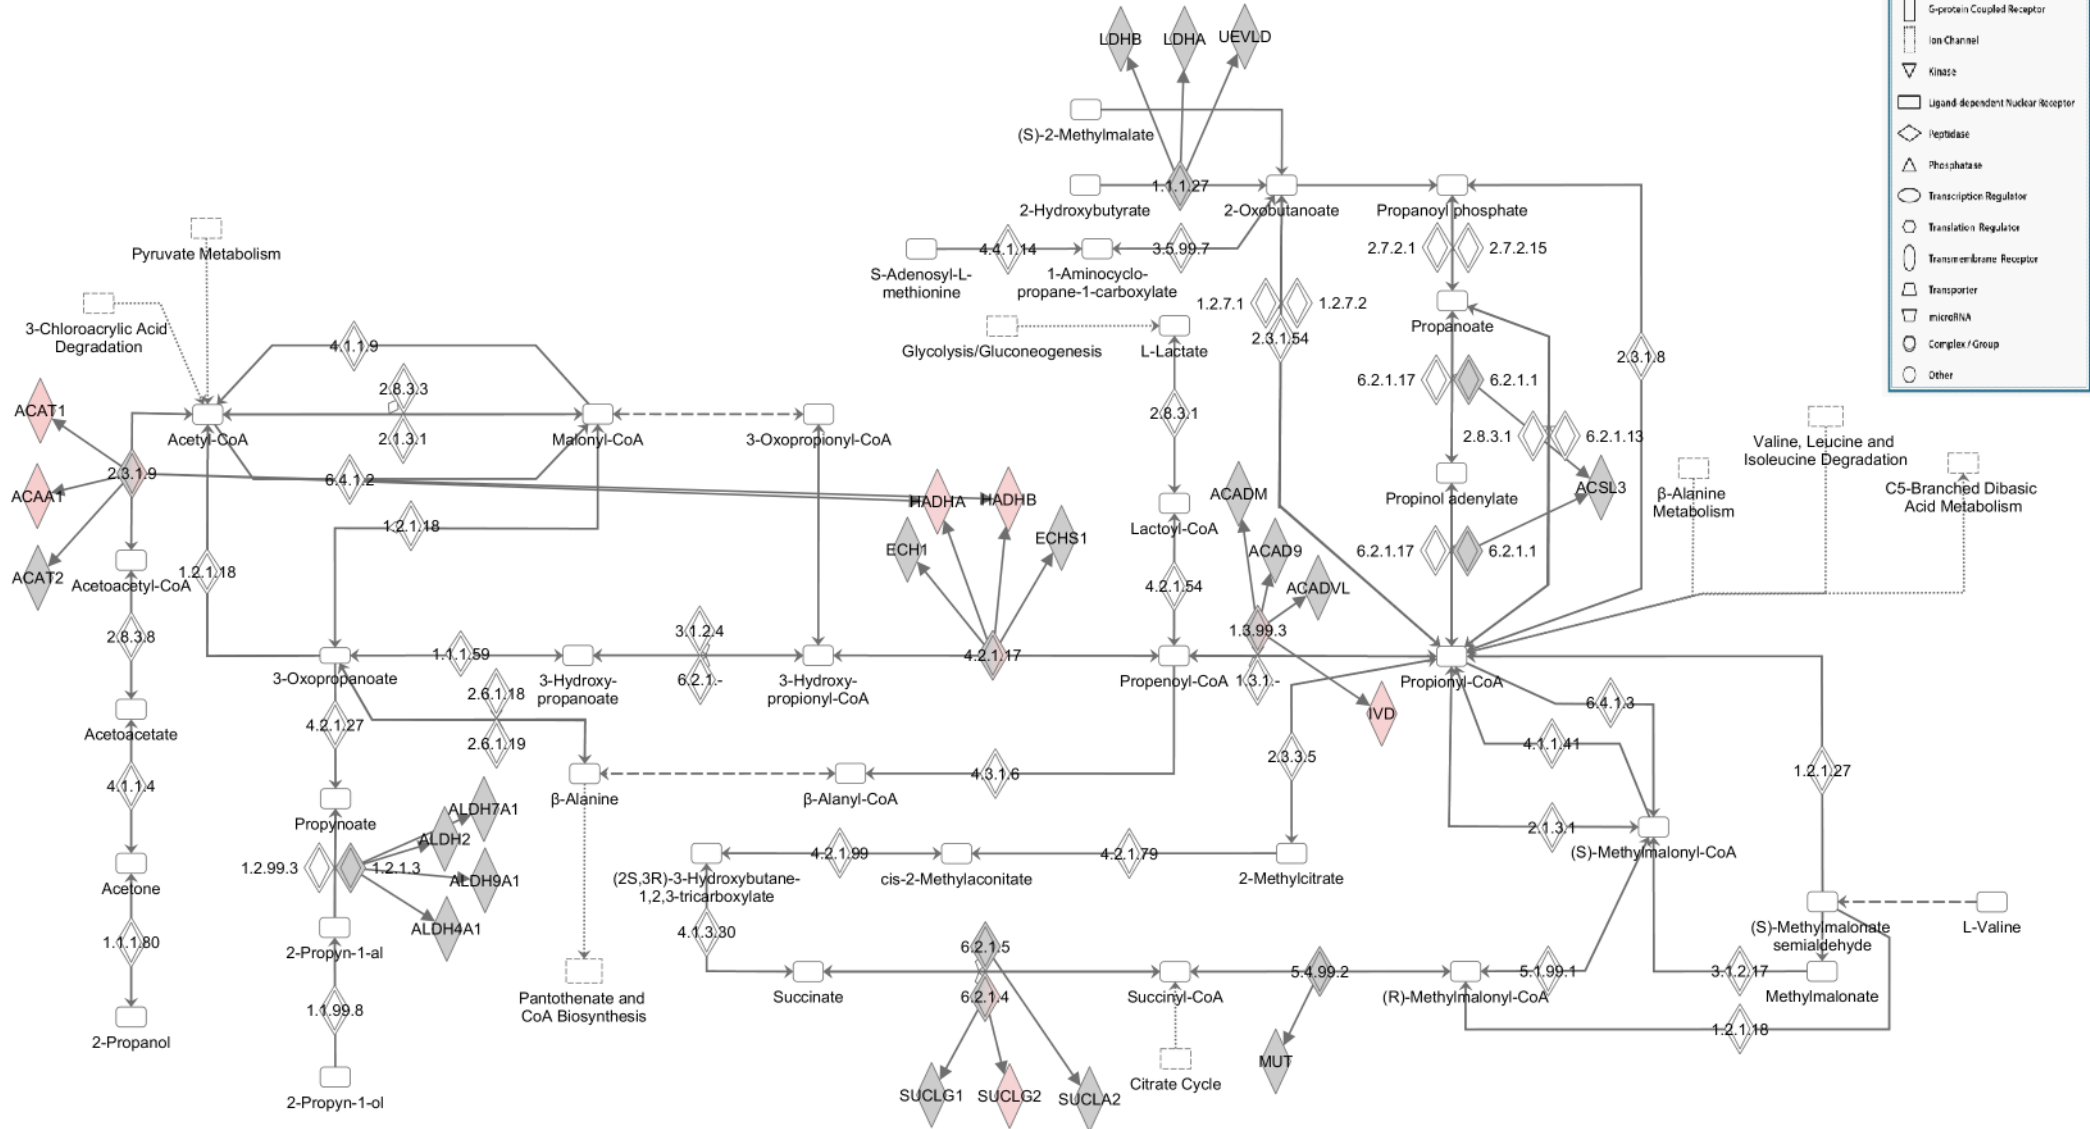

## SUPPLEMENTARY TABLE S3

PATHWAY: NRF2-mediated oxidative stress response

| Symbol         | Synonym(s)                                                                                                                                                                                                                             | Entrez Gene Name                                                                  | HUGO Gene Symbol/RefSeq | Fold Change | p-value   | Location  | Family           | Entrez Gene ID for Human |
|----------------|----------------------------------------------------------------------------------------------------------------------------------------------------------------------------------------------------------------------------------------|-----------------------------------------------------------------------------------|-------------------------|-------------|-----------|-----------|------------------|--------------------------|
| <b>ACTA2</b>   | 0610041G09RIK, a-SMA, AAT6, ACTSA, Actvs, ALPHA ACTIN VSM, ALPHA SMA, ALPHA SMOOTH MUSCLE ACTIN, ALPHA-ACTIN 2, FLJ45296, MGC127800, RGD: 621676, Similar to vascular alpha actin, Sm alpha actin, SMalphaA, SMOOTH MUSCLE ALPHA ACTIN | actin, alpha 2, smooth muscle, aorta                                              | ACTA2                   | -1.14       | 0.23465   | Cytoplasm | other            | 59                       |
| <b>ACTB</b>    | A-X actin, Actin beta, Actx, BETA ACTIN, BETA CA, E430023M04Rik, Melanoma x actin, MGC128179, PS1TP5BP1                                                                                                                                | actin, beta                                                                       | NP_001092               | -1.12       | 0.26517   | Cytoplasm | other            | 60                       |
| <b>ACTG1</b>   | ACT, ACTG, Actin gamma, ACTL, AL023024, beta-actin, Chi-actin, DFNA20, DFNA26, E51, GAMMA ACTIN, MGC28612, MGC117491                                                                                                                   | actin, gamma 1                                                                    | NP_001605               | -1.08       | 0.35337   | Cytoplasm | other            | 71                       |
| <b>AKR</b>     | 2610201A18Rik, Akr1a4, Akra, ALDEHYDE REDUCTASE, ALDR1, ALR, ARM, DD3, MGC1380, MGC12529                                                                                                                                               | aldo-keto reductase family 1, member A1 (aldehyde reductase)                      | NP_006057               | 1.27        | 0.15481   | Cytoplasm | enzyme           | 10327                    |
| <b>AKR1B1</b>  | ADR, Ahr-1, Akr1b3, Akr1b4, Aldolase Reductase, Aldor1, aldose reductase, ALDR1, ALDRED, Alr, ALR2, ALR-P-1, Androgen-induced aldose reductase, AR, MGC1804, RATALDRED                                                                 | aldo-keto reductase family 1, member B1 (aldose reductase)                        | NP_001619               | 1.82        | 0.0010301 | Cytoplasm | enzyme           | 231                      |
| <b>AKR7A2</b>  | 2-Cba Reductase, 0610025K21Rik, AFAR, AFAR1, AFB1-AR1, Aiar, AKR7, Akr7a5                                                                                                                                                              | aldo-keto reductase family 7, member A2 (aflatoxin aldehyde reductase)            | NP_003680               | 1.25        | 0.17548   | Cytoplasm | enzyme           | 8574                     |
| <b>AKT</b>     | AKT, MGC99656, PKB, PKB-ALPHA, PKB/AKT, PRKBA, Protein kinase B, RAC, RAC-ALPHA, Thymoma viral proto-oncogene 1                                                                                                                        | v-akt murine thymoma viral oncogene homolog 1                                     | NP_001014431            | -1.18       | 0.25703   | Cytoplasm | kinase           | 207                      |
| <b>CAT</b>     | 2210418N07, ACATALASIA, Cas-1, CATALASE, Catalase1, Cs-1, MGC128112, MGC138422, MGC138424, RATCAT01, RATCATL                                                                                                                           | catalase                                                                          | NP_001743               | 1.12        | 0.31249   | Cytoplasm | enzyme           | 847                      |
| <b>CBR1</b>    | AW261796, Carbonyl Reductase, CBR, CR, CRN, hCBR1, MGC124927, Ocr, SDR21C1                                                                                                                                                             | carbonyl reductase 1                                                              | NP_001748               | 1.24        | 0.12776   | Cytoplasm | enzyme           | 873                      |
| <b>CCT7</b>    | AA408524, AL022769, CCT-ETA, CCTH, Cctz, Chaperonin 7, Chaperonin subunit 7, MGC110985, NIP7-1, TCP1ETA                                                                                                                                | chaperonin containing TCP1, subunit 7 (eta)                                       | NP_006420               | -1.04       | 0.44457   | Cytoplasm | other            | 10574                    |
| <b>CLPP</b>    | AU019820, D17Wsu160e                                                                                                                                                                                                                   | ClpP caseinolytic peptidase, ATP-dependent, proteolytic subunit homolog (E. coli) | NP_006003               | 1.28        | 0.17218   | Cytoplasm | peptidase        | 8192                     |
| <b>CUL3</b>    | Ai467304, AW146203, MGC189292, mKIAA0617                                                                                                                                                                                               | cullin 3                                                                          | NP_003581               | -1.12       | 0.33617   | Nucleus   | enzyme           | 8452                     |
| <b>DNAJA1</b>  | DJ-2, DjA1, DNAJL2, HDJ, HDJ2, Heat shock 40-kDa protein 4, HSDJ, HSJ2, HSPF4, Nedd7                                                                                                                                                   | DnaJ (Hsp40) homolog, subfamily A, member 1                                       | NP_001530               | -1.11       | 0.31384   | Nucleus   | other            | 3301                     |
| <b>DNAJA2</b>  | 1500017M13RIK, 2010206B19RIK, CPR3, DJ3, DJA2, DNAJ, Dnaj3, DNJ3, DNJA2, HIRIP4, mDj3, MGC93325, PRO3015, RDJ2, Similar to hsp40                                                                                                       | DnaJ (Hsp40) homolog, subfamily A, member 2                                       | NP_005871               | -1.07       | 0.38747   | Nucleus   | enzyme           | 10294                    |
| <b>DNAJB1</b>  | 0610007H11Rik, HDJ1, HSP40, HSPF1, RSPH16B, Sis1                                                                                                                                                                                       | DnaJ (Hsp40) homolog, subfamily B, member 1                                       | NP_006136               | -1.51       | 0.015504  | Nucleus   | other            | 3337                     |
| <b>DNAJB11</b> | 1810031F23Rik, ABBP-2, AL024055, DJ9, EDJ, ERdj3, ERj3, hDj9, HEDJ, LRRGT00084, MGC112680, PRO1080, UNQ537                                                                                                                             | DnaJ (Hsp40) homolog, subfamily B, member 11                                      | NP_057390               | -1.10       | 0.3223    | Cytoplasm | other            | 51726                    |
| <b>DNAJB12</b> | DJ10, DKFZp586B2023, mDj10, MGC94679                                                                                                                                                                                                   | DnaJ (Hsp40) homolog, subfamily B, member 12                                      | NP_001002762            | -1.05       | 0.43731   | Cytoplasm | other            | 54788                    |
| <b>DNAJB4</b>  | 1700029A20Rik, 2010306G19RIK, 5730460G06Rik, DjB4, DNAJW, HLJ1                                                                                                                                                                         | DnaJ (Hsp40) homolog, subfamily B, member 4                                       | NP_008965               | -1.40       | 0.041249  | Nucleus   | other            | 11080                    |
| <b>DNAJB6</b>  | DJ4, DKFZp566D0824, DnaJ, FLJ42837, HHDJ1, HSJ-2, mDj4, MGC1152, MGC102124, MGC117297, MGC139792, MRJ, MSJ-1                                                                                                                           | DnaJ (Hsp40) homolog, subfamily B, member 6                                       | NP_490647               | -1.80       | 0.007898  | Nucleus   | cription regulat | 10049                    |
| <b>DNAJC10</b> | 1200006L06Rik, D2ErtD706e, DKFZp434J1813, ERDJ5, JPDI, MGC104194                                                                                                                                                                       | DnaJ (Hsp40) homolog, subfamily C, member 10                                      | NP_061854               | 1.67        | 0.046982  | Cytoplasm | enzyme           | 54431                    |
| <b>DNAJC13</b> | D030002L11Rik, FLJ25863, Gm1124, KIAA0678, mKIAA0678, RME-8                                                                                                                                                                            | DnaJ (Hsp40) homolog, subfamily C, member 13                                      | NP_056083               | 1.43        | 0.1182    | unknown   | other            | 23317                    |
| <b>DNAJC3</b>  | 58kda Inhibitor Of RNA Activated Protein Kinase, AA408985, AU067833, Dnajc3a, Dnajc3b, FLJ21288, HP58, LOC144871, LOC63880, MGC6474, mp58, P58, P58IPK, p58K, Pkip58, PRKRI                                                            | DnaJ (Hsp40) homolog, subfamily C, member 3                                       | NP_006251               | 1.05        | 0.463     | Cytoplasm | other            | 5611                     |
| <b>DNAJC7</b>  | 2010003F24Rik, 2010004G07Rik, Ccrp, DJ11, DJC7, mDj11, MGC105609, mTpr2, TPR2, TTC2                                                                                                                                                    | DnaJ (Hsp40) homolog, subfamily C, member 7                                       | NP_003306               | -1.20       | 0.1942    | Cytoplasm | other            | 7266                     |
| <b>DNAJC8</b>  | 1110021D09Rik, 2010009J04RIK, AL024084, AU019262, AU044514, HSPC331, SPF31                                                                                                                                                             | DnaJ (Hsp40) homolog, subfamily C, member 8                                       | NP_055095               | -1.52       | 0.035792  | Nucleus   | other            | 22826                    |



|                                 |                                                                                                                                                                                                                                                                                                                            |                                                              |              |       |           |               |                |        |
|---------------------------------|----------------------------------------------------------------------------------------------------------------------------------------------------------------------------------------------------------------------------------------------------------------------------------------------------------------------------|--------------------------------------------------------------|--------------|-------|-----------|---------------|----------------|--------|
| <b>DNAJC9</b>                   | 5330419I01Rik, AU020082, HDJC9, JDD1, KIAA0974, SB73                                                                                                                                                                                                                                                                       | DnaJ (Hsp40) homolog, subfamily C, member 9                  | NP_056005    | -1.48 | 0.054613  | unknown       | other          | 23234  |
| <b>EPHX1</b>                    | AI195553, Ehm, Eph-1, EPHX, EPOX, Epoxide Hydrolase, EPXH1, MEH, MEH8, MICROSOMAL EPOXIDE HYDROLASE                                                                                                                                                                                                                        | epoxide hydrolase 1, microsomal (xenobiotic)                 | NP_000111    | 1.95  | 0.0033081 | Cytoplasm     | peptidase      | 2052   |
| <b>ERP29</b>                    | 1200015M03Rik, 2810446M09Rik, AW209030, C12ORF8, Erp28, Erp31, PDI-DB, PDIA9                                                                                                                                                                                                                                               | endoplasmic reticulum protein 29                             | NP_006808    | 1.27  | 0.10543   | Cytoplasm     | transporter    | 10961  |
| <b>FTH1</b>                     | AL022624, AL033366, APOFERRITIN H CHAIN, FERRITIN H, FERRITIN H CHAIN, Ferritin heavy chain, Ferritin subunit H, FHC, Frih, FTH, FTHL6, H FERRITIN, Hcf, MFH, MGC104426, PIG15, PLIF                                                                                                                                       | ferritin, heavy polypeptide 1                                | NP_002023    | 3.65  | 8.09E-08  | Cytoplasm     | enzyme         | 2495   |
| <b>FTL</b>                      | EG665937, ENSMUSG00000062382, FERRITIN LIGHT CHAIN, FRIL, Fri1, FTL1, Ftl2, L-FERRITIN, MGC71996, MGC102130, MGC102131, MGC118079, MGC118080, NBIA3, RGD1560687, RGD1561055, RGD1566189, YB24D08                                                                                                                           | ferritin, light polypeptide                                  | NP_000137    | 3.04  | 3.36E-06  | Cytoplasm     | other          | 2512   |
| <b>GCLC</b>                     | D9Wsu168e, GAMMA GCS HEAVY CHAIN, Gamma Glutamyl Cysteine Synthetase Light Subunit, Gamma Glutamylcysteine Synthetase, Gamma glutamylcysteine synthetase heavy subunit, GAMMA-GCS, GAMMA-GCSH, GCL, GCS, GCS, Catalytic, GCS-HS, GCSH, Ggcs-hs, GLCL, GLCL-H, GLCLC, Glutamate-Cysteine Ligase, Catalytic Subunit MGC93006 | glutamate-cysteine ligase, catalytic subunit                 | NP_001489    | 1.65  | 0.020921  | Cytoplasm     | enzyme         | 2729   |
| <b>GCLM</b>                     | AI649393, Gamma gclm, GAMMA GCS LIGHT CHAIN, Gamma glutamylcysteine synthase (regulatory), GAMMA GLUTAMYL CYSTEINE SYNTHETASE, GCS1, Gcs Ls, Gcs, Regulatory, GCS-L, Gcslc, GLCLR, glutamat-cystein ligase, regulatory subunit, Glutamate-Cysteine Ligase, Modifier Subunit                                                | glutamate-cysteine ligase, modifier subunit                  | NP_002052    | 1.18  | 0.27621   | Cytoplasm     | enzyme         | 2730   |
| <b>GSR</b>                      | AI325518, D8Ert238e, GLUTATHIONE REDUCTASE, Gr, Gr-1, Gred, GRX, MGC78522                                                                                                                                                                                                                                                  | glutathione reductase                                        | NP_000628    | 1.40  | 0.082832  | Cytoplasm     | enzyme         | 2936   |
| <b>GSTK1</b>                    | 0610025I19Rik, AW260476, DsbA-L, GST, GST13, GST class-kappa, GST13-13, GSTK1-1, GSTkappa, hGSTK1, LOC51064                                                                                                                                                                                                                | glutathione S-transferase kappa 1                            | NP_001137151 | 1.40  | 0.080445  | Cytoplasm     | enzyme         | 373156 |
| <b>GSTM2</b>                    | 0610005A07Rik, AI894236, Cd203c, GST4, Gst Yb3, GSTA4, Gstm2, GSTM, Gstm3, Gstm7, GSTM2-2, GTHMUS, MGC117303                                                                                                                                                                                                               | glutathione S-transferase mu 2 (muscle)                      | NP_000839    | 1.14  | 0.28327   | Cytoplasm     | enzyme         | 2946   |
| <b>GSTM3 (includes EG:2947)</b> | FSC2, GST5, Gst mu 5, GSTB, GSTM3, Gstm5, GSTM3-3, GTM3, MGC3310, MGC3704                                                                                                                                                                                                                                                  | glutathione S-transferase mu 3 (brain)                       | NP_000840    | 1.25  | 0.11884   | Cytoplasm     | enzyme         | 2947   |
| <b>GSTP1</b>                    | DFN7, FAEES3, GLUTATHIONE S TRANSFERASE PHI, GLUTATHIONE S-TRANSFERASE PI, Glutathione s-transferase, chain b, Gm3934, GST3, GST P1-1, GST PI, Gst pi-class subunit 7, Gst Yf, GST-P, Gst7-7, Gst7pi, Gstp2, GSTpiA, Gstpib, Lysyl Oxidase 2, MGC72668, MGC72669, PI                                                       | glutathione S-transferase pi 1                               | NP_000843    | 1.04  | 0.3933    | Cytoplasm     | enzyme         | 2950   |
| <b>GSTT2</b>                    | AI266894, Glutathione-s-transferase theta2, GSTT, MGC182032, mGSTT2, Yrs                                                                                                                                                                                                                                                   | glutathione S-transferase theta 2                            | NP_000845    | 1.24  | 0.23331   | Cytoplasm     | enzyme         | 2953   |
| <b>HIP2</b>                     | AW492011, D5Ert601e, DKFZp564C1216, DKFZp686J24237, E2-25K, HIP2, HYPG, LIG, UBIQUITIN CARRIER, UBIQUITIN CARRIER PROTEIN                                                                                                                                                                                                  | ubiquitin-conjugating enzyme E2K (UBC1 homolog, yeast)       | NP_005330    | -1.17 | 0.21223   | Cytoplasm     | cription regul | 3093   |
| <b>HO-1</b>                     | bK286B10, D8Wsu38e, HEME OXYGENASE, HEME OXYGENASE (DECYCLIZING) 1, HEME OXYGENASE-1, Hemox, Heox, HEOXG, Hmox, HO-1, HSP32                                                                                                                                                                                                | heme oxygenase (decycling) 1                                 | NP_002124    | 6.65  | 1.07E-14  | Cytoplasm     | enzyme         | 3162   |
| <b>HSP90AA1</b>                 | 86kDa, 89kDa, AL024080, AL024147, FLJ31884, Heat shock protein 1, alpha, hsp4, HSP86, HSP89, Hsp90, Hsp86-1, Hsp89-alpha-delta-N, HSP89A, HSP90 ALPHA, HSP90A, HSP90N, HSPC1, HSPCA, HSPCAL1, HSPCAL4, HSPN, LAP2, MGC105293                                                                                               | heat shock protein 90kDa alpha (cytosolic), class A member 1 | NP_001017963 | -1.05 | 0.41083   | Cytoplasm     | other          | 3320   |
| <b>HSP90AB1</b>                 | 90kDa, AL022974, C81438, D6S182, FLJ26984, HSP84, HSP90, Hsp1beta, Hsp84-1, Hsp90 alpha, HSP90-BETA, HSP90B, HSPC2, HSPCB, MGC94263, MGC115780                                                                                                                                                                             | heat shock protein 90kDa alpha (cytosolic), class B member 1 | NP_031381    | -1.08 | 0.33909   | Cytoplasm     | other          | 3326   |
| <b>KRAS</b>                     | AI929937, C-K-RAS, c-Ki-ras, c-Ki-ras p21, Ha-ras, K-RAS B, K-RAS2A, K-RAS2B, K-RAS4A, KI-RAS, KI-RAS4B, KRAS1, KRAS2, MGC7141, NS, NS3, p21, p21B, p21ras, RAS, RAS1, RASH, RASK2                                                                                                                                         | v-Ki-ras2 Kirsten rat sarcoma viral oncogene homolog         | NP_004976    | -1.23 | 0.20399   | Cytoplasm     | enzyme         | 3845   |
| <b>MAP2K1</b>                   | Map Kinase Kinase, MAPKK1, Mek, MEK1, MEKK1, MKK1, Mkp1, PRKMK1                                                                                                                                                                                                                                                            | mitogen-activated protein kinase kinase 1                    | NP_002746    | -1.03 | 0.41162   | Cytoplasm     | kinase         | 5604   |
| <b>MAP2K2</b>                   | AA589381, ERK ACTIVATOR KINASE 2, FLJ26075, MAPKK2, MEK2, Mitogen activated protein kinase kinase 2, MK2, MKK2, p45 MAPK KINASE, PRKMK2                                                                                                                                                                                    | mitogen-activated protein kinase kinase 2                    | NP_109587    | 1.06  | 0.43694   | Cytoplasm     | kinase         | 5605   |
| <b>MAP2K3</b>                   | AW212142, MAP KINASE KINASE 3B, MAPKK3, MEK3, MKK3, MKK3B, mMKK3b, PRKMK3                                                                                                                                                                                                                                                  | mitogen-activated protein kinase kinase 3                    | NP_659731    | -1.20 | 0.23519   | Cytoplasm     | kinase         | 5606   |
| <b>MAPK1</b>                    | 9030612K14Rik, AA407128, AU018647, C78273, ERK, ERK2, ERK42, ERT1, MAPK2, Mapk p42, Mapk1,2, MITOGEN ACTIVATED PROTEIN KINASE 2, Mpk2, p38, p40, p41, P42, p40 HERAK, p41mapk, p42 Erk, P42MAPK, PRKM1, PRKM2                                                                                                              | mitogen-activated protein kinase 1                           | NP_002736    | 1.07  | 0.3449    | Cytoplasm     | kinase         | 5594   |
| <b>MAPK3</b>                    | ERK-1, Esrk1, HS44KDAP, HUMKER1A, Mapk p44, Mapkapk3, MGC20180, Mtap2k, P44, p44-erk, P44ERK1, P44MAPK, PRKM3                                                                                                                                                                                                              | mitogen-activated protein kinase 3                           | NP_002737    | 1.43  | 0.068843  | Cytoplasm     | kinase         | 5595   |
| <b>MGST1</b>                    | 1500002K10Rik, Glutathione s-transferase 1, Gst, GST12, MGC14525, MGC72699, MGST, MGST-I, MICROSOMAL GT                                                                                                                                                                                                                    | microsomal glutathione S-transferase 1                       | NP_064696    | 1.68  | 0.016618  | Cytoplasm     | enzyme         | 4257   |
| <b>MGST3</b>                    | 2010012L10RIK, 2010306B17Rik, 2700004G04RIK, AA516734, GST-III, Loc289197                                                                                                                                                                                                                                                  | microsomal glutathione S-transferase 3                       | NP_004519    | 2.02  | 0.010773  | Cytoplasm     | enzyme         | 4259   |
| <b>MRP1</b>                     | ABC29, ABCC, Abcc1a, Abcc1b, Avcc1a, DKFZp686N04233, DKFZp781G125, GS-X, Mdrap, MRP, MRP1                                                                                                                                                                                                                                  | ATP-binding cassette, sub-family C (CFTR/MRP), member 1      | NP_004987    | 2.13  | 8.66E-04  | lasma Membrar | transporter    | 4363   |

|                |                                                                                                                                                                                                                                                                                                      |                                                                 |              |              |                  |              |                |       |
|----------------|------------------------------------------------------------------------------------------------------------------------------------------------------------------------------------------------------------------------------------------------------------------------------------------------------|-----------------------------------------------------------------|--------------|--------------|------------------|--------------|----------------|-------|
| <b>NQO2</b>    | DHQV, DIA6, MGC94180, NMO2, NMOR2, Ox-2, QR2                                                                                                                                                                                                                                                         | NAD(P)H dehydrogenase, quinone 2                                | NP_000895    | <b>1.05</b>  | <b>0.42868</b>   | Cytoplasm    | enzyme         | 4835  |
| <b>NRAS</b>    | ALPS4, AV095280, c-N-ras p21, DNA Segment, Chr 3, Mjeffers 1, NRAS1, NRASR, NS6, RAS, v-Ras                                                                                                                                                                                                          | neuroblastoma RAS viral (v-ras) oncogene homolog                | NP_002515    | <b>-1.05</b> | <b>0.37592</b>   | asma Membrar | enzyme         | 4893  |
| <b>PIIB</b>    | AA408962, AA553318, AI844835, CPHN2, Cy-Lp, CYCLOPHILIN-B, CYP-20b, CYP-S1, CYPB, MGC2224, MGC14109, OI9, SCYLP                                                                                                                                                                                      | peptidylprolyl isomerase B (cyclophilin B)                      | NP_000933    | <b>1.12</b>  | <b>0.25918</b>   | Cytoplasm    | enzyme         | 5479  |
| <b>PRDX1</b>   | ENHANCER, Enhancer protein, Hbp23, MGC108617, MSP23, NKEFA, OSF-3, PAG, PAGA, PAGB, PEROXIREDOXIN 1, PEROXYREDOXIN 1, PrdxI, PRX1, PRX I, TDPX2, TDX2, TPX2, TPxA                                                                                                                                    | peroxiredoxin 1                                                 | NP_002565    | <b>1.15</b>  | <b>0.21492</b>   | Cytoplasm    | enzyme         | 5052  |
| <b>PRDX2</b>   | AL022839, Band-8, MGC4104, NATURAL KILLER CELL ENHANCING FACTOR B, NKEFB, Peroxide reductase, Peroxiredoxin 2, PRDX-2 ISOFORM A, PRP, PRX2, PRX II, TDPX1, TDX1, Thioredoxin dependent peroxide reductase, Torin, TPx, TPx1, TPx-B, TR, TSA                                                          | peroxiredoxin 2                                                 | NP_005800    | <b>1.10</b>  | <b>0.28559</b>   | Cytoplasm    | enzyme         | 7001  |
| <b>PRDX5</b>   | ACR1, AOEB166, AOPP, B166, MGC117264, MGC142283, MGC142285, Peroxiredoxin 5, PLP, PMP20, PRDX6, PRXV, SBB110, THIOREDOXIN PEROXIDASE 5                                                                                                                                                               | peroxiredoxin 5                                                 | NP_036226    | <b>1.26</b>  | <b>0.10597</b>   | Cytoplasm    | enzyme         | 25824 |
| <b>PRDX6</b>   | 1 CYS PEROXIREDOXIN, 1-Cys, 1-Cys PRX, 9430088D19RIK, AA690119, AIPLA2, ANTI-OXIDANT PROTEIN2, Antioxidant Enzyme B166, AOP2, Aop2-rs3, Brp-12, CP-3, GPx, KIAA0106, KIAA106, LPLA2, Ltw-4, Lvtw-4, MGC46173, mKIAA0106, NSGP, NSGPx, ORF06, p29, PEROXIREDOXIN 6, Prdx5, PRDX6-RS3, PRX, PRX6, PrxV | peroxiredoxin 6                                                 | NP_004896    | <b>-1.15</b> | <b>0.21527</b>   | Cytoplasm    | enzyme         | 9588  |
| <b>PTPLAD1</b> | 4930523M17RIK, AW742319, B-IND1, FLJ90376, HSPC121, MGC25483                                                                                                                                                                                                                                         | protein tyrosine phosphatase-like A domain containing 1         | NP_057479    | <b>1.54</b>  | <b>0.078113</b>  | Cytoplasm    | other          | 51495 |
| <b>RRAS</b>    | AI573426, MGC129444, MGC129445                                                                                                                                                                                                                                                                       | related RAS viral (r-ras) oncogene homolog                      | NP_006261    | <b>-1.16</b> | <b>0.22769</b>   | Cytoplasm    | enzyme         | 6237  |
| <b>RRAS2</b>   | 2610016H24Rik, C86394, MGC109327, TC21                                                                                                                                                                                                                                                               | related RAS viral (r-ras) oncogene homolog 2                    | NP_036382    | <b>-1.05</b> | <b>0.44202</b>   | asma Membrar | enzyme         | 22800 |
| <b>SOD1</b>    | ALS, ALS1, B430204E11Rik, CU/ZN-SOD, CUZNSOD, czSOD, EG667310, homodimer, Ipo-1, IPOA, MGC107553, SOD, SOD1L1, SODC                                                                                                                                                                                  | superoxide dismutase 1, soluble                                 | NP_000445    | <b>1.22</b>  | <b>0.13941</b>   | Cytoplasm    | enzyme         | 6647  |
| <b>SOD2</b>    | IPOB, MANGANESE DEPENDENT SOD, Manganese Superoxide Dismutase 2, MGC5618, MGC6144, MGC128371, MITOCHONDRIAL SOD, Mn superoxide dismutase, MNSOD, MVCD6                                                                                                                                               | superoxide dismutase 2, mitochondrial                           | NP_000627    | <b>1.09</b>  | <b>0.34609</b>   | Cytoplasm    | enzyme         | 6648  |
| <b>SQSTM1</b>  | A170, OSF-6, Osi, OSIL, Oxidative Stress, p60, P62, p62B, PDB3, Pkc zeta interacting, STAP, Ubiquitin-binding protein a. ZIP, ZIP3                                                                                                                                                                   | sequestosome 1                                                  | NP_003891    | <b>2.93</b>  | <b>6.62E-06</b>  | Cytoplasm    | cription regul | 8878  |
| <b>STIP1</b>   | HOP, IEF-SSP-3521, mSTI1, P60, SIP1, STI1, STI1L, Stress-induced phosphoprotein 1                                                                                                                                                                                                                    | stress-induced-phosphoprotein 1                                 | NP_006810    | <b>-1.03</b> | <b>0.46429</b>   | Cytoplasm    | other          | 10963 |
| <b>TRXR1</b>   | GRIM-12, KM 102 DERIVED REDUCTASE LIKE FACTOR, MGC9145, MGC93353, Tgr, Thioredoxin reductase, TR, TR1, TRXR1, TXNR                                                                                                                                                                                   | thioredoxin reductase 1                                         | NP_001087240 | <b>1.76</b>  | <b>0.0017543</b> | Cytoplasm    | enzyme         | 7296  |
| <b>TXN</b>     | ADF, AW550880, DKFZp686B1993, EOSINOPHIL CYTOTOXICITY FACTOR, MGC61975, MGC151960, THIOREDOXIN, TRX, TRX1, Txn1                                                                                                                                                                                      | thioredoxin                                                     | NP_003320    | <b>2.01</b>  | <b>0.0022687</b> | Cytoplasm    | enzyme         | 7295  |
| <b>USP14</b>   | 2610005K12Rik, 2610037B11RIK, AW107924, ax, C78769, MGC95160, TGT, Ubiquitin specific protease 14                                                                                                                                                                                                    | ubiquitin specific peptidase 14 (tRNA-guanine transglycosylase) | NP_005142    | <b>-1.03</b> | <b>0.45801</b>   | Cytoplasm    | peptidase      | 9097  |
| <b>VCP</b>     | 3110001E05, CDC48, IBMPFD, MGC8560, MGC131997, MGC148092, P97, P97 kinase, p97/VCP, Ter atpase, TERA, TRANSITIONAL ENDOPLASMIC RETICULUM ATPASE, XSG7                                                                                                                                                | valosin-containing protein                                      | NP_009057    | <b>1.07</b>  | <b>0.34417</b>   | Cytoplasm    | enzyme         | 7415  |

| PATHWAY: Synthesis and degradation of ketone bodies |                                                                                                                                                                                                                                               | Entrez Gene Name                                                                                                                      | HUGO Gene Symbol/RefSeq | Fold Change | p-value          | Location  | Family | Entrez Gene ID for Human |
|-----------------------------------------------------|-----------------------------------------------------------------------------------------------------------------------------------------------------------------------------------------------------------------------------------------------|---------------------------------------------------------------------------------------------------------------------------------------|-------------------------|-------------|------------------|-----------|--------|--------------------------|
| <b>ACAA1</b>                                        | 3-oxoacyl-coa Thiolase, ACAA, Acaa1a, Acaa1b, D9ErtD25e, MGC108766, MGC7090, Peroxisomal 3-Ketoacyl CoA Thiolase, peroxisomal 3-oxoacyl-Coenzyme A thiolase, Peroxisomal thiolase, Pktaa, Pt, PTHIO, pThiol, PTL, RGD1562373, THIO, THIOLEASE | acetyl-Coenzyme A acyltransferase 1                                                                                                   | NP_001598               | <b>1.62</b> | <b>0.023554</b>  | Cytoplasm | enzyme | 30                       |
| <b>ACAT1</b>                                        | 3-Ketothiolase, 6330585C21Rik, AA CoA Thiolase, ACAT, Acetyl-CoA acetyltransferase 1, Acyl-coa acetyltransferase, Acyl-coa acetyltransferase 1, MAT, RATAACAL, T2, THIL                                                                       | acetyl-Coenzyme A acetyltransferase 1                                                                                                 | NP_000010               | <b>1.65</b> | <b>0.0050079</b> | Cytoplasm | enzyme | 38                       |
| <b>ACAT2</b>                                        | Ab2-076, Acat3, Acetoacetyl Coa Thiolase, ACETOACOENZYME A ACETYLTRANSFERASE 2, ACTL, AW742799, MGC95138, Similar to tcp1x, T2, Tcp-1x, Tcp-x1, Tcp1-rs1                                                                                      | acetyl-Coenzyme A acetyltransferase 2                                                                                                 | NP_005882               | <b>1.23</b> | <b>0.19111</b>   | Cytoplasm | enzyme | 39                       |
| <b>BDH2</b>                                         | 1810026B04Rik, DHRS6, EFA6R, FLJ13261, PRO20933, SDR15C1, UCPA-OR, UNQ6308                                                                                                                                                                    | 3-hydroxybutyrate dehydrogenase, type 2                                                                                               | NP_064524               | <b>1.28</b> | <b>0.17058</b>   | Cytoplasm | enzyme | 56898                    |
| <b>HADHA</b>                                        | C77020, ECHA, Enoyl-CoA Hydratase, GBP, HADH, LCHAD, MGC1728, MGC105338, Mitochondrial long chain enoyl CoA hydratase, Mitochondrial trifunctional protein alpha, MTPA, RGD1560655, TP-ALPHA                                                  | hydroxyacyl-Coenzyme A dehydrogenase/3-ketoacyl-Coenzyme A thiolase/enoyl-Coenzyme A hydratase (trifunctional protein), alpha subunit | NP_000173               | <b>1.46</b> | <b>0.025326</b>  | Cytoplasm | enzyme | 3030                     |

|               |                                                                                                                                                                                                                                |                                                                                                                                      |              |              |                 |           |        |      |
|---------------|--------------------------------------------------------------------------------------------------------------------------------------------------------------------------------------------------------------------------------|--------------------------------------------------------------------------------------------------------------------------------------|--------------|--------------|-----------------|-----------|--------|------|
| <b>HADHB</b>  | 3-ketoacyl-CoA thiolase, 4930479F15Rik, A hydratase (trifunctional protein), beta subunit, ECHB, Gm13910, LOC100048492, MGC87480, Mitochondrial long chain 3-ketoacyl-CoA thiolase, MSTP029, Mtpb, OTTMUSG00000015054, TP-BETA | hydroxyacyl-Coenzyme A dehydrogenase/3-ketoacyl-Coenzyme A thiolase/enoyl-Coenzyme A hydratase (trifunctional protein), beta subunit | NP_000174    | <b>1.50</b>  | <b>0.017067</b> | Cytoplasm | enzyme | 3032 |
| <b>HMGCL</b>  | 3-Hydroxy-3-methylglutaryl coa lyase, AW476067, HL, HMG CoA lyase                                                                                                                                                              | 3-hydroxymethyl-3-methylglutaryl-Coenzyme A lyase                                                                                    | HMGCL        | <b>-7.76</b> | <b>1.04E-17</b> | Cytoplasm | enzyme | 3155 |
| <b>HMGCS1</b> | B130032C06Rik, HMGCS, Hydroxymethylglutaryl-CoA synthase, cytoplasmic, LOC100040592, MGC36662, MGC90332, MGC98430                                                                                                              | 3-hydroxy-3-methylglutaryl-Coenzyme A synthase 1 (soluble)                                                                           | NP_001091742 | <b>2.20</b>  | <b>5.31E-04</b> | Cytoplasm | enzyme | 3157 |
| <b>OXCT1</b>  | 2610008O03Rik, 3-Oxoacid coa transferase, LOC678860, LOC690109, LOC690163, MGC187935, OXCT, Oxct1 (predicted), Oxct2a, SCOT, Scot-s, Succinyl coa:3-ketoacid coa transferase, Succinyl COA:3-OXOACID COA TRANSFERASE           | 3-oxoacid CoA transferase 1                                                                                                          | NP_000427    | <b>-1.00</b> | <b>0.4867</b>   | Cytoplasm | enzyme | 5019 |

| PATHWAY: Butanoate Metabolism |                                                                                                                                                                                                                                                           |                                                                                                                                       |                         |              |                  |           |        |                          |
|-------------------------------|-----------------------------------------------------------------------------------------------------------------------------------------------------------------------------------------------------------------------------------------------------------|---------------------------------------------------------------------------------------------------------------------------------------|-------------------------|--------------|------------------|-----------|--------|--------------------------|
| Symbol                        | Synonym(s)                                                                                                                                                                                                                                                | Entrez Gene Name                                                                                                                      | HUGO Gene Symbol/RefSeq | Fold Change  | p-value          | Location  | Family | Entrez Gene ID for Human |
| <b>ACAA1</b>                  | 3-oxoacyl-coa Thiolase, ACAA, Acaa1a, Acaa1b, D9ErtD25e, MGC7090, MGC108766, Peroxisomal 3-Ketoacyl CoA Thiolase, peroxisomal 3-oxoacyl-Coenzyme A thiolase, Peroxisomal thiolase, Pktaa, Pt, PTHIO, pThiol, PTL, RGD1562373, THIO, THIOASE               | acetyl-Coenzyme A acyltransferase 1                                                                                                   | NP_001598               | <b>1.62</b>  | <b>0.023554</b>  | Cytoplasm | enzyme | 30                       |
| <b>ACAT1</b>                  | 3-Ketothiolase, 6330585C21Rik, AA CoA Thiolase, ACAT, Acetyl-CoA acetyltransferase 1, Acyl-coa acetyltransferase, Acyl-coa acetyltransferase 1, MAT, RATACAL, T2, THIL                                                                                    | acetyl-Coenzyme A acetyltransferase 1                                                                                                 | NP_000010               | <b>1.65</b>  | <b>0.0050079</b> | Cytoplasm | enzyme | 38                       |
| <b>ACAT2</b>                  | Ab2-076, Acat3, Acetoacetyl Coa Thiolase, ACETOCOENZYME A ACETYLTRANSFERASE 2, ACTL, AW742799, MGC95138, Similar to tcp1x, T2, Tcp-1x, Tcp-x1, Tcp1-rs1                                                                                                   | acetyl-Coenzyme A acetyltransferase 2                                                                                                 | NP_005882               | <b>1.23</b>  | <b>0.19111</b>   | Cytoplasm | enzyme | 39                       |
| <b>ALDH2</b>                  | Ahd-5, Aldehyde dehydr 2,A2, ALDH-E2, ALDHI, ALDM, Hepatic aldehyde dehydrogenase 2, MGC1806                                                                                                                                                              | aldehyde dehydrogenase 2 family (mitochondrial)                                                                                       | NP_000681               | <b>1.22</b>  | <b>0.20106</b>   | Cytoplasm | enzyme | 217                      |
| <b>ALDH4A1</b>                | A930035F14Rik, Ahd-1, ALDH4, Aldh5a1, DKFZp779M035, E330022C09, P5CD, P5CDh, P5cdhl, P5cdhs, Ssdh1                                                                                                                                                        | aldehyde dehydrogenase 4 family, member A1                                                                                            | NP_003739               | <b>1.53</b>  | <b>0.080166</b>  | Cytoplasm | enzyme | 8659                     |
| <b>ALDH7A1</b>                | Aldehyde dehydrogenase family 7 member a1, antiquitin, ATQ1, D18Wsu181e, EPD, FLJ11738, FLJ92814, PDE                                                                                                                                                     | aldehyde dehydrogenase 7 family, member A1                                                                                            | NP_001173               | <b>1.21</b>  | <b>0.21109</b>   | Cytoplasm | enzyme | 501                      |
| <b>ALDH9A1</b>                | 4-Trimethylaminobutyraldehyde Dehydrogenase 9a, AA139417, Abaldh, ALDH4, ALDH7, ALDH9, E3, ESTM40, TMABA-DH                                                                                                                                               | aldehyde dehydrogenase 9 family, member A1                                                                                            | NP_000687               | <b>1.18</b>  | <b>0.23452</b>   | Cytoplasm | enzyme | 223                      |
| <b>BDH2</b>                   | 1810026B04Rik, DHRS6, EFA6R, FLJ13261, PRO20933, SDR15C1, UCPA-OR, UNQ6308                                                                                                                                                                                | 3-hydroxybutyrate dehydrogenase, type 2                                                                                               | NP_064524               | <b>1.28</b>  | <b>0.17058</b>   | Cytoplasm | enzyme | 56898                    |
| <b>DCXR</b>                   | 0610038K04Rik, 1810027P18Rik, DCR, glb, HCR2, HCR11, KIDCR, P34H, SDR20C1                                                                                                                                                                                 | dicarbonyl/L-xylulose reductase                                                                                                       | NP_057370               | <b>1.14</b>  | <b>0.32316</b>   | Cytoplasm | enzyme | 51181                    |
| <b>ECH1</b>                   | AA617331, Delta(3,5)-Delta(2,4)-dienoyl-CoA isomerase, mitochondrial, Delta(3,5)-Delta(2,4)-dienoyl-CoA isomerase, peroxisomal, HIP11, HPXEL, MGC107274, Mitochondrial dienoyl-coa isomerase, Perox enolhydratase, Peroxisomal enoyl hydratase-like, Pxel | enoyl Coenzyme A hydratase 1, peroxisomal                                                                                             | NP_001389               | <b>-1.04</b> | <b>0.4027</b>    | Cytoplasm | enzyme | 1891                     |
| <b>ECHS1</b>                  | C80529, Enoyl-CoA hydratase, short-chain, 1, mitochondrial, SCEH                                                                                                                                                                                          | enoyl Coenzyme A hydratase, short chain, 1, mitochondrial                                                                             | NP_004083               | <b>1.34</b>  | <b>0.11116</b>   | Cytoplasm | enzyme | 1892                     |
| <b>HADH</b>                   | 3 Hydroxyacyl Coenzyme A Dehydrogenase, 3-hydroxyacyl-coa dehydrogenase, AA409008, AU019341, AW742602, Beta-3 Hydroxyacyl Coenzyme A Dehydrogenase, HAD, HADH1, HADHSC, HHF4, M/SCHAD, MGC8392, SCHAD                                                     | hydroxyacyl-Coenzyme A dehydrogenase                                                                                                  | NP_005318               | <b>1.09</b>  | <b>0.37321</b>   | Cytoplasm | enzyme | 3033                     |
| <b>HADHA</b>                  | C77020, ECHA, Enoyl-CoA Hydratase, GBP, HADH, LCHAD, MGC1728, MGC105338, Mitochondrial long chain enoyl CoA hydratase, Mitochondrial trifunctional protein alpha, MTPA, RGD1560655, TP-ALPHA                                                              | hydroxyacyl-Coenzyme A dehydrogenase/3-ketoacyl-Coenzyme A thiolase/enoyl-Coenzyme A hydratase (trifunctional protein), alpha subunit | NP_000173               | <b>1.46</b>  | <b>0.025326</b>  | Cytoplasm | enzyme | 3030                     |
| <b>HADHB</b>                  | 3-ketoacyl-CoA thiolase, 4930479F15Rik, A hydratase (trifunctional protein), beta subunit, ECHB, Gm13910, LOC100048492, MGC87480, Mitochondrial long chain 3-ketoacyl-CoA thiolase, MSTP029, Mtpb, OTTMUSG00000015054, TP-BETA                            | hydroxyacyl-Coenzyme A dehydrogenase/3-ketoacyl-Coenzyme A thiolase/enoyl-Coenzyme A hydratase (trifunctional protein), beta subunit  | NP_000174               | <b>1.50</b>  | <b>0.017067</b>  | Cytoplasm | enzyme | 3032                     |

|                                 |                                                                                                                                                                                                                      |                                                               |              |       |          |           |        |       |
|---------------------------------|----------------------------------------------------------------------------------------------------------------------------------------------------------------------------------------------------------------------|---------------------------------------------------------------|--------------|-------|----------|-----------|--------|-------|
| <b>HMGCL</b>                    | 3-Hydroxy-3-methylglutaryl coa lyase, AW476067, HL, HMG CoA lyase                                                                                                                                                    | 3-hydroxymethyl-3-methylglutaryl-Coenzyme A lyase             | HMGCL        | -7.76 | 1.04E-17 | Cytoplasm | enzyme | 3155  |
| <b>HMGCS1</b>                   | B130032C06Rik, HMGCS, Hydroxymethylglutaryl-CoA synthase, cytoplasmic, LOC100040592, MGC36662, MGC90332, MGC98430                                                                                                    | 3-hydroxy-3-methylglutaryl-Coenzyme A synthase 1 (soluble)    | NP_001091742 | 2.20  | 5.31E-04 | Cytoplasm | enzyme | 3157  |
| <b>HSD17B10</b>                 | 17b-HSD10, ABAD, Ads9, CAMR, DUPXp11.22, ERAB, HADH2, HCD2, Hydroxysteroid dehydrogenase 10, MHBD, MRPP2, MRX17, MRX31, MRXS10, SCHAD, SDR5C1, XH98G2                                                                | hydroxysteroid (17-beta) dehydrogenase 10                     | NP_004484    | 1.26  | 0.16529  | Cytoplasm | enzyme | 3028  |
| <b>HSD17B4</b>                  | 17 beta Hydroxy Steroid Dehydrogenase Isoform 4, 17-BETA HSD4, 17[b]-HSD, AW208803, D-bifunctional, D-pbe, Dbf, DBP, HD, MFE-2, Mfp-2, NS1-l, perMFE-2, Ph, Pmeii, SDR8C1                                            | hydroxysteroid (17-beta) dehydrogenase 4                      | NP_000405    | 1.42  | 0.075066 | Cytoplasm | enzyme | 3295  |
| <b>OXCT1</b>                    | 3-Oxoacid coa transferase, 2610008003Rik, LOC678860, LOC690109, LOC690163, MGC187935, OXCT, Oxct1 (predicted), Oxct2a, SCOT, Scot-s, Succinyl coa:3-ketoacid coa transferase, Succinyl COA:3-OXOACID COA TRANSFERASE | 3-oxoacid CoA transferase 1                                   | NP_000427    | -1.00 | 0.4867   | Cytoplasm | enzyme | 5019  |
| <b>PDHA1 (includes EG:5160)</b> | E1 ALPHA PDH, MGC94854, MGC114215, Pdh e1alpha, PDHA, Pdha1, PDHCE1A, PHE1A, Pyruvate dehydrogenase e1 alpha1                                                                                                        | pyruvate dehydrogenase (lipoamide) alpha 1                    | NP_000275    | 1.31  | 0.12954  | Cytoplasm | enzyme | 5160  |
| <b>PDHB</b>                     | 2610103L06Rik, ALO24199, C81408, DKFZp564K0164, MGC94149, Odpb, PDHE1-B, PHE1B, Pyruvate dehydrogenase, Pyruvate dehydrogenase (lipoamide)                                                                           | pyruvate dehydrogenase (lipoamide) beta                       | NP_000916    | 1.19  | 0.23003  | Cytoplasm | enzyme | 5162  |
| <b>PPME1</b>                    | 1110069N17Rik, 2700017M01Rik, FLJ22226, PME-1, RGD1309683                                                                                                                                                            | protein phosphatase methylesterase 1                          | NP_057231    | -1.47 | 0.047468 | unknown   | enzyme | 51400 |
| <b>SDHA</b>                     | 1500032O14RIK, 2310034D06Rik, 4921513A11, C81073, FP, SDH1, SDH2, SDHF, Succinate dehydrogenase complex, subunit A flavoprotein (Fp), Succinate-ubiquinone oxidoreductase 70-kda subunit                             | succinate dehydrogenase complex, subunit A, flavoprotein (Fp) | NP_004159    | 1.06  | 0.40684  | Cytoplasm | enzyme | 6389  |
| <b>SDHB</b>                     | 0710008N11Rik, FLJ92337, IP, PCHC, PGL4, SDH, SDH1, SDH2, SDHIP, Succinate Dehydrogenase Cytochrome B Subunit, Succinate Dehydrogenase Ip Cytochrome B Subunit, Succinate dehydrogenase putative iron sulfur subunit | succinate dehydrogenase complex, subunit B, iron sulfur (Ip)  | NP_002991    | 1.09  | 0.39702  | Cytoplasm | enzyme | 6390  |
| <b>SUCLG2</b>                   | AF171077, AW556404, D6Wsu120e, G-BETA, G-SCS, Loc362404, MGC91183, SCS-betaG                                                                                                                                         | succinate-CoA ligase, GDP-forming, beta subunit               | NP_003839    | 1.47  | 0.057346 | Cytoplasm | enzyme | 8801  |

| PATHWAY: Bile acid synthesis  |                                                                                                                                                                                                                                             | Entrez Gene Name                                                                                                                                                                     | HUGO Gene Symbol/RefSeq | Fold Change | p-value  | Location  | Family | Entrez Gene ID for Human |
|-------------------------------|---------------------------------------------------------------------------------------------------------------------------------------------------------------------------------------------------------------------------------------------|--------------------------------------------------------------------------------------------------------------------------------------------------------------------------------------|-------------------------|-------------|----------|-----------|--------|--------------------------|
| <b>ACAA1</b>                  | 3-oxoacyl-coa Thiolase, ACAA, Acaa1a, Acaa1b, D9ErtD25e, MGC7090, MGC108766, Peroxisomal 3-Ketoacyl CoA Thiolase, peroxisomal 3-oxoacyl-Coenzyme A thiolase, Peroxisomal thiolase, Pktaa, Pt, PTHIO, pThiol, PTL, RGD1562373, THIO, THIOASE | acetyl-Coenzyme A acyltransferase 1                                                                                                                                                  | NP_001598               | 1.62        | 0.023554 | Cytoplasm | enzyme | 30                       |
| <b>ACAA2</b>                  | 3-ketoacyl coa thiolase, 3-OXOACYL-COA THIOLASE, 0610011L04Rik, AI255831, AI265397, D18ErtD240e, DSAEC, FLJ35992, FLJ95265, T1                                                                                                              | acetyl-Coenzyme A acyltransferase 2                                                                                                                                                  | NP_006102               | 1.34        | 0.10984  | Cytoplasm | enzyme | 10449                    |
| <b>ADH5 (includes EG:128)</b> | Adh5, ADH-3, ADHX, CLASS III ADH, FDH, Gs fdh, GSNOR                                                                                                                                                                                        | alcohol dehydrogenase 5 (class III), chi polypeptide aldo-keto reductase family 1, member C1 (dihydrodiol dehydrogenase 1; 20-alpha (3-alpha)-hydroxysteroid dehydrogenase) aldehyde | NP_000662               | 1.59        | 0.029378 | Cytoplasm | enzyme | 128                      |
| <b>AKR1C1</b>                 | 2-ALPHA-HSD, 20-ALPHA-HSD, 9430025F20Rik, AI315367, Akr1c2, Akr1c21, C9, DD1, DDH, DDH1, DIHYDRODIOL DEHYDROGENASE, H-37, HAKRC, Hepatic Bile Acid Binding, MBAB, MGC8954, MGC102401                                                        | 20-alpha (3-alpha)-hydroxysteroid dehydrogenase (aldehyde)                                                                                                                           | NP_001344               | 3.35        | 4.93E-07 | Cytoplasm | enzyme | 1645                     |
| <b>ALDH2</b>                  | Ahd-5, Aldehyde dehydr 2,A2, ALDH-E2, ALDHI, ALDM, Hepatic aldehyde dehydrogenase 2, MGC1806                                                                                                                                                | aldehyde dehydrogenase 2 family (mitochondrial)                                                                                                                                      | NP_000681               | 1.22        | 0.20106  | Cytoplasm | enzyme | 217                      |
| <b>ALDH4A1</b>                | A930035F14Rik, Ahd-1, ALDH4, Aldh5a1, DKFZp779M035, E330022C09, P5CD, P5CDh, P5cdhl, P5cdhs, Ssdh1                                                                                                                                          | aldehyde dehydrogenase 4 family, member A1                                                                                                                                           | NP_003739               | 1.53        | 0.080166 | Cytoplasm | enzyme | 8659                     |
| <b>ALDH7A1</b>                | Aldehyde dehydrogenase family 7 member a1, antiquitin, ATQ1, D18Wsu181e, EPD, FLJ11738, FLJ92814, PDE                                                                                                                                       | aldehyde dehydrogenase 7 family, member A1                                                                                                                                           | NP_001173               | 1.21        | 0.21109  | Cytoplasm | enzyme | 501                      |
| <b>ALDH9A1</b>                | 4-Trimethylaminobutyraldehyde Dehydrogenase 9a, AA139417, Abaldh, ALDH4, ALDH7, ALDH9, E3, ESTM40, TMABA-DH                                                                                                                                 | aldehyde dehydrogenase 9 family, member A1                                                                                                                                           | NP_000687               | 1.18        | 0.23452  | Cytoplasm | enzyme | 223                      |
| <b>HADHA</b>                  | C77020, ECHA, Enoyl-CoA Hydratase, GBP, HADH, LCHAD, MGC1728, MGC105338, Mitochondrial long chain enoyl CoA hydratase, Mitochondrial trifunctional protein alpha, MTPA, RGD1560655, TP-ALPHA                                                | hydroxyacyl-Coenzyme A dehydrogenase/3-ketoacyl-Coenzyme A thiolase/enoyl-Coenzyme A hydratase (trifunctional protein), alpha subunit                                                | NP_000173               | 1.46        | 0.025326 | Cytoplasm | enzyme | 3030                     |

|              |                                                                                                                                                                                                                                |                                                                                                                                      |           |      |          |           |        |       |
|--------------|--------------------------------------------------------------------------------------------------------------------------------------------------------------------------------------------------------------------------------|--------------------------------------------------------------------------------------------------------------------------------------|-----------|------|----------|-----------|--------|-------|
| <b>HADHB</b> | 3-ketoacyl-CoA thiolase, 4930479F15Rik, A hydratase (trifunctional protein), beta subunit, ECHB, Gm13910, LOC100048492, MGC87480, Mitochondrial long chain 3-ketoacyl-CoA thiolase, MSTP029, Mtpb, OTTMUSG00000015054, TP-BETA | hydroxyacyl-Coenzyme A dehydrogenase/3-ketoacyl-Coenzyme A thiolase/enoyl-Coenzyme A hydratase (trifunctional protein), beta subunit | NP_000174 | 1.50 | 0.017067 | Cytoplasm | enzyme | 3032  |
| <b>PTGR1</b> | 2510002C21Rik, Ao, Dig1, FLJ99229, LTB4DH, MGC34943, PGR1, ZADH3                                                                                                                                                               | prostaglandin reductase 1                                                                                                            | NP_036344 | 1.50 | 0.01743  | Cytoplasm | enzyme | 22949 |

| PATHWAY: Valine, leucine, isoleucine degradation |                                                                                                                                                                                                                                                           |                                                                                                                                       |                         |             |           |           |        |                          |
|--------------------------------------------------|-----------------------------------------------------------------------------------------------------------------------------------------------------------------------------------------------------------------------------------------------------------|---------------------------------------------------------------------------------------------------------------------------------------|-------------------------|-------------|-----------|-----------|--------|--------------------------|
| Symbol                                           | Synonym(s)                                                                                                                                                                                                                                                | Entrez Gene Name                                                                                                                      | HUGO Gene Symbol/RefSeq | Fold Change | p-value   | Location  | Family | Entrez Gene ID for Human |
| <b>ACAA1</b>                                     | 3-oxoacyl-coa Thiolase, ACAA, Acaa1a, Acaa1b, D9Ert25e, MGC7090, MGC108766, Peroxisomal 3-Ketoacyl CoA Thiolase, peroxisomal 3-oxoacyl-Coenzyme A thiolase, Peroxisomal thiolase, Pktaa, Pt, PTHIO, pThiol, PTL, RGD1562373, THIO, THIOLASE               | acetyl-Coenzyme A acyltransferase 1                                                                                                   | NP_001598               | 1.62        | 0.023554  | Cytoplasm | enzyme | 30                       |
| <b>ACAA2</b>                                     | 3-ketoacyl coa thiolase, 3-OXOACYL-COA THIOLASE, 0610011L04Rik, AI255831, AI265397, D18Ert240e, DSAEC, FLJ35992, FLJ95265, T1                                                                                                                             | acetyl-Coenzyme A acyltransferase 2                                                                                                   | NP_006102               | 1.34        | 0.10984   | Cytoplasm | enzyme | 10449                    |
| <b>ACAD9</b>                                     | 2600017P15RIK, 4732402K02, C630012L17RIK, FLJ23533, MGC14452, NPD002, NYGGF2                                                                                                                                                                              | acyl-Coenzyme A dehydrogenase family, member 9                                                                                        | NP_054768               | 1.23        | 0.21954   | Cytoplasm | enzyme | 28976                    |
| <b>ACADM</b>                                     | ACAD1, Acetyl coenzyme a dehydrogenase, medium chain, Acetyl-Coenzyme A Dehydrogenase, Acyl-CoA dehydrogenase, medium chain, AU018656, FLJ18227, FLJ93013, FLJ99884, MCAD, MCADH, MEDIUM-CHAIN FATTY ACYL-COA DEHYDROGENASE                               | acyl-Coenzyme A dehydrogenase, C-4 to C-12 straight chain                                                                             | NP_001120800            | 1.33        | 0.16878   | Cytoplasm | enzyme | 34                       |
| <b>ACADVL</b>                                    | ACAD6, LCACD, MGC93660, VERY LONG-CHAIN FATTY ACYL-COA DEHYDROGENASE, VLACD, VLCAD                                                                                                                                                                        | acyl-Coenzyme A dehydrogenase, very long chain                                                                                        | NP_000009               | -1.04       | 0.43264   | Cytoplasm | enzyme | 37                       |
| <b>ACAT1</b>                                     | 3-Ketothiolase, 6330585C21Rik, AA CoA Thiolase, ACAT, Acetyl-CoA acetyltransferase 1, Acyl-coa acetyltransferase, Acyl-coa acetyltransferase 1, MAT, RATACAL, T2, THIL                                                                                    | acetyl-Coenzyme A acetyltransferase 1                                                                                                 | NP_000010               | 1.65        | 0.0050079 | Cytoplasm | enzyme | 38                       |
| <b>ACAT2</b>                                     | Ab2-076, Acat3, Acetoacetyl Coa Thiolase, ACETOENZYME A ACETYLTRANSFERASE 2, ACTL, AW742799, MGC95138, Similar to tcp1x, T2, Tcp-1x, Tcp-x1, Tcp1-rs1                                                                                                     | acetyl-Coenzyme A acetyltransferase 2                                                                                                 | NP_005882               | 1.23        | 0.19111   | Cytoplasm | enzyme | 39                       |
| <b>ALDH2</b>                                     | Ahd-5, Aldehyde dehydr 2,A2, ALDH-E2, ALDH1, ALDM, Hepatic aldehyde dehydrogenase 2, MGC1806                                                                                                                                                              | aldehyde dehydrogenase 2 family (mitochondrial)                                                                                       | NP_000681               | 1.22        | 0.20106   | Cytoplasm | enzyme | 217                      |
| <b>ALDH4A1</b>                                   | A930035F14Rik, Ahd-1, ALDH4, Aldh5a1, DKFZp779M035, E330022C09, P5CD, P5CDh, P5cdhl, P5cdhs, Ssdh1                                                                                                                                                        | aldehyde dehydrogenase 4 family, member A1                                                                                            | NP_003739               | 1.53        | 0.080166  | Cytoplasm | enzyme | 8659                     |
| <b>ALDH7A1</b>                                   | Aldehyde dehydrogenase family 7 member a1, antiquitin, ATQ1, D18Wsu181e, EPD, FLJ11738, FLJ92814, PDE                                                                                                                                                     | aldehyde dehydrogenase 7 family, member A1                                                                                            | NP_001173               | 1.21        | 0.21109   | Cytoplasm | enzyme | 501                      |
| <b>ALDH9A1</b>                                   | 4-Trimethylaminobutyraldehyde Dehydrogenase 9a, AA139417, Abaldh, ALDH4, ALDH7, ALDH9, E3, ESTM40, TMABA-DH                                                                                                                                               | aldehyde dehydrogenase 9 family, member A1                                                                                            | NP_000687               | 1.18        | 0.23452   | Cytoplasm | enzyme | 223                      |
| <b>BCAT1</b>                                     | BCATc, BCT1, DKFZp686E12175, ECA39, MECA39, MGC105472, PNAS-121, PP18                                                                                                                                                                                     | branched chain aminotransferase 1, cytosolic                                                                                          | NP_005495               | -1.01       | 0.49371   | Cytoplasm | enzyme | 586                      |
| <b>ECH1</b>                                      | AA617331, Delta(3,5)-Delta(2,4)-dienoyl-CoA isomerase, mitochondrial, Delta(3,5)-Delta(2,4)-dienoyl-CoA isomerase, peroxisomal, HIP11, HPXEL, MGC107274, Mitochondrial dienoyl-coa isomerase, Perox enolhydratase, Peroxisomal enoyl hydratase-like, Pxel | enoyl Coenzyme A hydratase 1, peroxisomal                                                                                             | NP_001389               | -1.04       | 0.4027    | Cytoplasm | enzyme | 1891                     |
| <b>ECHS1</b>                                     | C80529, Enoyl-CoA hydratase, short-chain, 1, mitochondrial, SCEH                                                                                                                                                                                          | enoyl Coenzyme A hydratase, short chain, 1, mitochondrial                                                                             | NP_004083               | 1.34        | 0.11116   | Cytoplasm | enzyme | 1892                     |
| <b>HADH</b>                                      | 3 Hydroxyacyl Coenzyme A Dehydrogenase, 3-hydroxyacyl-coa dehydrogenase, AA409008, AU019341, AW742602, Beta-3 Hydroxyacyl Coenzyme A Dehydrogenase, HAD, HADH1, HADHSC, HHF4, M/SCHAD, MGC8392, SCHAD                                                     | hydroxyacyl-Coenzyme A dehydrogenase                                                                                                  | NP_005318               | 1.09        | 0.37321   | Cytoplasm | enzyme | 3033                     |
| <b>HADHA</b>                                     | C77020, ECHA, Enoyl-CoA Hydratase, GBP, HADH, LCHAD, MGC1728, MGC105338, Mitochondrial long chain enoyl CoA hydratase, Mitochondrial trifunctional protein alpha, MTPA, RGD1560655, TP-ALPHA                                                              | hydroxyacyl-Coenzyme A dehydrogenase/3-ketoacyl-Coenzyme A thiolase/enoyl-Coenzyme A hydratase (trifunctional protein), alpha subunit | NP_000173               | 1.46        | 0.025326  | Cytoplasm | enzyme | 3030                     |
| <b>HADHB</b>                                     | 3-ketoacyl-CoA thiolase, 4930479F15Rik, A hydratase (trifunctional protein), beta subunit, ECHB, Gm13910, LOC100048492, MGC87480, Mitochondrial long chain 3-ketoacyl-CoA thiolase, MSTP029, Mtpb, OTTMUSG00000015054, TP-BETA                            | hydroxyacyl-Coenzyme A dehydrogenase/3-ketoacyl-Coenzyme A thiolase/enoyl-Coenzyme A hydratase (trifunctional protein), beta subunit  | NP_000174               | 1.50        | 0.017067  | Cytoplasm | enzyme | 3032                     |

|                 |                                                                                                                                                                                                                      |                                                            |              |              |                 |           |        |       |
|-----------------|----------------------------------------------------------------------------------------------------------------------------------------------------------------------------------------------------------------------|------------------------------------------------------------|--------------|--------------|-----------------|-----------|--------|-------|
| <b>HIBADH</b>   | 6430402H10RIK, AI265272, MGC40361, NS5ATP1                                                                                                                                                                           | 3-hydroxyisobutyrate dehydrogenase                         | NP_689953    | <b>1.39</b>  | <b>0.097442</b> | Cytoplasm | enzyme | 11112 |
| <b>HMGCL</b>    | 3-Hydroxy-3-methylglutaryl coa lyase, AW476067, HL, HMG CoA lyase                                                                                                                                                    | 3-hydroxymethyl-3-methylglutaryl-Coenzyme A lyase          | HMGCL        | <b>-7.76</b> | <b>1.04E-17</b> | Cytoplasm | enzyme | 3155  |
| <b>HMGCS1</b>   | B130032C06Rik, HMGCS, Hydroxymethylglutaryl-CoA synthase, cytoplasmic, LOC100040592, MGC36662, MGC90332, MGC98430                                                                                                    | 3-hydroxy-3-methylglutaryl-Coenzyme A synthase 1 (soluble) | NP_001091742 | <b>2.20</b>  | <b>5.31E-04</b> | Cytoplasm | enzyme | 3157  |
| <b>HSD17B10</b> | 17b-HSD10, ABAD, Ads9, CAMR, DUPXp11.22, ERAB, HADH2, HCD2, Hydroxysteroid dehydrogenase 10, MHBD, MRPP2, MRX17, MRX31, MRXS10, SCHAD, SDR5C1, XH98G2                                                                | hydroxysteroid (17-beta) dehydrogenase 10                  | NP_004484    | <b>1.26</b>  | <b>0.16529</b>  | Cytoplasm | enzyme | 3028  |
| <b>HSD17B4</b>  | 17 beta Hydroxy Steroid Dehydrogenase Isoform 4, 17-BETA HSD4, 17[b]-HSD, AW208803, D-bifunctional, D-pbe, Dbf, DBP, HD, MFE-2, Mfp-2, NS1-l, perMFE-2, Ph, Pmeii, SDR8C1                                            | hydroxysteroid (17-beta) dehydrogenase 4                   | NP_000405    | <b>1.42</b>  | <b>0.075066</b> | Cytoplasm | enzyme | 3295  |
| <b>IVD</b>      | 1300016K07Rik, 6720455E18Rik, ACAD2, AI463340, FLJ12715, FLJ34849, Isovaleryl-Coa Dehydrogenase                                                                                                                      | isovaleryl Coenzyme A dehydrogenase                        | NP_002216    | <b>1.48</b>  | <b>0.055705</b> | Cytoplasm | enzyme | 3712  |
| <b>MUT</b>      | D230010K02RIK, MCM, MMCOAMUT, RGD1564912                                                                                                                                                                             | methylmalonyl Coenzyme A mutase                            | NP_000246    | <b>1.21</b>  | <b>0.25761</b>  | Cytoplasm | enzyme | 4594  |
| <b>OXCT1</b>    | 3-Oxoacid coa transferase, 2610008003Rik, LOC678860, LOC690109, LOC690163, MGC187935, OXCT, Oxct1 (predicted), Oxct2a, SCOT, Scot-s, Succinyl coa:3-ketoacid coa transferase, Succinyl COA:3-OXOACID COA TRANSFERASE | 3-oxoacid CoA transferase 1                                | NP_000427    | <b>-1.00</b> | <b>0.4867</b>   | Cytoplasm | enzyme | 5019  |

| PATHWAY: Biosynthesis of steroids |  | Entrez Gene Name | HUGO Gene Symbol/RefSeq | Fold Change | p-value | Location | Family | Entrez Gene ID for Human |
|-----------------------------------|--|------------------|-------------------------|-------------|---------|----------|--------|--------------------------|
|-----------------------------------|--|------------------|-------------------------|-------------|---------|----------|--------|--------------------------|

|              |                                                                                                                                                                                                                                                                                        |                                                                                                                 |              |              |                 |           |        |       |
|--------------|----------------------------------------------------------------------------------------------------------------------------------------------------------------------------------------------------------------------------------------------------------------------------------------|-----------------------------------------------------------------------------------------------------------------|--------------|--------------|-----------------|-----------|--------|-------|
| <b>FDFT1</b> | DGPT, ERG9, FARNESYL DIPHOSPHATE FARNESYL TRANSFERASE, Farnesyl diphosphate farnesyl transferase 1, Fpp farnesyl transferase 1, MGC93486, SQS, SQUALENE SYNTHASE, Squalene Synthetase, SS                                                                                              | farnesyl-diphosphate farnesyltransferase 1                                                                      | NP_004453    | <b>4.23</b>  | <b>6.01E-10</b> | Cytoplasm | enzyme | 2222  |
| <b>FDPS</b>  | 6030492I17Rik, Ac2-125, AI256750, FARNESYL DIPHOSPHATE SYNTHASE, FARNESYL PYROPHOSPHATE SYNTHASE, Fdps1, FPP SYNTHASE, FPP synthetase, FPPS, FPS, KIAA1293, MGC107162, mKIAA1293                                                                                                       | farnesyl diphosphate synthase (farnesyl pyrophosphate synthetase, dimethylallyltransferase, geranyltransferase) | NP_001129293 | <b>1.70</b>  | <b>0.014711</b> | Cytoplasm | enzyme | 2224  |
| <b>IDI1</b>  | 4832416K17Rik, IDP ISOMERASE, IPP1, Ipp delta isomerase, IPP ISOMERASE, IPP isomerase 1, IPP11, Isopentenyl diphosphate:dimethylallyl diphosphate isomerase, ISOPENTENYL PYROPHOSPHATE ISOMERASE, MGC8139, MGC108635, MGC118013, Similar to isopentenyl-diphosphate delta isomerase    | isopentenyl-diphosphate delta isomerase 1                                                                       | NP_004499    | <b>2.92</b>  | <b>3.62E-06</b> | Cytoplasm | enzyme | 3422  |
| <b>LSS</b>   | 2,3-OXIDOSQUALENE-LANOSTEROL CYCLASE, 2810025N20Rik, BC029082, D10Etd116e, FLJ25486, FLJ35015, FLJ39450, FLJ46393, LANOSTEROL CYCLASE, LANOSTEROL SYNTHASE. MGC27893. OSC C78718, diphosphomevalonate decarboxylase, Erg19, FP17780, MEVALONATE PYROPHOSPHATE DECARBOXYLASE. MPD. Mvpd | lanosterol synthase (2,3-oxidosqualene-lanosterol cyclase)                                                      | NP_001001438 | <b>1.63</b>  | <b>0.022782</b> | Cytoplasm | enzyme | 4047  |
| <b>MVD</b>   | MEVALONATE PYROPHOSPHATE DECARBOXYLASE. MPD. Mvpd                                                                                                                                                                                                                                      | mevalonate (diphospho) decarboxylase                                                                            | NP_002452    | <b>1.68</b>  | <b>0.016721</b> | Cytoplasm | enzyme | 4597  |
| <b>NQO2</b>  | DHQV, DIA6, MGC94180, NMO2, NMOR2, Ox-2, QR2                                                                                                                                                                                                                                           | dehydrogenase, quinone 2                                                                                        | NP_000895    | <b>1.05</b>  | <b>0.42868</b>  | Cytoplasm | enzyme | 4835  |
| <b>PMVK</b>  | 1110011E12RIK, 2900002L22Rik, AV001327, HUMPMKI, MGC105660, PHOSPHOMEVALONATE KINASE, PMK, PMKA, PMKASE, PMKI                                                                                                                                                                          | phosphomevalonate kinase                                                                                        | NP_006547    | <b>-1.03</b> | <b>0.41846</b>  | Cytoplasm | kinase | 10654 |

| PATHWAY: Granzyme A signalling |  | Entrez Gene Name | HUGO Gene Symbol/RefSeq | Fold Change | p-value | Location | Family | Entrez Gene ID for Human |
|--------------------------------|--|------------------|-------------------------|-------------|---------|----------|--------|--------------------------|
|--------------------------------|--|------------------|-------------------------|-------------|---------|----------|--------|--------------------------|

|                 |                                                                                                                                                                                              |                                                                  |              |              |                  |         |                         |      |
|-----------------|----------------------------------------------------------------------------------------------------------------------------------------------------------------------------------------------|------------------------------------------------------------------|--------------|--------------|------------------|---------|-------------------------|------|
| <b>ANP32A</b>   | Anp32, C15orf1, I1PP2A, LANP, LNAP, MAPM, MGC105504, MGC119787, MGC150373, PHAP1, PHAPI, PP32, PUTATIVE HLA CLASS II ASSOCIATED PROTEIN I, PUTATIVEHLA CLASS II ASSOCIATED PROTEIN I, W91701 | acidic (leucine-rich) nuclear phosphoprotein 32 family, member A | NP_006296    | <b>1.27</b>  | <b>0.17621</b>   | Nucleus | other                   | 8125 |
| <b>APEX1</b>    | APE, APE-1, APEN, APEX, APEX NUCLEASE, APX, HAP1, REF-1                                                                                                                                      | APEX nuclease (multifunctional DNA repair enzyme) 1              | NP_001632    | <b>1.12</b>  | <b>0.31404</b>   | Nucleus | enzyme                  | 328  |
| <b>GAAD</b>     | AL024257, AWD, GAAD, NB, NBS, NDKA, NDPK-A, NM23, NM23-H1, NM23-M1, NM23A, Nucleotide diphosphate kinase beta                                                                                | non-metastatic cells 1, protein (NM23A) expressed in             | NP_937818    | <b>1.02</b>  | <b>0.4395</b>    | Nucleus | kinase                  | 4830 |
| <b>H1F0</b>     | D130017D06Rik, H10, H1(0), H1FV, Histone h1, HISTONE H1-0, MGC5241, MGC19309, MGC98218, MGC117919                                                                                            | H1 histone family, member 0                                      | NP_005309    | <b>-1.54</b> | <b>0.03801</b>   | Nucleus | other                   | 3005 |
| <b>HIST1H1B</b> | H1, H1.5, H1B, H1F5, H1s-3, LOC682425, MGC126630, MGC126632                                                                                                                                  | histone cluster 1, H1b                                           | NP_005313    | <b>-2.03</b> | <b>9.01E-05</b>  | Nucleus | other                   | 3009 |
| <b>HIST1H1C</b> | 0610008C09Rik, H1.2, H1c, H1F2, H1var1, His1a, Histone h1, member 2, Histone h1.2, MGC3992, MGC107646                                                                                        | histone cluster 1, H1c                                           | NP_005310    | <b>-1.89</b> | <b>3.48E-05</b>  | Nucleus | other                   | 3006 |
| <b>HMG2</b>     | C80539, High mobility group 2, HMG-2, MGC103184, MGC108899, MGC125103, RGD1564519                                                                                                            | high-mobility group box 2                                        | NP_001124160 | <b>-1.79</b> | <b>0.0083483</b> | Nucleus | transcription regulator | 3148 |

|              |                                                                                                                                                                                        |                                              |           |              |                |           |             |      |
|--------------|----------------------------------------------------------------------------------------------------------------------------------------------------------------------------------------|----------------------------------------------|-----------|--------------|----------------|-----------|-------------|------|
| <b>IGAAD</b> | 2PP2A, 2610030F17Rik, 5730420M11Rik, AA407739, Ab1-115, ENSMUSG00000079225, Gm9531, I2PP2A, IGAAD, IPP2A2, MGC118419, PHAPII, Stf-IT-1, TAF-I, TAF-IBETA, Template activating factor-1 | SET nuclear oncogene                         | NP_003002 | <b>1.03</b>  | <b>0.42211</b> | Nucleus   | phosphatase | 6418 |
| <b>NME3</b>  | 1810009F08Rik, AI413736, c371H6.2, DR-NM23, KIAA0516, Ndk3, NDPK-C, Nm23-DR, NM23-H3, Nm23-M3                                                                                          | non-metastatic cells 3, protein expressed in | NP_002504 | <b>1.14</b>  | <b>0.32251</b> | Cytoplasm | kinase      | 4832 |
| <b>RP2</b>   | AI662636, DELXp11.3, KIAA0215, NME10, RGD1565124, Rp2h, TBCCD2, XRP2                                                                                                                   | retinitis pigmentosa 2 (X-linked recessive)  | NP_008846 | <b>-1.03</b> | <b>0.47459</b> | Cytoplasm | enzyme      | 6102 |

| PATHWAY: Oxidative Phosphorylation |                                                                                                                                                                                                                                                                                                                                 | Entrez Gene Name                                                                         | HUGO Gene Symbol/RefSeq | Fold Change | p-value         | Location  | Family      | Entrez Gene ID for Human |
|------------------------------------|---------------------------------------------------------------------------------------------------------------------------------------------------------------------------------------------------------------------------------------------------------------------------------------------------------------------------------|------------------------------------------------------------------------------------------|-------------------------|-------------|-----------------|-----------|-------------|--------------------------|
| <b>ATP5A1</b>                      | AI035633, AL022851, AL023067, ALPHA SUBUNIT OF THE F1FO ATP SYNTHASE (COMPLEX V), Atp synthase (f0f1), subunit alpha, Atp synthase alpha chain, ATP SYNTHASE ALPHA SUBUNIT, ATP Synthase F1 alpha, ATP synthase mitochondrial f1complex, ATP5A, ATP5AL2, ATPM, D18ErtD206e, F1 atpase, hATP1, MGC139059, MOM2, OMR, ORM, Q3u452 | ATP synthase, H+ transporting, mitochondrial F1 complex, alpha subunit 1, cardiac muscle | NP_001001937            | <b>1.27</b> | <b>0.10129</b>  | Cytoplasm | transporter | 498                      |
| <b>ATP5B</b>                       | ATP Synthase Beta, ATP Synthase F1 Beta, Atpd, ATPMB, ATPSB, Beta atp synthase, BETA SUBUNIT ATP SYNTHASE, F1 Atp Synthase beta, F1 ATPASE BETA, F1 BETA ATPASE, H+ ATP Synthase Beta, MGC5231, OXPHOS COMPLEX V, SUBUNIT B                                                                                                     | ATP synthase, H+ transporting, mitochondrial F1 complex, beta polypeptide                | NP_001677               | <b>1.28</b> | <b>0.098157</b> | Cytoplasm | transporter | 506                      |
| <b>ATP5C1</b>                      | 1700094F02Rik, ATP5C, ATP5CL1, F1 gamma, GAMMA SUBUNIT F1FO ATPASE                                                                                                                                                                                                                                                              | ATP synthase, H+ transporting, mitochondrial F1 complex, gamma polypeptide 1             | NP_005165               | <b>1.17</b> | <b>0.19897</b>  | Cytoplasm | transporter | 509                      |
| <b>ATP5D</b>                       | 0610008F14RIK, 1500000I11Rik, AA960090, AI876556, ATP Synthase F1 Delta, Atpase D, AU020773, C85518, F1FO ATPase delta                                                                                                                                                                                                          | ATP synthase, H+ transporting, mitochondrial F1 complex, delta subunit                   | NP_001001975            | <b>1.39</b> | <b>0.096273</b> | Cytoplasm | transporter | 513                      |
| <b>ATP5F1</b>                      | C76477, MGC24431, PIG47                                                                                                                                                                                                                                                                                                         | ATP synthase, H+ transporting, mitochondrial F0 complex, subunit B1                      | NP_001679               | <b>1.19</b> | <b>0.17187</b>  | Cytoplasm | transporter | 515                      |
| <b>ATP5H (includes EG:10476)</b>   | 0610009D10RIK, Atp synthase d subunit, ATP Synthase Subunit D, ATP5H, ATP5JD, ATPQ, RGD1559626                                                                                                                                                                                                                                  | ATP synthase, H+ transporting, mitochondrial F0 complex, subunit d                       | NP_006347               | <b>1.20</b> | <b>0.21424</b>  | Cytoplasm | transporter | 10476                    |
| <b>ATP5O</b>                       | Atp Synthase, H+ Transporting, Mitochondrial F1 Complex, O Subunit, Atp synthase-mitochondrial f1, ATPO, D12Wsu28e, EG432676, MGC72688, OSCP                                                                                                                                                                                    | ATP synthase, H+ transporting, mitochondrial F1 complex, O subunit                       | NP_001688               | <b>1.19</b> | <b>0.17799</b>  | Cytoplasm | transporter | 539                      |
| <b>ATP6AP1</b>                     | 16A, AC45, AI316502, ATP6IP1, ATP6S1, AW108110, C7-1, CF2, FLJ00383, mFLJ00383, MGC129781, ORF, V-ATPase S1 subunit, Vacuolar ATP synthase subunit s1, VATPS1, XAP-3                                                                                                                                                            | ATPase, H+ transporting, lysosomal accessory protein 1                                   | NP_001174               | <b>1.14</b> | <b>0.32827</b>  | Cytoplasm | transporter | 537                      |
| <b>ATP6V0D1</b>                    | Ac39, AI267038, ATP6D, ATP6DV, FLJ43534, LOC100132855, P39, Physophilin, VATX, VMA6, VPATPD                                                                                                                                                                                                                                     | ATPase, H+ transporting, lysosomal 38kDa, V0 subunit d1                                  | NP_004682               | <b>1.33</b> | <b>0.1144</b>   | Cytoplasm | transporter | 9114                     |
| <b>ATP6V1A</b>                     | AI647066, ATP6A1, Atp6a2, ATP6V1A1, ATPase Vacuolar Subunit A, HO68, VA68, Vaa1, V ATPase 70 kd a subunit, Vma1, VPP2                                                                                                                                                                                                           | ATPase, H+ transporting, lysosomal 70kDa, V1 subunit A                                   | NP_001681               | <b>1.49</b> | <b>0.019803</b> | Cytoplasm | transporter | 523                      |
| <b>ATP6V1B2</b>                    | AI194269, AI790362, ATP6B2, ATP6B1B2, Atpase H+ Transporting Lysosomal Isoform 2, HO57, R74844, V-ATPASE B2, VATB, Vma2, VPP3                                                                                                                                                                                                   | ATPase, H+ transporting, lysosomal 56/58kDa, V1 subunit B2                               | NP_001684               | <b>1.61</b> | <b>0.0251</b>   | Cytoplasm | transporter | 526                      |
| <b>ATP6V1C1</b>                    | 1700025B18Rik, ATP6C, ATP6D, FLJ20057, MGC109315, MGC140015, U13839, V-ATPase c, VATC, Vma5                                                                                                                                                                                                                                     | ATPase, H+ transporting, lysosomal 42kDa, V1 subunit C1                                  | NP_001686               | <b>1.76</b> | <b>0.010395</b> | Cytoplasm | transporter | 528                      |
| <b>ATP6V1D</b>                     | 1110004P10Rik, ATP6M, Vacuolar ATPase Subunit D, VACUOLAR H ATPASE SUBUNIT D, VATD, VMA8                                                                                                                                                                                                                                        | ATPase, H+ transporting, lysosomal 34kDa, V1 subunit D                                   | NP_057078               | <b>1.06</b> | <b>0.44172</b>  | Cytoplasm | transporter | 51382                    |
| <b>ATP6V1E1</b>                    | 2410029D23Rik, ATP6E, ATP6E2, ATP6V1E, D6ErtD385e, E2, H+ Atpase E, MGC72933, P31, V-ATPASE E, Vacuolar H+ATPase 31kDa, Vma4                                                                                                                                                                                                    | ATPase, H+ transporting, lysosomal 31kDa, V1 subunit E1                                  | NP_001687               | <b>1.49</b> | <b>0.048933</b> | Cytoplasm | transporter | 529                      |
| <b>ATP6V1G1</b>                    | 1810024D14Rik, AA960677, Atp synthase g1, ATP6G, ATP6G1, ATP6GL, ATP6J, DKFZp547P234, VAG1, Vma10                                                                                                                                                                                                                               | ATPase, H+ transporting, lysosomal 13kDa, V1 subunit G1                                  | NP_004879               | <b>1.62</b> | <b>0.02471</b>  | Cytoplasm | transporter | 9550                     |
| <b>COX4I1</b>                      | AL024441, COX4, COX4A, COXIV, CYTOCHROME OXIDASE SUBUNIT IV, MGC72016, MGC105470                                                                                                                                                                                                                                                | cytochrome c oxidase subunit IV isoform 1                                                | NP_001852               | <b>1.35</b> | <b>0.10692</b>  | Cytoplasm | enzyme      | 1327                     |
| <b>COX5A</b>                       | AA959768, CcOX, COX, COX-VA, Cytochrome c oxidase subunit va, Mitochondrial Cytochrome C Oxidase Va, VA                                                                                                                                                                                                                         | cytochrome c oxidase subunit Va                                                          | NP_004246               | <b>1.16</b> | <b>0.30688</b>  | Cytoplasm | enzyme      | 9377                     |
| <b>CYC1</b>                        | 2610002H19Rik, AA408921, Cytochrome c1, MGC134266, UQCR4                                                                                                                                                                                                                                                                        | cytochrome c-1                                                                           | NP_001907               | <b>1.32</b> | <b>0.1793</b>   | Cytoplasm | enzyme      | 1537                     |

|                                           |                                                                                                                                                                                                                                                      |                                                                                                  |              |              |                 |           |        |        |
|-------------------------------------------|------------------------------------------------------------------------------------------------------------------------------------------------------------------------------------------------------------------------------------------------------|--------------------------------------------------------------------------------------------------|--------------|--------------|-----------------|-----------|--------|--------|
| <b>NDUFA10<br/>(includes<br/>EG:4705)</b> | 2900053E13Rik, CI-42KD, Complex I-42KD, FLJ21923, MGC5103, Nadh dehydrogenase [ubiquinone] 1 alpha subcomplex subunit 10, NDUFA10, Ndufa10l1                                                                                                         | NADH<br>dehydrogenase<br>(ubiquinone) 1 alpha<br>subcomplex, 10,<br>42kDa                        | NP_004535    | <b>1.20</b>  | <b>0.25345</b>  | Cytoplasm | enzyme | 4705   |
| <b>NDUFA13</b>                            | 2700054G14Rik, AU022060, B16.6, CDA016, CGI-39, FLJ58045, FLJ59191, GRIM-19, RGD1565358                                                                                                                                                              | NADH<br>dehydrogenase<br>(ubiquinone) 1 alpha<br>subcomplex, 13                                  | NP_057049    | <b>1.41</b>  | <b>0.12832</b>  | Cytoplasm | enzyme | 51079  |
| <b>NDUFA8</b>                             | 0610033L03Rik, Aa2-258, AW261656, CI-19KD, CI-PGIV, Complex I-19KD, Complex I-PGIV, MGC793, PGIV                                                                                                                                                     | NADH<br>dehydrogenase<br>(ubiquinone) 1 alpha<br>subcomplex, 8,<br>19kDa                         | NP_055037    | <b>1.72</b>  | <b>0.013275</b> | Cytoplasm | enzyme | 4702   |
| <b>NDUFA9<br/>(includes<br/>EG:4704)</b>  | 39 Kda, ci, 1010001N11Rik, Complex I-39KD, MGC111043, NADH UBIQUINONE OXYDOREDUCTASE, ND39, NDUFA9, NDUFS2L, SDR22E1                                                                                                                                 | NADH<br>dehydrogenase<br>(ubiquinone) 1 alpha<br>subcomplex, 9,<br>39kDa                         | NP_004993    | <b>1.42</b>  | <b>0.082609</b> | Cytoplasm | enzyme | 4704   |
| <b>NDUFB10</b>                            | 22kDa, 0610011B04Rik, Complex I-PDSW, LOC681867, PDSW                                                                                                                                                                                                | NADH<br>dehydrogenase<br>(ubiquinone) 1 beta<br>subcomplex, 10,<br>22kDa                         | NP_004539    | <b>1.14</b>  | <b>0.32751</b>  | Cytoplasm | enzyme | 4716   |
| <b>NDUFB5</b>                             | 0610007D05Rik, AU015782, CISGDH, Complex I-SGDH, DKFZp686N02262, FLJ30597, MGC12314, MGC111204, Nadh, SGDH                                                                                                                                           | NADH<br>dehydrogenase<br>(ubiquinone) 1 beta<br>subcomplex, 5,<br>16kDa                          | NP_002483    | <b>1.38</b>  | <b>0.1424</b>   | Cytoplasm | enzyme | 4711   |
| <b>NDUFB7</b>                             | 1110002H15Rik, B18, CI-B18, MGC2480, NADH DEHYDROGENASE (UBIQUINONE) 1 BETA SUBCOMPLEX, 7, 18KDA, SQM1, UBIQUINONE OXIDOREDUCTASE                                                                                                                    | NADH<br>dehydrogenase<br>(ubiquinone) 1 beta<br>subcomplex, 7,<br>18kDa                          | NP_004137    | <b>1.93</b>  | <b>0.015804</b> | Cytoplasm | enzyme | 4713   |
| <b>NDUFB9</b>                             | 1190008J14Rik, B22, Complex I-B22, DKFZp566O173, FLJ22885, LYRM3, NADH Dehydrogenase (Ubiquinone) 1 Beta B22 Subunit, Nadh Ubiquinone Oxidoreductase B22 Subunit, Nadh-Q Oxidoreductase B22, UQOR22                                                  | NADH<br>dehydrogenase<br>(ubiquinone) 1 beta<br>subcomplex, 9,<br>22kDa                          | NP_004996    | <b>1.40</b>  | <b>0.13454</b>  | Cytoplasm | enzyme | 4715   |
| <b>NDUFS1</b>                             | 5830412M15RIK, 9930026A05Rik, CI-75Kd, MGC7850, MGC19199, MGC26839, MGC93795, MITOCHONDRIAL COMPLEX I 75-KDA SUBUNIT, NADH dehydrogenase precursor, 75kDa subunit, Nadh Ubiquinone Oxidoreductase 75 Kda Subunit, NADH-coenzyme Q reductase, PRO1304 | NADH<br>dehydrogenase<br>(ubiquinone) Fe-S<br>protein 1, 75kDa<br>(NADH-coenzyme Q<br>reductase) | NP_004997    | <b>1.48</b>  | <b>0.051719</b> | Cytoplasm | enzyme | 4719   |
| <b>NDUFS2</b>                             | AL033311, Complex I-49KD, MGC27667, Nadh Ubiquinone Oxidoreductase 49 Kda Subunit, Nadh-coenzyme q reductase                                                                                                                                         | NADH<br>dehydrogenase<br>(ubiquinone) Fe-S<br>protein 2, 49kDa<br>(NADH-coenzyme Q<br>reductase) | NP_004541    | <b>1.49</b>  | <b>0.049889</b> | Cytoplasm | enzyme | 4720   |
| <b>NDUFS3</b>                             | 30 Kda, ci, 0610010M09Rik, Gm12251, NADH Dehydrogenase 30kDa, NADH-UBIQUINONE REDUCTASE, OTTMUSG00000005734                                                                                                                                          | NADH<br>dehydrogenase<br>(ubiquinone) Fe-S<br>protein 3, 30kDa<br>(NADH-coenzyme Q<br>reductase) | NP_004542    | <b>1.39</b>  | <b>0.084917</b> | Cytoplasm | enzyme | 4722   |
| <b>NDUFS4</b>                             | 18 kda subunit of complex i, 6720411N02RIK, AQDQ, C1-18k, CI-18 kDa, Complex I-18 kDa                                                                                                                                                                | NADH<br>dehydrogenase<br>(ubiquinone) Fe-S<br>protein 4, 18kDa<br>(NADH-coenzyme Q<br>reductase) | NP_002486    | <b>1.67</b>  | <b>0.017814</b> | Cytoplasm | enzyme | 4724   |
| <b>NDUFS7</b>                             | 1010001M04Rik, CI-20KD, FLJ45860, FLJ46880, MGC105684, MGC120002, MY017, NADH-coenzyme Q reductase, PSST                                                                                                                                             | NADH<br>dehydrogenase<br>(ubiquinone) Fe-S<br>protein 7, 20kDa<br>(NADH-coenzyme Q<br>reductase) | NP_077718    | <b>1.22</b>  | <b>0.24648</b>  | Cytoplasm | enzyme | 374291 |
| <b>NDUFV1</b>                             | CI51KD, FLJ59059, MGC94599, MITOCHONDRIAL COMPLEX 1-51KDA SUBUNIT, NADH DEHYDROGENASE 51KD, ND51, UQOR1                                                                                                                                              | NADH<br>dehydrogenase<br>(ubiquinone)<br>flavoprotein 1,<br>51kDa                                | NP_009034    | <b>1.37</b>  | <b>0.1062</b>   | Cytoplasm | enzyme | 4723   |
| <b>NDUFV2</b>                             | 24KDA SUBUNIT-MITOCHONDRIAL COMPLEX 1, 2900010C23Rik                                                                                                                                                                                                 | NADH<br>dehydrogenase<br>(ubiquinone)<br>flavoprotein 2,<br>24kDa                                | NP_066552    | <b>1.30</b>  | <b>0.15677</b>  | Cytoplasm | enzyme | 4729   |
| <b>NDUFV3</b>                             | 1500032D16RIK, CI-9KD, MGC72817, Mipp65, MITOCHONDRIAL COMPLEX 1-10KDA SUBUNIT, Ndufv3l                                                                                                                                                              | NADH<br>dehydrogenase<br>(ubiquinone)<br>flavoprotein 3,<br>10kDa                                | NP_066553    | <b>-1.04</b> | <b>0.39126</b>  | Cytoplasm | enzyme | 4731   |
| <b>PPA1</b>                               | 2010317E03RIK, IOPPP, MGC111556, PP, PP1, Pyp, pyp rattus protein, Pyrophosphatase Inorganic, Pyrophosphatase inorganic 1, Pyrophosphate Phosphohydrolase, SID6-8061                                                                                 | pyrophosphatase<br>(inorganic) 1                                                                 | NP_066952    | <b>1.08</b>  | <b>0.36341</b>  | Cytoplasm | enzyme | 5464   |
| <b>PPA2</b>                               | 1110013G13Rik, FLJ20459, HSPC124, MGC6539, MGC49850, RGD1307965, SID6-306                                                                                                                                                                            | pyrophosphatase<br>(inorganic) 2                                                                 | NP_001029363 | <b>1.45</b>  | <b>0.06787</b>  | Cytoplasm | enzyme | 27068  |
| <b>SDHA</b>                               | 1500032O14RIK, 2310034D06Rik, 4921513A11, C81073, FP, SDH1, SDH2, SDHF, Succinate dehydrogenase complex, subunit A flavoprotein (Fp), Succinate-ubiquinone oxidoreductase 70-kda subunit                                                             | succinate<br>dehydrogenase<br>complex, subunit A,<br>flavoprotein (Fp)                           | NP_004159    | <b>1.06</b>  | <b>0.40684</b>  | Cytoplasm | enzyme | 6389   |



| <b>SDHB</b>                            | 0710008N11Rik, FLJ92337, IP, PCHC, PGL4, SDH, SDH1, SDH2, SDHIP, Succinate Dehydrogenase Cytochrome B Subunit, Succinate Dehydrogenase Ip Cytochrome B Subunit, Succinate dehydrogenase putative iron sulfur subunit                                                                                                        | succinate dehydrogenase complex, subunit B, iron sulfur (Ip)       | NP_002991               | <b>1.09</b>  | <b>0.39702</b>   | Cytoplasm       | enzyme    | 6390                     |
|----------------------------------------|-----------------------------------------------------------------------------------------------------------------------------------------------------------------------------------------------------------------------------------------------------------------------------------------------------------------------------|--------------------------------------------------------------------|-------------------------|--------------|------------------|-----------------|-----------|--------------------------|
| <b>UQCRB</b>                           | 2210415M14Rik, FLJ92016, FLJ97033, LOC685596, LOC687741, LOC690049, MGC35665, MGC107639, QCR7, QP-C, UQBC, UQBP, UQCR6, Uqcrbl, UQPC                                                                                                                                                                                        | ubiquinol-cytochrome c reductase binding protein                   | NP_006285               | <b>-1.21</b> | <b>0.22263</b>   | Cytoplasm       | enzyme    | 7381                     |
| <b>UQCRC1</b>                          | 1110032G10Rik, COR1, D3S3191, MGC93712, MGC97899, QCR1, Ubiquinol cytochrome c reductase 1, Ubiquinol Cytochrome C Reductase Core 1, UQCR1                                                                                                                                                                                  | ubiquinol-cytochrome c reductase core protein I                    | NP_003356               | <b>1.26</b>  | <b>0.11012</b>   | Cytoplasm       | enzyme    | 7384                     |
| <b>UQCRC2</b>                          | 1500004O06Rik, AURA11, CORE PROTEIN 2 OF COMPLEX III, MGC94368, Mitochondrial Core Protein2, QCR2, Ubiquinol Cytochrome C Reductase Core Protein 2, Ubiquinol Cytochrome C Reductase Core Protein 2 Precursor, UQCR2                                                                                                        | ubiquinol-cytochrome c reductase core protein II                   | NP_003357               | <b>1.33</b>  | <b>0.067677</b>  | Cytoplasm       | enzyme    | 7385                     |
| <b>UQCRFS1</b>                         | 4430402G14Rik, AI875505, FE-S COX3 SUBUNIT, Fes subunit of complex iii, LRRGT00195, MGC105530, RIP1, RIS1, RISP, UBIQUINOL CYTOCHROME C REDUCTASE, UQCR5                                                                                                                                                                    | ubiquinol-cytochrome c reductase, Rieske iron-sulfur polypeptide 1 | NP_005994               | <b>1.14</b>  | <b>0.285</b>     | Cytoplasm       | enzyme    | 7386                     |
| <b>PATHWAY: Glutathione metabolism</b> |                                                                                                                                                                                                                                                                                                                             |                                                                    |                         |              |                  |                 |           |                          |
| Symbol                                 | Synonym(s)                                                                                                                                                                                                                                                                                                                  | Entrez Gene Name                                                   | HUGO Gene Symbol/RefSeq | Fold Change  | p-value          | Location        | Family    | Entrez Gene ID for Human |
| <b>ANPEP</b>                           | AAP, AMINOPEPTIDASE M, AMINOPEPTIDASE N, APM, APN, CD13, GP150, Kidney Aminopeptidase M, LAP1, P150, PEPN                                                                                                                                                                                                                   | alanyl (membrane) aminopeptidase                                   | NP_001141               | <b>1.32</b>  | <b>0.17802</b>   | Plasma Membrane | peptidase | 290                      |
| <b>G6PD</b>                            | G28A, G6PD1, G6PDX, Glucose-6-P Dehydrogenase, Gpdx                                                                                                                                                                                                                                                                         | glucose-6-phosphate dehydrogenase                                  | NP_000393               | <b>1.11</b>  | <b>0.28079</b>   | Cytoplasm       | enzyme    | 2539                     |
| <b>GCLC</b>                            | D9Wsu168e, GAMMA GCS HEAVY CHAIN, Gamma Glutamyl Cysteine Synthetase Light Subunit, Gamma Glutamylcysteine Synthetase, Gamma glutamylcysteine synthetase heavy subunit, GAMMA-GCS, GAMMA-GCSH, GCL, GCS, GCS, Catalytic, GCS-HS, GCSH, Ggcs-hs, GLCL, GLCL-H, GLCLC, Glutamate-Cysteine Ligase, Catalytic Subunit, MGC93006 | glutamate-cysteine ligase, catalytic subunit                       | NP_001489               | <b>1.65</b>  | <b>0.020921</b>  | Cytoplasm       | enzyme    | 2729                     |
| <b>GCLM</b>                            | AI649393, Gamma gclm, GAMMA GCS LIGHT CHAIN, Gamma glutamylcysteine synthase (regulatory), GAMMA GLUTAMYL-CYSTEINE SYNTHETASE, GCS1, Gcs Ls, Gcs, Regulatory, GCS-L, Gcsl, GLCLR, glutamat-cystein ligase, regulatory subunit, Glutamate-Cysteine Ligase, Modifier Subunit                                                  | glutamate-cysteine ligase, modifier subunit                        | NP_002052               | <b>1.18</b>  | <b>0.27621</b>   | Cytoplasm       | enzyme    | 2730                     |
| <b>GPX1</b>                            | AI195024, AL033363, CGPx, GLUTATHIONE PEROXIDASE LIKE, GPX, GSHPx, GSHPX1, MGC14399, MGC88245. See <i>apx1</i>                                                                                                                                                                                                              | glutathione peroxidase 1                                           | NP_000572               | <b>2.13</b>  | <b>8.71E-04</b>  | Cytoplasm       | enzyme    | 2876                     |
| <b>GPX8</b>                            | 2310016C16RIK, AU017063, RGD1307506, UNQ847                                                                                                                                                                                                                                                                                 | glutathione peroxidase 8 (putative)                                | NP_001008398            | <b>-1.23</b> | <b>0.14268</b>   | unknown         | enzyme    | 493869                   |
| <b>GSR</b>                             | AI325518, D8ErtD238e, GLUTATHIONE REDUCTASE, Gr, Gr-1, Gred, GRX, MGC78522                                                                                                                                                                                                                                                  | glutathione reductase                                              | NP_000628               | <b>1.40</b>  | <b>0.082832</b>  | Cytoplasm       | enzyme    | 2936                     |
| <b>GSS</b>                             | AI314904, Glutathione synthetase, GS-A/GS-B, Gsh synthetase, GSHS, MGC14098                                                                                                                                                                                                                                                 | glutathione synthetase                                             | NP_000169               | <b>1.09</b>  | <b>0.34442</b>   | Cytoplasm       | enzyme    | 2937                     |
| <b>GSTK1</b>                           | 0610025I19Rik, AW260476, DsbA-L, GST, GST13, GST class-kappa, GST13-13, GSTK1-1, GSTkappa, hGSTK1, LOC51064                                                                                                                                                                                                                 | glutathione S-transferase kappa 1                                  | NP_001137151            | <b>1.40</b>  | <b>0.080445</b>  | Cytoplasm       | enzyme    | 373156                   |
| <b>GSTM2</b>                           | 0610005A07Rik, AI894236, Cd203c, GST4, Gst Yb3, GSTA4, Gstb-2, GSTM, Gstm3, Gstm7, GSTM2-2, GTHMUS, MGC117303                                                                                                                                                                                                               | glutathione S-transferase mu 2 (muscle)                            | NP_000839               | <b>1.14</b>  | <b>0.28327</b>   | Cytoplasm       | enzyme    | 2946                     |
| <b>GSTM3 (includes EG:2947)</b>        | FSC2, GST5, Gst mu 5, GSTB, GSTM3, Gstm5, GSTM3-3, GTM3, MGC3310, MGC3704                                                                                                                                                                                                                                                   | glutathione S-transferase mu 3 (brain)                             | NP_000840               | <b>1.25</b>  | <b>0.11884</b>   | Cytoplasm       | enzyme    | 2947                     |
| <b>GSTO1</b>                           | AA407097, AI194287, AU018802, DKFZp686H13163, GSH-dependent DHA Reductase, GST HOMOLOG, GSTTlp28, GSTX, MGC94845, P28                                                                                                                                                                                                       | glutathione S-transferase omega 1                                  | NP_004823               | <b>1.19</b>  | <b>0.17462</b>   | Cytoplasm       | enzyme    | 9446                     |
| <b>GSTP1</b>                           | DFN7, FAEES3, GLUTATHIONE S TRANSFERASE PHI, GLUTATHIONE S-TRANSFERASE PI, Glutathione s-transferase, chain b, Gm3934, GST3, GST P1-1, GST PI, Gst pi-class subunit 7, Gst Yf, GST-P, Gst7-7, Gst7pi, Gstp2, GSTpiA, GstpiB, Lysyl Oxidase 2, MGC72668, MGC72669, PI                                                        | glutathione S-transferase pi 1                                     | NP_000843               | <b>1.04</b>  | <b>0.3933</b>    | Cytoplasm       | enzyme    | 2950                     |
| <b>GSTT2</b>                           | AI266894, Glutathione-s-transferase theta2, GSTT, MGC182032, mGSTT2, Yrs                                                                                                                                                                                                                                                    | glutathione S-transferase theta 2                                  | NP_000845               | <b>1.24</b>  | <b>0.23331</b>   | Cytoplasm       | enzyme    | 2953                     |
| <b>H6PD</b>                            | AI785303, DKFZp686A01246, G6PD1, G6PDH, GDH, Gpd-1, H6pdh, MGC87643                                                                                                                                                                                                                                                         | hexose-6-phosphate dehydrogenase (glucose 1-dehydrogenase)         | NP_004276               | <b>1.10</b>  | <b>0.38314</b>   | Cytoplasm       | enzyme    | 9563                     |
| <b>IDH1</b>                            | AI314845, AI788952, E030024J03Rik, Id-1, IDCD, IDH, IDP, IDPC, ISOCITRATE DEHYDROGENASE, MGC115782, PICD                                                                                                                                                                                                                    | isocitrate dehydrogenase 1 (NADP+), soluble                        | NP_005887               | <b>1.70</b>  | <b>0.0031842</b> | Cytoplasm       | enzyme    | 3417                     |
| <b>IDH2</b>                            | E430004F23, ICD-M, IDH, IDHM, IDP, IDPM, Isocitrate dehydrogenase, ISOCITRATE DEHYDROGENASE 2, mNADP-IDH                                                                                                                                                                                                                    | isocitrate dehydrogenase 2 (NADP+), mitochondrial                  | NP_002159               | <b>1.45</b>  | <b>0.061914</b>  | Cytoplasm       | enzyme    | 3418                     |
| <b>IDH3A</b>                           | 1110003P10Rik, 1500012E04Rik, AA407078, AI316514, Isocitrate/isopropylmalate Dehydrogenase                                                                                                                                                                                                                                  | isocitrate dehydrogenase 3 (NAD+) alpha                            | NP_005521               | <b>1.09</b>  | <b>0.34122</b>   | Cytoplasm       | enzyme    | 3419                     |

|              |                                                                                                                                                                                                                                                                                                      |                                           |           |              |                 |           |           |      |
|--------------|------------------------------------------------------------------------------------------------------------------------------------------------------------------------------------------------------------------------------------------------------------------------------------------------------|-------------------------------------------|-----------|--------------|-----------------|-----------|-----------|------|
| <b>MGST1</b> | 1500002K10Rik, Glutathione s-transferase 1, Gst, GST12, MGC14525, MGC72699, MGST, MGST-I, MICROSOMAL GT                                                                                                                                                                                              | microsomal glutathione S-transferase 1    | NP_064696 | <b>1.68</b>  | <b>0.016618</b> | Cytoplasm | enzyme    | 4257 |
| <b>MGST3</b> | 2010012L10RIK, 2010306B17Rik, 2700004G04RIK, AA516734, GST-III, Loc289197                                                                                                                                                                                                                            | microsomal glutathione S-transferase 3    | NP_004519 | <b>2.02</b>  | <b>0.010773</b> | Cytoplasm | enzyme    | 4259 |
| <b>PGD</b>   | 6PGD, 0610042A05Rik, AU019875, C78335, Cc2-27                                                                                                                                                                                                                                                        | phosphogluconate dehydrogenase            | NP_002622 | <b>1.42</b>  | <b>0.034805</b> | Cytoplasm | enzyme    | 5226 |
| <b>PRDX6</b> | 1 CYS PEROXIREDOXIN, 1-Cys, 1-Cys PRX, 9430088D19RIK, AA690119, AIPLA2, ANTI-OXIDANT PROTEIN2, Antioxidant Enzyme B166, AOP2, Aop2-rs3, Brp-12, CP-3, GPx, KIAA0106, KIAA106, LPLA2, Ltw-4, Lvtw-4, MGC46173, mKIAA0106, NSGP, NSGPx, ORF06, p29, PEROXIREDOXIN 6, Prdx5, PRDX6-RS3, PRX, PRX6, PrxV | peroxiredoxin 6                           | NP_004896 | <b>-1.15</b> | <b>0.21527</b>  | Cytoplasm | enzyme    | 9588 |
| <b>RNPEP</b> | Aminopeptidase B, Ap-B, DKFZp547H084, MGC29229                                                                                                                                                                                                                                                       | arginyl aminopeptidase (aminopeptidase B) | RNPEP     | <b>1.10</b>  | <b>0.36398</b>  | Cytoplasm | peptidase | 6051 |

| PATHWAY: Propanoate metabolism |                                                                                                                                                                                                                                                           |                                                                                                                                       |                         |              |                  |           |        |                          |
|--------------------------------|-----------------------------------------------------------------------------------------------------------------------------------------------------------------------------------------------------------------------------------------------------------|---------------------------------------------------------------------------------------------------------------------------------------|-------------------------|--------------|------------------|-----------|--------|--------------------------|
| Symbol                         | Synonym(s)                                                                                                                                                                                                                                                | Entrez Gene Name                                                                                                                      | HUGO Gene Symbol/RefSeq | Fold Change  | p-value          | Location  | Family | Entrez Gene ID for Human |
| <b>ACAA1</b>                   | 3-oxoacyl-coa Thiolase, ACAA, Acaa1a, Acaa1b, D9Ert25e, MGC7090, MGC108766, Peroxisomal 3-Ketoacyl CoA Thiolase, peroxisomal 3-oxoacyl-Coenzyme A thiolase, Peroxisomal thiolase, Pktaa, Pt, PTHIO, pThiol, PTL, RGD1562373, THIO, THIOLEASE              | acetyl-Coenzyme A acyltransferase 1                                                                                                   | NP_001598               | <b>1.62</b>  | <b>0.023554</b>  | Cytoplasm | enzyme | 30                       |
| <b>ACAD9</b>                   | 2600017P15RIK, 4732402K02, C630012L17RIK, FLJ23533, MGC14452, NP0002, NYGGF2                                                                                                                                                                              | acyl-Coenzyme A dehydrogenase family, member 9                                                                                        | NP_054768               | <b>1.23</b>  | <b>0.21954</b>   | Cytoplasm | enzyme | 28976                    |
| <b>ACADM</b>                   | ACAD1, Acetyl coenzyme a dehydrogenase, medium chain, Acetyl-Coenzyme A Dehydrogenase, Acyl-CoA dehydrogenase, medium chain, AU018656, FLJ18227, FLJ93013, FLJ99884, MCAD, MCADH, MEDIUM-CHAIN FATTY ACYL-COA DEHYDROGENASE                               | acyl-Coenzyme A dehydrogenase, C-4 to C-12 straight chain                                                                             | NP_001120800            | <b>1.33</b>  | <b>0.16878</b>   | Cytoplasm | enzyme | 34                       |
| <b>ACADVL</b>                  | ACAD6, LCACD, MGC93660, VERY LONG-CHAIN FATTY ACYL-COA DEHYDROGENASE, VLACD, VLCAD                                                                                                                                                                        | acyl-Coenzyme A dehydrogenase, very long chain                                                                                        | NP_000009               | <b>-1.04</b> | <b>0.43264</b>   | Cytoplasm | enzyme | 37                       |
| <b>ACAT1</b>                   | 3-Ketothiolase, 6330585C21Rik, AA CoA Thiolase, ACAT, Acetyl-CoA acetyltransferase 1, Acyl-coa acetyltransferase, Acyl-coa acetyltransferase 1, MAT, RATACAL, T2, THIL                                                                                    | acetyl-Coenzyme A acetyltransferase 1                                                                                                 | NP_000010               | <b>1.65</b>  | <b>0.0050079</b> | Cytoplasm | enzyme | 38                       |
| <b>ACAT2</b>                   | Ab2-076, Acat3, Acetoacetyl Coa Thiolase, ACETOENZYME A ACETYLTRANSFERASE 2, ACTL, AW742799, MGC95138, Similar to tcp1x, T2, Tcp-1x, Tcp-x1, Tcp1-rs1                                                                                                     | acetyl-Coenzyme A acetyltransferase 2                                                                                                 | NP_005882               | <b>1.23</b>  | <b>0.19111</b>   | Cytoplasm | enzyme | 39                       |
| <b>ACSL3</b>                   | 2610510B12Rik, ACS3, ACYL-COA SYNTHETASE 3, C85929, FAFL3, LACS3, PRO2194                                                                                                                                                                                 | acyl-CoA synthetase long-chain family member 3                                                                                        | NP_004448               | <b>1.07</b>  | <b>0.42486</b>   | Cytoplasm | enzyme | 2181                     |
| <b>ALDH2</b>                   | Ahd-5, Aldehyde dehydr 2,A2, ALDH-E2, ALDHI, ALDM, Hepatic aldehyde dehydrogenase 2, MGC1806                                                                                                                                                              | aldehyde dehydrogenase 2 family (mitochondrial)                                                                                       | NP_000681               | <b>1.22</b>  | <b>0.20106</b>   | Cytoplasm | enzyme | 217                      |
| <b>ALDH4A1</b>                 | A930035F14Rik, Ahd-1, ALDH4, Aldh5a1, DKFZp779M035, E330022C09, P5CD, P5CDh, P5cdhl, P5cdhs, Ssdh1                                                                                                                                                        | aldehyde dehydrogenase 4 family, member A1                                                                                            | NP_003739               | <b>1.53</b>  | <b>0.080166</b>  | Cytoplasm | enzyme | 8659                     |
| <b>ALDH7A1</b>                 | Aldehyde dehydrogenase family 7 member a1, antiquitin, ATQ1, D18Wsu181e, EPD, FLJ11738, FLJ92814, PDE                                                                                                                                                     | aldehyde dehydrogenase 7 family, member A1                                                                                            | NP_001173               | <b>1.21</b>  | <b>0.21109</b>   | Cytoplasm | enzyme | 501                      |
| <b>ALDH9A1</b>                 | 4-Trimethylaminobutyraldehyde Dehydrogenase 9a, AA139417, Abaldh, ALDH4, ALDH7, ALDH9, E3, ESTM40, TMABA-DH                                                                                                                                               | aldehyde dehydrogenase 9 family, member A1                                                                                            | NP_000687               | <b>1.18</b>  | <b>0.23452</b>   | Cytoplasm | enzyme | 223                      |
| <b>ECH1</b>                    | AA617331, Delta(3,5)-Delta(2,4)-dienoyl-CoA isomerase, mitochondrial, Delta(3,5)-Delta(2,4)-dienoyl-CoA isomerase, peroxisomal, HIP11, HPXEL, MGC107274, Mitochondrial dienoyl-coa isomerase, Perox enolhydratase, Peroxisomal enoyl hydratase-like, Pxel | enoyl Coenzyme A hydratase 1, peroxisomal                                                                                             | NP_001389               | <b>-1.04</b> | <b>0.4027</b>    | Cytoplasm | enzyme | 1891                     |
| <b>ECHS1</b>                   | C80529, Enoyl-CoA hydratase, short-chain, 1, mitochondrial, SCEH                                                                                                                                                                                          | enoyl Coenzyme A hydratase, short chain, 1, mitochondrial                                                                             | NP_004083               | <b>1.34</b>  | <b>0.11116</b>   | Cytoplasm | enzyme | 1892                     |
| <b>HADHA</b>                   | C77020, ECHA, Enoyl-CoA Hydratase, GBP, HADH, LCHAD, MGC1728, MGC105338, Mitochondrial long chain enoyl CoA hydratase, Mitochondrial trifunctional protein alpha, MTPA, RGD1560655, TP-ALPHA                                                              | hydroxyacyl-Coenzyme A dehydrogenase/3-ketoacyl-Coenzyme A thiolase/enoyl-Coenzyme A hydratase (trifunctional protein), alpha subunit | NP_000173               | <b>1.46</b>  | <b>0.025326</b>  | Cytoplasm | enzyme | 3030                     |

|               |                                                                                                                                                                                                                                |                                                                                                                                      |              |              |                 |           |        |       |
|---------------|--------------------------------------------------------------------------------------------------------------------------------------------------------------------------------------------------------------------------------|--------------------------------------------------------------------------------------------------------------------------------------|--------------|--------------|-----------------|-----------|--------|-------|
| <b>HADHB</b>  | 3-ketoacyl-CoA thiolase, 4930479F15Rik, A hydratase (trifunctional protein), beta subunit, ECHB, Gm13910, LOC100048492, MGC87480, Mitochondrial long chain 3-ketoacyl-CoA thiolase, MSTP029, Mtpb, OTTMUSG00000015054, TP-BETA | hydroxyacyl-Coenzyme A dehydrogenase/3-ketoacyl-Coenzyme A thiolase/enoyl-Coenzyme A hydratase (trifunctional protein), beta subunit | NP_000174    | <b>1.50</b>  | <b>0.017067</b> | Cytoplasm | enzyme | 3032  |
| <b>IVD</b>    | 1300016K07Rik, 6720455E18Rik, ACAD2, AI463340, FLJ12715, FLJ34849, Isovaleryl-Coa Dehydrogenase                                                                                                                                | isovaleryl Coenzyme A dehydrogenase                                                                                                  | NP_002216    | <b>1.48</b>  | <b>0.055705</b> | Cytoplasm | enzyme | 3712  |
| <b>LDHA</b>   | GSD11, I lactate dehydrogenase (m chain), I7R2, Lactate dehydrogenase 5, lactate dehydrogenase 1 A chain, Lactate dehydrogenase a, LACTATE DEHYDROGENASE M4, LDH1, LDH5, LDH muscle subunit, LDH-M, M-Ldh, PIG19, RGD1562690   | lactate dehydrogenase A                                                                                                              | NP_005557    | <b>-1.04</b> | <b>0.44731</b>  | Cytoplasm | enzyme | 3939  |
| <b>LDHB</b>   | -lactate dehydrogenase h-chain, AI790582, H-Ldh, L-lactate dehydrogenase B chain, LDH2, LDH heart subunit, LDH-H, TRG-5                                                                                                        | lactate dehydrogenase B                                                                                                              | NP_002291    | <b>1.04</b>  | <b>0.38945</b>  | Cytoplasm | enzyme | 3945  |
| <b>MUT</b>    | D230010K02RIK, MCM, MMCOAMUT, RGD1564912                                                                                                                                                                                       | methylmalonyl Coenzyme A mutase                                                                                                      | NP_000246    | <b>1.21</b>  | <b>0.25761</b>  | Cytoplasm | enzyme | 4594  |
| <b>SUCLA2</b> | 4930547K18RIK, A-BETA, A-SCS, Loc361071, SCS-betaA, Succinyl CoA Synthetase beta, Succinyl-CoA ligase (ADP-forming), -chain, Succinyl-CoA ligase [ADP-forming]                                                                 | succinate-CoA ligase, ADP-forming, beta subunit                                                                                      | NP_003841    | <b>1.40</b>  | <b>0.081598</b> | Cytoplasm | enzyme | 8803  |
| <b>SUCLG1</b> | 1500000I01Rik, FLJ21114, FLJ43513, GALPHA, SCS-ALPHA, Succinate-CoA ligase, Succinyl-CoA Synthetase Alpha, SUCLA1                                                                                                              | succinate-CoA ligase, alpha subunit                                                                                                  | NP_003840    | <b>1.42</b>  | <b>0.082704</b> | Cytoplasm | enzyme | 8802  |
| <b>SUCLG2</b> | AF171077, AW556404, D6Wsu120e, G-BETA, G-SCS, Loc362404, MGC91183, SCS-betaG                                                                                                                                                   | succinate-CoA ligase, GDP-forming, beta subunit UEV and                                                                              | NP_003839    | <b>1.47</b>  | <b>0.057346</b> | Cytoplasm | enzyme | 8801  |
| <b>UEVLD</b>  | 8430408E05RIK, ATTP, FLJ11068, UEV3                                                                                                                                                                                            | lactate/malate dehydrogenase domains                                                                                                 | NP_001035787 | <b>1.04</b>  | <b>0.43062</b>  | Cytoplasm | enzyme | 55293 |

---

## SUPPLEMENTARY TABLE S4

| Group       | Ontology                              | GO-ID    | GO term                                                                               | p-value  | corr p-value | identified molecules | identified cluster size          | available molecules | identified molecules                                                                                                                                                                                                                                                                                                                                                                                                                                                                                                                                                                                                                               |
|-------------|---------------------------------------|----------|---------------------------------------------------------------------------------------|----------|--------------|----------------------|----------------------------------|---------------------|----------------------------------------------------------------------------------------------------------------------------------------------------------------------------------------------------------------------------------------------------------------------------------------------------------------------------------------------------------------------------------------------------------------------------------------------------------------------------------------------------------------------------------------------------------------------------------------------------------------------------------------------------|
| Upregulated | GOBP                                  | 55114    | oxidation reduction                                                                   | 2.39E-13 | 2.46E-10     | 28                   | 134                              | 568                 | NDUFB7 PGD ADH5 HADHA FTH1 FDFT1 GPX1 NDUFS4 IVD HMOX1 IDH1 SPR NDUFS2 AKR1C1 NDUFS1 NSDHL SQRDL PTGR1 NDUFA8 AIFM1 QDPR POR VAT1 NNT AKR1B1 TXNRD1 PCYOX1 RETSAT                                                                                                                                                                                                                                                                                                                                                                                                                                                                                  |
|             |                                       | 44255    | cellular lipid metabolic process                                                      | 2.78E-09 | 1.43E-06     | 23                   | 134                              | 577                 | PTGR1 MVD PSAP HEXA HEXB ADH5 HMGCS1 FDPS PIP5K2C LSS ACAT1 HADHA MIF FDFT1 HADHB APOL2 NPC1 PCYT2 IDI1 AKR1C1 RETSAT NSDHL ACAA1                                                                                                                                                                                                                                                                                                                                                                                                                                                                                                                  |
|             |                                       | 16096    | isoprenoid metabolic process                                                          | 6.44E-09 | 2.21E-06     | 7                    | 134                              | 29                  | MVD ADH5 FDPS HMGCS1 IDI1 RETSAT FDFT1                                                                                                                                                                                                                                                                                                                                                                                                                                                                                                                                                                                                             |
|             |                                       | 42221    | response to chemical stimulus                                                         | 9.88E-09 | 2.54E-06     | 23                   | 134                              | 617                 | DCD TF GCLC S100A7 S100A9 EPHX1 MMP14 VAT1 HADHA MIF GPX1 NPC1 NDUFS4 HSPA2 HMOX1 IDH1 ABCC1 HSPA4 TXNRD1 HSPE1 NDRG1 NDUFS2 AKR1C1                                                                                                                                                                                                                                                                                                                                                                                                                                                                                                                |
|             |                                       | 44248    | cellular catabolic process                                                            | 1.84E-08 | 3.79E-06     | 23                   | 134                              | 638                 | GNPDA1 AIFM1 SUCLG2 HEXA HEXB PGD HK2 QDPR HK1 EPHX1 HADHA HADHB GNS GPX1 CDKN2A NNT ISG15 SQSTM1 HMOX1 ENO2 IDH1 TXNRD1 PCYOX1                                                                                                                                                                                                                                                                                                                                                                                                                                                                                                                    |
|             |                                       | 6695     | cholesterol biosynthetic process                                                      | 2.68E-08 | 4.60E-06     | 6                    | 134                              | 21                  | MVD FDPS HMGCS1 IDI1 NSDHL FDFT1                                                                                                                                                                                                                                                                                                                                                                                                                                                                                                                                                                                                                   |
|             |                                       | 6629     | lipid metabolic process                                                               | 3.58E-08 | 5.26E-06     | 24                   | 134                              | 717                 | PTGR1 MVD PSAP HEXA HEXB ADH5 HMGCS1 FDPS PIP5K2C LSS ACAT1 HADHA MIF FDFT1 HADHB MGST3 APOL2 NPC1 PCYT2 IDI1 AKR1C1 RETSAT NSDHL ACAA1                                                                                                                                                                                                                                                                                                                                                                                                                                                                                                            |
|             |                                       | 6091     | generation of precursor metabolites and energy                                        | 5.39E-08 | 6.93E-06     | 14                   | 134                              | 243                 | GNPDA1 NDUFA8 NDUFB7 SUCLG2 HK2 HK1 LAMP2 NNT NDUFS4 ENO2 IDH1 NDUFS2 NDUFS1 ACAA1                                                                                                                                                                                                                                                                                                                                                                                                                                                                                                                                                                 |
|             |                                       | 9056     | catabolic process                                                                     | 1.18E-07 | 1.35E-05     | 24                   | 134                              | 764                 | PEPD GNPDA1 AIFM1 SUCLG2 HEXA HEXB PGD HK2 QDPR HK1 EPHX1 HADHA HADHB GNS GPX1 CDKN2A NNT ISG15 SQSTM1 HMOX1 ENO2 IDH1 TXNRD1 PCYOX1                                                                                                                                                                                                                                                                                                                                                                                                                                                                                                               |
| 16126       | sterol biosynthetic process           | 2.21E-07 | 2.27E-05                                                                              | 6        | 134          | 29                   | MVD FDPS HMGCS1 IDI1 NSDHL FDFT1 |                     |                                                                                                                                                                                                                                                                                                                                                                                                                                                                                                                                                                                                                                                    |
| Upregulated | GOMF                                  | 16491    | oxidoreductase activity                                                               | 5.42E-15 | 2.27E-12     | 32                   | 133                              | 729                 | NDUFB7 PGD ADH5 HADHA FTH1 HADHB FDFT1 GPX1 NDUFS4 IVD HMOX1 IDH1 SPR NDUFS2 AKR1C1 NDUFS1 NSDHL FTL SQRDL PTGR1 NDUFA8 AIFM1 QDPR POR VAT1 MGST3 NNT AKR1B1 SDCBP TXNRD1 PCYOX1 RETSAT                                                                                                                                                                                                                                                                                                                                                                                                                                                            |
|             |                                       | 3824     | catalytic activity                                                                    | 1.14E-11 | 2.39E-09     | 81                   | 133                              | 5151                | SGSH GNPDA1 QPCTL HEXA PGD HEXB LSS FDFT1 FAHD1 GPX1 NDUFS4 HMOX1 SPR PCYT2 NDUFS2 AKR1C1 NDUFS1 FTL SQRDL PEPD AIFM1 SUCLG2 QDPR PPGB PIP5K2C NPEPPS CDK4 MMP14 VAT1 POR ATP6V1C1 GNS ATP6V1A NNT ASCC3 IGF2R PDE5A PRCP SDCBP TXNRD1 PCYOX1 CTSB PRPS1 ACA1 RAB7A GCLC NDUFB7 MVD HK2 ADH5 NFS1 HMGCS1 HK1 ATP6V1G1 ATP6V1B2 ACAT1 FTH1 HADHA MIF HADHB RRAGC IVD TGM2 ENO2 CAMK2D IDH1 NSDHL PTGR1 NDUFA8 PSAP FDPS EPHX1 TKT MGST3 PPIF ATP6V1E1 AKR1B1 ABCC1 IDI1 MGST1 RETSAT                                                                                                                                                                |
|             |                                       | 16616    | oxidoreductase activity, acting on the CH-OH group of donors, NAD or NADP as acceptor | 1.19E-08 | 1.66E-06     | 10                   | 133                              | 101                 | PTGR1 AKR1B1 PGD ADH5 IDH1 SPR AKR1C1 HADHA NSDHL HADHB                                                                                                                                                                                                                                                                                                                                                                                                                                                                                                                                                                                            |
|             |                                       | 9055     | electron carrier activity                                                             | 2.26E-08 | 2.36E-06     | 14                   | 133                              | 250                 | AIFM1 PGD QDPR ADH5 POR NNT IVD AKR1B1 TXNRD1 NDUFS2 NDUFS1 ETFB RETSAT ETFA                                                                                                                                                                                                                                                                                                                                                                                                                                                                                                                                                                       |
|             |                                       | 16614    | oxidoreductase activity, acting on CH-OH group of donors                              | 3.25E-08 | 2.72E-06     | 10                   | 133                              | 112                 | PTGR1 AKR1B1 PGD ADH5 IDH1 SPR AKR1C1 HADHA NSDHL HADHB                                                                                                                                                                                                                                                                                                                                                                                                                                                                                                                                                                                            |
|             |                                       | 50662    | coenzyme binding                                                                      | 5.84E-08 | 4.07E-06     | 11                   | 133                              | 152                 | GCLC NNT AIFM1 IVD PGD TXNRD1 SPR NDUFS2 HADHA POR ETFA                                                                                                                                                                                                                                                                                                                                                                                                                                                                                                                                                                                            |
|             |                                       | 16651    | oxidoreductase activity, acting on NADH or NADPH                                      | 1.18E-07 | 7.03E-06     | 8                    | 133                              | 70                  | NDUFS4 NNT NDUFA8 NDUFB7 TXNRD1 NDUFS2 NDUFS1 POR                                                                                                                                                                                                                                                                                                                                                                                                                                                                                                                                                                                                  |
|             |                                       | 48037    | cofactor binding                                                                      | 3.04E-07 | 1.59E-05     | 12                   | 133                              | 219                 | GCLC NNT AIFM1 IVD PGD NFS1 TXNRD1 SPR NDUFS2 HADHA POR ETFA                                                                                                                                                                                                                                                                                                                                                                                                                                                                                                                                                                                       |
|             |                                       | 16408    | C-acyltransferase activity                                                            | 2.19E-06 | 9.49E-05     | 4                    | 133                              | 12                  | ACAT1 HADHA HADHB ACAA1                                                                                                                                                                                                                                                                                                                                                                                                                                                                                                                                                                                                                            |
| 3988        | acetyl-CoA C-acyltransferase activity | 2.27E-06 | 9.49E-05                                                                              | 3        | 133          | 4                    | HADHA HADHB ACAA1                |                     |                                                                                                                                                                                                                                                                                                                                                                                                                                                                                                                                                                                                                                                    |
| Upregulated | GOCC                                  | 44444    | cytoplasmic part                                                                      | 1.73E-23 | 3.32E-21     | 87                   | 132                              | 4031                | SGSH S100A7 HEXA HEXB DNAJC10 PDCD4 FDFT1 FAHD1 GPX1 NDUFS4 HMOX1 NDUFS2 NDUFS1 AKR1C1 SQRDL AIFM1 SUCLG2 PPGB MYH4 TMEM126A NPEPPS CDK4 MMP14 RIC8B BCL2L13 VAT1 POR GNS ATP6V1A NPC1 BGN NNT NPC2 IGF2R TXN PRCP SDCBP TXNRD1 PCYOX1 CTSB PRPS1 ACAA1 TF RAB7A GCLC NDUFB7 MVD HK2 NFS1 HMGCS1 HK1 ATP6V1G1 ATP6V1B2 ACAT1 HADHA HADHB CD9 HSPA2 SQSTM1 IVD KRT8 TGM2 ENO2 IDH1 VPS35 HSPE1 SCARB2 LAMB1 ARL6IP5 ETFB NSDHL ETFA NDUFA8 PSAP EPHX1 TKT CD63 MGST3 NCSTN PPIF APOL2 LAMP1 LAMP2 AKR1B1 IDI1 MGST1 RETSAT                                                                                                                          |
|             |                                       | 5737     | cytoplasm                                                                             | 5.76E-22 | 5.53E-20     | 107                  | 132                              | 6541                | GNPDA1 S100A7 FDFT1 FAHD1 CDKN2A ISG15 SPR SUCLG2 QDPR TMEM126A MYH4 NPEPPS RIC8B BCL2L13 POR GNS NPC1 NPC2 NNT ASCC3 PRCP SDCBP ACAA1 PRPS1 RAB7A GCLC MVD HMGCS1 ATP6V1B2 ACAT1 HADHA RRAGC HADHB IVD IDH1 NDRG1 HSPE1 SCARB2 LAMB1 ARL6IP5 PTGR1 FDPS EPHX1 TKT CD63 APOL2 PPIF LAMP1 LAMP2 IDI1 SGSH HEXA HEXB DNAJC10 PDCD4 GPX1 NDUFS4 HMOX1 NDUFS2 AKR1C1 NDUFS1 SQRDL AIFM1 STXB1 PPGB PIP5K2C MMP14 CDK4 VAT1 ATP6V1A BGN IGF2R TXN TXNRD1 CTSB PCYOX1 TF NDUFB7 NFS1 ADH5 HK2 HK1 ATP6V1G1 MIF CD9 HSPA2 SQSTM1 KRT8 COL6A3 COL6A2 ENO2 TGM2 COL6A1 HSPA4 VPS35 ETFB NSDHL ETFA COL4A2 NDUFA8 PSAP ANXA4 MGST3 NCSTN AKR1B1 MGST1 RETSAT |
|             |                                       | 323      | lytic vacuole                                                                         | 3.22E-14 | 1.55E-12     | 18                   | 132                              | 198                 | SGSH RAB7A PSAP HEXA HEXB PPGB ATP6V1G1 CD63 GNS LAMP1 NPC1 LAMP2 NPC2 IGF2R PRCP PCYOX1 CTSB SCARB2                                                                                                                                                                                                                                                                                                                                                                                                                                                                                                                                               |
|             |                                       | 5764     | lysosome                                                                              | 3.22E-14 | 1.55E-12     | 18                   | 132                              | 198                 | SGSH RAB7A PSAP HEXA HEXB PPGB ATP6V1G1 CD63 GNS LAMP1 NPC1 LAMP2 NPC2 IGF2R PRCP PCYOX1 CTSB SCARB2                                                                                                                                                                                                                                                                                                                                                                                                                                                                                                                                               |
|             |                                       | 5773     | vacuole                                                                               | 2.17E-13 | 8.35E-12     | 18                   | 132                              | 221                 | SGSH RAB7A PSAP HEXA HEXB PPGB ATP6V1G1 CD63 GNS LAMP1 NPC1 LAMP2 NPC2 IGF2R PRCP PCYOX1 CTSB SCARB2                                                                                                                                                                                                                                                                                                                                                                                                                                                                                                                                               |

|                      |             |       |                                                                                      |          |          |     |     |       |                                                                                                                                                                                                                                                                                                                                                                                                                                                                                                                                                                                                                                                                                            |
|----------------------|-------------|-------|--------------------------------------------------------------------------------------|----------|----------|-----|-----|-------|--------------------------------------------------------------------------------------------------------------------------------------------------------------------------------------------------------------------------------------------------------------------------------------------------------------------------------------------------------------------------------------------------------------------------------------------------------------------------------------------------------------------------------------------------------------------------------------------------------------------------------------------------------------------------------------------|
|                      |             | 44429 | mitochondrial part                                                                   | 1.01E-11 | 3.22E-10 | 24  | 132 | 542   | SQRDL NDUFA8 NDUFB7 PSAP AIFM1 SUCLG2 HK2 NFS1 HK1 BCL2L13 ACAT1 HADHA HADHB FAHD1 PPIF NNT NDUFS4 IVD HSPE1 NDUFS2 MGST1 ETFB NDUFS1 ETFA                                                                                                                                                                                                                                                                                                                                                                                                                                                                                                                                                 |
|                      |             | 5739  | mitochondrion                                                                        | 3.17E-11 | 8.71E-10 | 30  | 132 | 911   | NDUFB7 NFS1 HK2 HK1 ACAT1 HADHA HADHB FAHD1 GPX1 NDUFS4 HSPA2 IVD TGM2 HSPE1 NDUFS2 ETFB NDUFS1 ETFA SQRDL NDUFA8 PSAP SUCLG2 AIFM1 TMEM126A BCL2L13 PPIF ATP6V1A NNT CTSB MGST1                                                                                                                                                                                                                                                                                                                                                                                                                                                                                                           |
|                      |             | 44424 | intracellular part                                                                   | 5.78E-10 | 1.39E-08 | 114 | 132 | 10110 | GNPDA1 S100A7 FDFT1 FAHD1 CDKN2A ISG15 SPR FTL SUCLG2 QDPR TMEM126A MYH4 BASP1 NPEPPS RIC8B BCL2L13 POR GNS NPC1 NPC2 NNT ASCC3 PRCP SDCBP PRPS1 ACAA1 RAB7A GCLC MVD HMGCS1 ATP6V1B2 ACAT1 HADHA FTH1 RRAGC HADHB IVD IDH1 NDRG1 HSPE1 SCARB2 LAMB1 ARL6IP5 PTGR1 FDPS EPHX1 TKT CD63 PPIF APOL2 LAMP1 LAMP2 ID1 SGSH HEXA HEXB DNAJC10 PDCD4 GPX1 NDUFS4 HMOX1 NDUFS2 AKR1C1 NDUFS1 SQRDL AIFM1 STXB1 PPGB PIP5K2C HMGA2 MMP14 CDK4 VAT1 ATP6V1A BGN IGF2R TXN TXNRD1 CTSB PCYOX1 TF KRT6A NDUFB7 NFS1 ADH5 HK2 HK1 ATP6V1G1 MIF CD9 HSPA2 SQSTM1 KRT8 COL6A3 TGM2 COL6A2 CAMK2D ENO2 COL6A1 VPS35 HSPA4 ETFB NSDHL ETFA COL4A2 NDUFA8 PSAP ANXA4 MGST3 NCSTN AKR1B1 H2AFY2 MGST1 RETSAT |
|                      |             | 31090 | organelle membrane                                                                   | 3.01E-08 | 6.42E-07 | 34  | 132 | 1517  | NDUFB7 HK2 HK1 ATP6V1G1 ACAT1 HADHA HADHB FDFT1 FAHD1 CD9 NDUFS4 SCARB2 ARL6IP5 NDUFS2 NDUFS1 NSDHL SQRDL NDUFA8 PSAP EPHX1 BCL2L13 CD63 POR VAT1 MGST3 APOL2 LAMP1 NPC1 LAMP2 NNT IGF2R SDCBP MGST1 RETSAT                                                                                                                                                                                                                                                                                                                                                                                                                                                                                |
|                      |             | 5622  | intracellular                                                                        | 3.86E-08 | 7.40E-07 | 114 | 132 | 10629 | GNPDA1 S100A7 FDFT1 FAHD1 CDKN2A ISG15 SPR FTL SUCLG2 QDPR TMEM126A MYH4 BASP1 NPEPPS RIC8B BCL2L13 POR GNS NPC1 NPC2 NNT ASCC3 PRCP SDCBP PRPS1 ACAA1 RAB7A GCLC MVD HMGCS1 ATP6V1B2 ACAT1 HADHA FTH1 RRAGC HADHB IVD IDH1 NDRG1 HSPE1 SCARB2 LAMB1 ARL6IP5 PTGR1 FDPS EPHX1 TKT CD63 PPIF APOL2 LAMP1 LAMP2 ID1 SGSH HEXA HEXB DNAJC10 PDCD4 GPX1 NDUFS4 HMOX1 NDUFS2 AKR1C1 NDUFS1 SQRDL AIFM1 STXB1 PPGB PIP5K2C HMGA2 MMP14 CDK4 VAT1 ATP6V1A BGN IGF2R TXN TXNRD1 CTSB PCYOX1 TF KRT6A NDUFB7 NFS1 ADH5 HK2 HK1 ATP6V1G1 MIF CD9 HSPA2 SQSTM1 KRT8 COL6A3 TGM2 COL6A2 CAMK2D ENO2 COL6A1 VPS35 HSPA4 ETFB NSDHL ETFA COL4A2 NDUFA8 PSAP ANXA4 MGST3 NCSTN AKR1B1 H2AFY2 MGST1 RETSAT |
| <b>Downregulated</b> | <b>GOBP</b> | 6374  | nuclear mRNA splicing, via spliceosome                                               | 2.62E-08 | 6.68E-06 | 12  | 144 | 148   | FUSIP1 PABPN1 HNRNPH3 HNRNPA2B1 DNAJC8 SF1 THOC4 HNRNPH1 HNRNPA1 RBMX YBX1 HNRNPA0                                                                                                                                                                                                                                                                                                                                                                                                                                                                                                                                                                                                         |
|                      |             | 375   | RNA splicing, via transesterification reactions                                      | 2.62E-08 | 6.68E-06 | 12  | 144 | 148   | FUSIP1 PABPN1 HNRNPH3 HNRNPA2B1 DNAJC8 SF1 THOC4 HNRNPH1 HNRNPA1 RBMX YBX1 HNRNPA0                                                                                                                                                                                                                                                                                                                                                                                                                                                                                                                                                                                                         |
|                      |             | 377   | RNA splicing, via transesterification reactions with bulged adenosine as nucleophile | 2.62E-08 | 6.68E-06 | 12  | 144 | 148   | FUSIP1 PABPN1 HNRNPH3 HNRNPA2B1 DNAJC8 SF1 THOC4 HNRNPH1 HNRNPA1 RBMX YBX1 HNRNPA0                                                                                                                                                                                                                                                                                                                                                                                                                                                                                                                                                                                                         |
|                      |             | 16071 | mRNA metabolic process                                                               | 2.41E-07 | 3.76E-05 | 16  | 144 | 338   | FUSIP1 RALY PABPN1 KHDRBS1 HNRNPA2B1 SF1 ELAVL1 DDX5 RBMX HNRNPA1 HNRNPA0 YBX1 HNRNPH3 DNAJC8 THOC4 HNRNPH1                                                                                                                                                                                                                                                                                                                                                                                                                                                                                                                                                                                |
|                      |             | 6397  | mRNA processing                                                                      | 2.46E-07 | 3.76E-05 | 15  | 144 | 296   | FUSIP1 RALY PABPN1 KHDRBS1 HNRNPA2B1 SF1 DDX5 RBMX HNRNPA1 HNRNPA0 YBX1 HNRNPH3 DNAJC8 THOC4 HNRNPH1                                                                                                                                                                                                                                                                                                                                                                                                                                                                                                                                                                                       |
|                      |             | 6394  | RNA processing                                                                       | 3.19E-07 | 4.07E-05 | 19  | 144 | 485   | FUSIP1 KHDRBS1 RALY PABPN1 RBM3 AARS HNRNPA2B1 SF1 DDX5 RBMX HNRNPA1 YBX1 HNRNPA0 HNRNPH1 HNRNPH3 DNAJC8 RBMS2 THOC4 HNRNPH1                                                                                                                                                                                                                                                                                                                                                                                                                                                                                                                                                               |
|                      |             | 6395  | RNA splicing                                                                         | 4.79E-07 | 5.24E-05 | 14  | 144 | 270   | FUSIP1 RALY PABPN1 HNRNPA2B1 SF1 DDX5 RBMX HNRNPA1 HNRNPA0 YBX1 HNRNPH3 DNAJC8 THOC4 HNRNPH1                                                                                                                                                                                                                                                                                                                                                                                                                                                                                                                                                                                               |
|                      |             | 22607 | cellular component assembly                                                          | 6.56E-07 | 6.27E-05 | 11  | 144 | 163   | H1F0 TJP1 HMGB2 HIST1H2BN HIST1H1C ITGA6 HIST1H1B H2AFZ MCM2 HIST3H2BB HIST2H3PS2                                                                                                                                                                                                                                                                                                                                                                                                                                                                                                                                                                                                          |
|                      |             | 6334  | nucleosome assembly                                                                  | 8.90E-07 | 7.56E-05 | 9   | 144 | 104   | H1F0 HMGB2 HIST1H2BN HIST1H1C HIST1H1B H2AFZ MCM2 HIST3H2BB HIST2H3PS2                                                                                                                                                                                                                                                                                                                                                                                                                                                                                                                                                                                                                     |
|                      |             | 31497 | chromatin assembly                                                                   | 2.08E-06 | 1.59E-04 | 9   | 144 | 115   | H1F0 HMGB2 HIST1H2BN HIST1H1C HIST1H1B H2AFZ MCM2 HIST3H2BB HIST2H3PS2                                                                                                                                                                                                                                                                                                                                                                                                                                                                                                                                                                                                                     |
| <b>Downregulated</b> | <b>GOMF</b> | 3723  | RNA binding                                                                          | 1.24E-13 | 4.08E-11 | 32  | 155 | 692   | FUSIP1 RALY RPL19 RBM3 RPL27A YBX1 DDX3X RBMS2 RPL10 RPL5 PABPN1 KHDRBS1 HNRNPA2B1 AARS SF1 ELAVL1 RPL23A DDX5 RPS6 RBMX HNRNPA1 HNRNPA0 EIF4G1 HNRNPH1 HNRNPH3 EIF4H CIRBP THOC4 RPS10 SRP72 RBM14 HNRNPH1                                                                                                                                                                                                                                                                                                                                                                                                                                                                                |
|                      |             | 5515  | protein binding                                                                      | 6.02E-09 | 9.93E-07 | 104 | 155 | 7030  | PDLIM7 CTPS PDLIM5 CHMP4A LMO7 RANGAP1 EDIL3 TFG ALK CBX5 DNAJC9 DNAJC8 SERPINE1 PABPN1 HNRNPA2B1 MFG8 CSDA UNC84B RIC8A KRT18 TAGLN COL1A2 RPS10 STMN1 TGFB11 ERC1 CAV2 PPME1 TAGLN2 PEF1 EIF3A RPL5 EMD CDC42EP3 LGALS1 PPF1BP1 RPL23A CSR1 RPS6 DDX5 HNRNPA1 RBMX HNRNPH3 ITGA6 PCNA CIRBP DNAJB1 TMPO DNAJB4 HNRNPH1 DNAJB6 LIMA1 FAM3C IGFBP7 AP3S1 DEK PSPH YBX1 MCM7 P4HA2 SDPR CHST14 RHOC GOLGA2 AP3B1 KHDRBS1 KIAA1949 HIST1H1C CDC2 HIST1H1B ANP32E SLC3A2 SF1 MCM2 NEXN PALLD DAPK3 HNRNPH1 EIF4G1 EPB41L2 CCDC50 PDCL3 PFDN1 SMTN RRM2 THOC4 KPNA2 FUSIP1 SNX18 RAB3A CNN3 CALD1 TPM1 TPM4 AP3M1 PPP1R12A CNN2 CNN1 PAPSS2 FEN1 MLTK NASP ELAVL1 TJP1 RBM14                   |
|                      |             | 8092  | cytoskeletal protein binding                                                         | 2.59E-07 | 2.45E-05 | 18  | 155 | 437   | KIAA1949 LIMA1 CNN3 CALD1 PDLIM5 LMO7 NEXN PALLD TPM1 TPM4 UNC84B EPB41L2 SMTN TAGLN CNN2 CNN1 STMN1 CDC42EP3                                                                                                                                                                                                                                                                                                                                                                                                                                                                                                                                                                              |
|                      |             | 3779  | actin binding                                                                        | 2.97E-07 | 2.45E-05 | 15  | 155 | 305   | KIAA1949 LIMA1 CNN3 PDLIM5 CALD1 LMO7 NEXN PALLD TPM1 TPM4 EPB41L2 SMTN TAGLN CNN2 CNN1                                                                                                                                                                                                                                                                                                                                                                                                                                                                                                                                                                                                    |

|                      |             |       |                                                 |          |          |     |     |                                                                                                                                                                                                                                                                                                                                                                                                                                                                                                                                                                                                                                                                                                                                                                                                                                                                                                                      |                                                                                                                                                                                                                                                                                                                                                                                                                                                                                                                                                                                                                                                                                                                                                                                                                            |
|----------------------|-------------|-------|-------------------------------------------------|----------|----------|-----|-----|----------------------------------------------------------------------------------------------------------------------------------------------------------------------------------------------------------------------------------------------------------------------------------------------------------------------------------------------------------------------------------------------------------------------------------------------------------------------------------------------------------------------------------------------------------------------------------------------------------------------------------------------------------------------------------------------------------------------------------------------------------------------------------------------------------------------------------------------------------------------------------------------------------------------|----------------------------------------------------------------------------------------------------------------------------------------------------------------------------------------------------------------------------------------------------------------------------------------------------------------------------------------------------------------------------------------------------------------------------------------------------------------------------------------------------------------------------------------------------------------------------------------------------------------------------------------------------------------------------------------------------------------------------------------------------------------------------------------------------------------------------|
|                      |             |       |                                                 |          |          |     |     | RALY RPL19 PDLIM7 CTPS PDLIM5 RBM3 CHMP4A PITPNB DTYMK LMO7 RANGAP1 FSTL1 EDIL3 TFG ALK CBX5 HIST1H2BN DNAJC9 SERPINE1 DNAJC8 RBMS2 H2AFZ RPL10 RAB21 PABPN1 H1FO HNRNPA2B1 AARS MFGE8 CSDA UNC84B RIC8A PYCR1 KRT18 TAGLN COL1A2 RPS10 TGFB11 STMN1 SRP72 ERC1 GBP1 CAV2 HMGB2 PPME1 TAGLN2 PEF1 EIF3A DDX3X RPL5 HIST2H3PS2 CDC42EP3 EMD CRIP2 LGALS1 MRC2 PPFIBP1 RPL23A CSR1 DDX5 SUGT1 RPS6 RBMX HNRNPA1 HNRNPA0 HNRNPH3 ITGA6 EIF4H PCNA CIRBP TMPO HSPA13 DNAJB1 HNRNPH1 DNAJB4 DNAJB6 DUT LIMA1 FAM3C IGFBP7 AP3S1 DEK PSPH YBX1 MTHFD2 MCM7 P4HA2 SDPR CHST14 RHOC HIST3H2BB NTSE GOLGA2 AP3B1 KHDRBS1 KIAA1949 HIST1H1C HIST1H1B CDC2 ANP32E SF1 SLC3A2 MCM2 PALLD NEXN DAPK3 ARL3 CCDC50 EPB41L2 EIF4G1 HNRNPH1 PFDN1 PDCL3 SMTN RRM2 THOC4 LEPREL1 KPNA2 FUSIP1 RAB3A SNX18 CNNA3 FAM98A CALD1 RPL27A TPM1 TPM4 AP3M1 PPP1R12A CNN2 CNN1 PAPSS2 FEN1 MLTK NASP ELAVL1 ANXA3 TJP1 PHGDH SUMF2 PSAT1 RBM14 |                                                                                                                                                                                                                                                                                                                                                                                                                                                                                                                                                                                                                                                                                                                                                                                                                            |
|                      |             | 5488  | binding                                         | 6.66E-06 | 4.40E-04 | 141 | 155 | 12313                                                                                                                                                                                                                                                                                                                                                                                                                                                                                                                                                                                                                                                                                                                                                                                                                                                                                                                |                                                                                                                                                                                                                                                                                                                                                                                                                                                                                                                                                                                                                                                                                                                                                                                                                            |
|                      |             | 31072 | heat shock protein binding                      | 2.75E-05 | 1.52E-03 | 6   | 155 | 61                                                                                                                                                                                                                                                                                                                                                                                                                                                                                                                                                                                                                                                                                                                                                                                                                                                                                                                   | NASP DNAJC9 DNAJC8 DNAJB1 DNAJB4 DNAJB6                                                                                                                                                                                                                                                                                                                                                                                                                                                                                                                                                                                                                                                                                                                                                                                    |
|                      |             | 43566 | structure-specific DNA binding                  | 3.64E-05 | 1.72E-03 | 7   | 155 | 94                                                                                                                                                                                                                                                                                                                                                                                                                                                                                                                                                                                                                                                                                                                                                                                                                                                                                                                   | HNRNPH1 HMGB2 HNRNPA2B1 CSDA HNRNPA1 FEN1 YBX1                                                                                                                                                                                                                                                                                                                                                                                                                                                                                                                                                                                                                                                                                                                                                                             |
|                      |             | 3697  | Mol Funct single-stranded DNA binding           | 4.62E-05 | 1.91E-03 | 5   | 155 | 41                                                                                                                                                                                                                                                                                                                                                                                                                                                                                                                                                                                                                                                                                                                                                                                                                                                                                                                   | HNRNPH1 HMGB2 HNRNPA2B1 HNRNPA1 YBX1                                                                                                                                                                                                                                                                                                                                                                                                                                                                                                                                                                                                                                                                                                                                                                                       |
|                      |             | 3690  | double-stranded DNA binding                     | 2.28E-04 | 8.36E-03 | 5   | 155 | 57                                                                                                                                                                                                                                                                                                                                                                                                                                                                                                                                                                                                                                                                                                                                                                                                                                                                                                                   | HNRNPH1 HMGB2 CSDA FEN1 YBX1                                                                                                                                                                                                                                                                                                                                                                                                                                                                                                                                                                                                                                                                                                                                                                                               |
|                      |             | 42805 | actinin binding                                 | 5.58E-04 | 1.84E-02 | 2   | 155 | 4                                                                                                                                                                                                                                                                                                                                                                                                                                                                                                                                                                                                                                                                                                                                                                                                                                                                                                                    | PDLIM5 PALLD                                                                                                                                                                                                                                                                                                                                                                                                                                                                                                                                                                                                                                                                                                                                                                                                               |
| <b>Downregulated</b> | <b>GOCC</b> | 30530 | heterogeneous nuclear ribonucleoprotein complex | 8.29E-13 | 1.73E-10 | 8   | 147 | 17                                                                                                                                                                                                                                                                                                                                                                                                                                                                                                                                                                                                                                                                                                                                                                                                                                                                                                                   | HNRNPH1 RALY HNRNPH3 HNRNPA2B1 HNRNPH1 HNRNPA1 RBMX HNRNPA0                                                                                                                                                                                                                                                                                                                                                                                                                                                                                                                                                                                                                                                                                                                                                                |
|                      |             | 44424 | intracellular part                              | 2.11E-10 | 1.39E-08 | 126 | 147 | 10114                                                                                                                                                                                                                                                                                                                                                                                                                                                                                                                                                                                                                                                                                                                                                                                                                                                                                                                | RALY RPL19 PDLIM7 CTPS PDLIM5 CHMP4A PITPNB DTYMK LMO7 RANGAP1 LUZP1 CBX5 HIST1H2BN RBMS2 H2AFZ RPL10 RAB21 HMGCL RPL36A PABPN1 PLD3 INA H1FO AARS HNRNPA2B1 CSDA UNC84B RIC8A PYCR1 KRT18 TAGLN COL1A2 RPS10 TGFB11 STMN1 SRP72 ERC1 FILIP1L CAV2 CDV3 HMGB2 PEF1 EIF3A KDELC2 DDX3X RPL5 HIST2H3PS2 EMD CDC42EP3 UAP1 LGALS1 RPL23A CSR1 DDX5 SUGT1 RPS6 RBMX HNRNPA1 HNRNPA0 HNRNPH3 EIF4H PCNA CIRBP GOSR2 TMPO HSPA13 DNAJB1 HNRNPH1 DNAJB6 DUT LIMA1 AP3S1 DEK SAH1 YBX1 MTHFD2 MCM7 P4HA2 SDPR CHST14 HIST3H2BB GOLGA2 AP3B1 KHDRBS1 KIAA1949 HIST1H1C CDC2 HIST1H1B ANP32E SLC3A2 SF1 MCM2 NEXN PALLD DAPK3 CCDC50 EPB41L2 HNRNPH1 EIF4G1 PFDN1 PDCL3 SMTN RRM2 CTSD THOC4 LEPREL1 KPNA2 FUSIP1 RAB3A CALD1 RPL27A ASNS TPM1 TPM4 AP3M1 PPP1R12A CNN2 FEN1 NES MLTK NASP ELAVL1 ANXA3 GOLPH3 SUMF2 RBM14           |
|                      |             | 43228 | non-membrane-bounded organelle                  | 2.66E-10 | 1.39E-08 | 46  | 147 | 1929                                                                                                                                                                                                                                                                                                                                                                                                                                                                                                                                                                                                                                                                                                                                                                                                                                                                                                                 | LIMA1 HMGB2 RPL19 PDLIM7 CALD1 PDLIM5 RPL27A TPM1 TPM4 CBX5 EIF3A MCM7 HIST1H2BN H2AFZ RPL10 CNN2 RPL5 HIST3H2BB HIST2H3PS2 CDC42EP3 RPL36A H1FO INA KIAA1949 NES HIST1H1C HIST1H1B CDC2 SF1 RPL23A MCM2 PALLD NEXN SUGT1 RPS6 UNC84B EPB41L2 SMTN KRT18 PCNA RPS10 TMPO SRP72 STMN1 TGFB11 FILIP1L                                                                                                                                                                                                                                                                                                                                                                                                                                                                                                                        |
|                      |             | 43232 | intracellular non-membrane-bounded organelle    | 2.66E-10 | 1.39E-08 | 46  | 147 | 1929                                                                                                                                                                                                                                                                                                                                                                                                                                                                                                                                                                                                                                                                                                                                                                                                                                                                                                                 | LIMA1 HMGB2 RPL19 PDLIM7 CALD1 PDLIM5 RPL27A TPM1 TPM4 CBX5 EIF3A MCM7 HIST1H2BN H2AFZ RPL10 CNN2 RPL5 HIST3H2BB HIST2H3PS2 CDC42EP3 RPL36A H1FO INA KIAA1949 NES HIST1H1C HIST1H1B CDC2 SF1 RPL23A MCM2 PALLD NEXN SUGT1 RPS6 UNC84B EPB41L2 SMTN KRT18 PCNA RPS10 TMPO SRP72 STMN1 TGFB11 FILIP1L                                                                                                                                                                                                                                                                                                                                                                                                                                                                                                                        |
|                      |             | 5622  | intracellular                                   | 1.71E-09 | 7.16E-08 | 128 | 147 | 10633                                                                                                                                                                                                                                                                                                                                                                                                                                                                                                                                                                                                                                                                                                                                                                                                                                                                                                                | RALY RPL19 PDLIM7 CTPS PDLIM5 CHMP4A PITPNB DTYMK LMO7 RANGAP1 LUZP1 CBX5 HIST1H2BN RBMS2 H2AFZ RPL10 RAB21 HMGCL RPL36A PABPN1 PLD3 INA H1FO AARS HNRNPA2B1 CSDA UNC84B RIC8A PYCR1 KRT18 TAGLN COL1A2 RPS10 TGFB11 STMN1 SRP72 ERC1 FILIP1L CAV2 CDV3 HMGB2 PEF1 EIF3A KDELC2 DDX3X RPL5 HIST2H3PS2 EMD CDC42EP3 UAP1 LGALS1 RPL23A CSR1 DDX5 SUGT1 RPS6 RBMX HNRNPA1 HNRNPA0 HNRNPH3 EIF4H PCNA CIRBP GOSR2 TMPO HSPA13 DNAJB1 HNRNPH1 DNAJB6 DUT LIMA1 AP3S1 DEK SAH1 YBX1 MTHFD2 MCM7 P4HA2 SDPR CHST14 RHOC HIST3H2BB GOLGA2 AP3B1 KHDRBS1 KIAA1949 HIST1H1C CDC2 HIST1H1B ANP32E SLC3A2 SF1 MCM2 NEXN PALLD DAPK3 ARL3 CCDC50 EPB41L2 EIF4G1 HNRNPH1 PFDN1 PDCL3 SMTN RRM2 CTSD THOC4 LEPREL1 KPNA2 FUSIP1 RAB3A CALD1 RPL27A ASNS TPM1 TPM4 AP3M1 PPP1R12A CNN2 FEN1 NES MLTK NASP ELAVL1 ANXA3 GOLPH3 SUMF2 RBM14 |
|                      |             | 30529 | ribonucleoprotein complex                       | 1.51E-08 | 5.27E-07 | 22  | 147 | 588                                                                                                                                                                                                                                                                                                                                                                                                                                                                                                                                                                                                                                                                                                                                                                                                                                                                                                                  | RALY RPL19 HNRNPA2B1 RPL27A SF1 RPL23A DDX5 RPS6 HNRNPA1 RBMX HNRNPA0 HNRNPH1 HNRNPH3 EIF3A RPL10 THOC4 RPS10 RPL5 SRP72 RBM14 HNRNPH1 RPL36A                                                                                                                                                                                                                                                                                                                                                                                                                                                                                                                                                                                                                                                                              |
|                      |             | 44446 | intracellular organelle part                    | 2.06E-08 | 6.01E-07 | 64  | 147 | 3725                                                                                                                                                                                                                                                                                                                                                                                                                                                                                                                                                                                                                                                                                                                                                                                                                                                                                                                 | RALY LIMA1 RPL19 CHMP4A AP3S1 RANGAP1 CBX5 HIST1H2BN MCM7 P4HA2 H2AFZ CHST14 HIST3H2BB RAB21 HMGCL PABPN1 PLD3 INA H1FO HIST1H1C HIST1H1B CDC2 HNRNPA2B1 SF1 MCM2 PALLD UNC84B EPB41L2 HNRNPH1 KRT18 THOC4 RPS10 TGFB11 STMN1 SRP72 ERC1 KPNA2 FILIP1L FUSIP1 CAV2 HMGB2 RPL27A TPM1 TPM4 KDELC2 DDX3X RPL5 HIST2H3PS2 EMD NES RPL23A DDX5 SUGT1 RPS6 RBMX HNRNPA1 HNRNPA0 HNRNPH3 PCNA SUMF2 GOSR2 TMPO RBM14 HNRNPH1                                                                                                                                                                                                                                                                                                                                                                                                     |

|       |                        |          |          |    |     |      |                                                                                                                                                                                                                                                                                                                                                                                                                                                                                                                                                                                  |
|-------|------------------------|----------|----------|----|-----|------|----------------------------------------------------------------------------------------------------------------------------------------------------------------------------------------------------------------------------------------------------------------------------------------------------------------------------------------------------------------------------------------------------------------------------------------------------------------------------------------------------------------------------------------------------------------------------------|
| 44422 | organelle part         | 2.30E-08 | 6.01E-07 | 64 | 147 | 3735 | RALY LIMA1 RPL19 CHMP4A AP3S1 RANGAP1 CBX5 HIST1H2BN MCM7 P4HA2 H2AFZ CHST14 HIST3H2BB RAB21 HMGCL PABPN1 PLD3 INA H1F0 HIST1H1C HIST1H1B CDC2 HNRNPA2B1 SF1 MCM2 PALLD UNC84B EPB41L2 HNRPDL KRT18 THOC4 RPS10 TGFB111 STMN1 SRP72 ERC1 KPNA2 FILIP1L FUSIP1 CAV2 HMGB2 RPL27A TPM1 TPM4 KDEL2 DDX3X RPL5 HIST2H3PS2 EMD NES RPL23A DDX5 SUGT1 RPS6 RBMX HNRNPA1 HNRNPA0 HNRNPH3 PCNA SUMF2 GOSR2 TMPO RBM14 HNRNPH1                                                                                                                                                            |
| 32991 | macromolecular complex | 6.83E-08 | 1.59E-06 | 47 | 147 | 2375 | RALY RPL19 RPL27A AP3S1 LMO7 RANGAP1 TPM4 CBX5 EIF3A MCM7 HIST1H2BN AP3M1 H2AFZ RPL10 RPL5 HIST3H2BB HIST2H3PS2 AP3B1 RPL36AL H1F0 HIST1H1C HIST1H1B HNRNPA2B1 SF1 RPL23A MCM2 DDX5 SUGT1 RPS6 RBMX HNRNPA1 HNRNPA0 EIF4G1 HNRPDL PFDN1 HNRNPH3 ITGA6 EIF4H PCNA THOC4 RPS10 SRP72 RBM14 HNRNPH1 ERC1 KPNA2 FILIP1L                                                                                                                                                                                                                                                              |
| 5737  | cytoplasm              | 8.13E-08 | 1.70E-06 | 91 | 147 | 6546 | LIMA1 RPL19 PDLIM7 CTPS CHMP4A PDLIM5 DTYMK PITPNB AP3S1 LMO7 RANGAP1 YBX1 ASAH1 MTHFD2 P4HA2 SDPR CHST14 RPL10 RAB21 HMGCL AP3B1 GOLGA2 RPL36AL PLD3 PABPN1 KIAA1949 CDC2 ANP32E AARS SF1 SLC3A2 PALLD NEXN CSDA DAPK3 UNC84B RIC8A CCDC50 EPB41L2 EIF4G1 HNRPDL PYCR1 PFDN1 PDCL3 SMTN KRT18 TAGLN RRM2 COL1A2 CTSD THOC4 RPS10 LEPREL1 SRP72 STMN1 TGFB111 ERC1 KPNA2 FUSIP1 RAB3A CAV2 HMGB2 CDV3 RPL27A ASNS TPM1 TPM4 PEF1 EIF3A KDEL2 DDX3X AP3M1 PPP1R12A RPL5 CD42EP3 UAP1 MLTK NASP LGALS1 RPL23A RPS6 HNRNPA1 ANXA3 GOLPH3 EIF4H SUMF2 GOSR2 HSPA13 DNAJB1 DNAJB6 DUT |

**SUPPLEMENTARY TABLE S5**

| Group       | Ontology | GO-ID | GO term                                        | p-value  | corr p-value | identified molecules | identified cluster size | cluster frequency (%) | available molecules | identified molecules                                                                                                                                                                                                                                                                                                                                                                                                                                                                                                                                                                                                                                                                        |
|-------------|----------|-------|------------------------------------------------|----------|--------------|----------------------|-------------------------|-----------------------|---------------------|---------------------------------------------------------------------------------------------------------------------------------------------------------------------------------------------------------------------------------------------------------------------------------------------------------------------------------------------------------------------------------------------------------------------------------------------------------------------------------------------------------------------------------------------------------------------------------------------------------------------------------------------------------------------------------------------|
| Upregulated | GOSlim   | 5737  | cytoplasm                                      | 1.07E-22 | 1.10E-20     | 107                  | 141                     | 75.9                  | 6541                | GNPDA1 S100A7 FDFT1 FAHD1 CDKN2A ISG15 SPR SUCLG2 QDPR TMEM126A MYH4 NPEPPS RIC8B BCL2L13 POR GNS NPC1 NPC2 NNT ASCC3 PRCP SDCBP ACAA1 PRPS1 RAB7A GCLC MVD HMGCS1 ATP6V1B2 ACAT1 HADHA RRAGC HADHB IVD IDH1 NDRG1 HSPE1 SCARB2 LAMB1 ARL6IP5 PTGR1 FDPS EPHX1 TKT CD63 APOL2 PPIF LAMP1 LAMP2 IDI1 SGSH HEXA HEXB DNAJC10 PDCD4 GPX1 NDUFS4 HMOX1 NDUFS2 AKR1C1 NDUFS1 SQRD AIFM1 STXBP1 PPGB PIP5K2C MMP14 CDK4 VAT1 ATP6V1A BGN IGF2R TXN TXNRD1 CTSB PCYOX1 TF NDUFB7 NFS1 ADH5 HK2 HK1 ATP6V1G1 MIF CD9 HSPA2 SQSTM1 KRT8 COL6A3 COL6A2 ENO2 TGM2 COL6A1 HSPA4 VPS35 ETFB NSDHL ETFA COL4A2 NDUFA8 PSAP ANXA4 MGST3 NCSTN AKR1B1 MGST1 RETSAT                                          |
|             |          | 5764  | lysosome                                       | 1.29E-14 | 6.62E-13     | 18                   | 141                     | 12.8                  | 198                 | SGSH RAB7A PSAP HEXA HEXB PPGB ATP6V1G1 CD63 GNS LAMP1 NPC1 LAMP2 NPC2 IGF2R PRCP PCYOX1 CTSB SCARB2                                                                                                                                                                                                                                                                                                                                                                                                                                                                                                                                                                                        |
|             |          | 5773  | vacuole                                        | 8.74E-14 | 3.00E-12     | 18                   | 141                     | 12.8                  | 221                 | SGSH RAB7A PSAP HEXA HEXB PPGB ATP6V1G1 CD63 GNS LAMP1 NPC1 LAMP2 NPC2 IGF2R PRCP PCYOX1 CTSB SCARB2                                                                                                                                                                                                                                                                                                                                                                                                                                                                                                                                                                                        |
|             |          | 3824  | catalytic activity                             | 1.80E-13 | 4.63E-12     | 81                   | 141                     | 57.4                  | 5151                | SGSH GNPDA1 QPCTL HEXA PGD HEXB LSS FDFT1 FAHD1 GPX1 NDUFS4 HMOX1 SPR PCYT2 NDUFS2 AKR1C1 NDUFS1 FTL SQRD PEPD AIFM1 SUCLG2 QDPR PPGB PIP5K2C NPEPPS CDK4 MMP14 VAT1 POR ATP6V1C1 GNS ATP6V1A NNT ASCC3 IGF2R PDE5A PRCP SDCBP TXNRD1 PCYOX1 CTSB PRPS1 ACAA1 RAB7A GCLC NDUFB7 MVD HK2 ADH5 NFS1 HMGCS1 HK1 ATP6V1G1 ATP6V1B2 ACAT1 FTH1 HADHA MIF HADHB RRAGC IVD TGM2 ENO2 CAMK2D IDH1 NSDHL PTGR1 NDUFA8 PSAP FDPS EPHX1 TKT MGST3 PPIF ATP6V1E1 AKR1B1 ABCC1 IDI1 MGST1 RETSAT                                                                                                                                                                                                         |
|             |          | 5739  | mitochondrion                                  | 8.79E-12 | 1.81E-10     | 30                   | 141                     | 21.3                  | 911                 | NDUFB7 NFS1 HK2 HK1 ACAT1 HADHA HADHB FAHD1 GPX1 NDUFS4 HSPA2 IVD TGM2 HSPE1 NDUFS2 ETFB NDUFS1 ETFA SQRD NDUFA8 PSAP SUCLG2 AIFM1 TMEM126A BCL2L13 PPIF ATP6V1A NNT CTSB MGST1                                                                                                                                                                                                                                                                                                                                                                                                                                                                                                             |
|             |          | 6629  | lipid metabolic process                        | 1.04E-09 | 1.78E-08     | 24                   | 141                     | 17.0                  | 717                 | PTGR1 MVD PSAP HEXA HEXB ADH5 HMGCS1 FDPS PIP5K2C LSS ACAT1 HADHA MIF FDFT1 HADHB MGST3 APOL2 NPC1 PCYT2 IDI1 AKR1C1 RETSAT NSDHL ACAA1                                                                                                                                                                                                                                                                                                                                                                                                                                                                                                                                                     |
|             |          | 9056  | catabolic process                              | 3.63E-09 | 5.35E-08     | 24                   | 141                     | 17.0                  | 764                 | PEPD GNPDA1 AIFM1 SUCLG2 HEXA HEXB PGD HK2 QDPR HK1 EPHX1 HADHA HADHB GNS GPX1 CDKN2A NNT ISG15 SQSTM1 HMOX1 ENO2 IDH1 TXNRD1 PCYOX1                                                                                                                                                                                                                                                                                                                                                                                                                                                                                                                                                        |
|             |          | 5622  | intracellular                                  | 4.19E-09 | 5.39E-08     | 114                  | 141                     | 80.9                  | 10629               | GNPDA1 S100A7 FDFT1 FAHD1 CDKN2A ISG15 SPR FTL SUCLG2 QDPR TMEM126A MYH4 BASP1 NPEPPS RIC8B BCL2L13 POR GNS NPC1 NPC2 NNT ASCC3 PRCP SDCBP PRPS1 ACAA1 RAB7A GCLC MVD HMGCS1 ATP6V1B2 ACAT1 HADHA FTH1 RRAGC HADHB IVD IDH1 NDRG1 HSPE1 SCARB2 LAMB1 ARL6IP5 PTGR1 FDPS EPHX1 TKT CD63 PPIF APOL2 LAMP1 LAMP2 IDI1 SGSH HEXA HEXB DNAJC10 PDCD4 GPX1 NDUFS4 HMOX1 NDUFS2 AKR1C1 NDUFS1 SQRD AIFM1 STXBP1 PPGB PIP5K2C HMG2A MMP14 CDK4 VAT1 ATP6V1A BGN IGF2R TXN TXNRD1 CTSB PCYOX1 TF KRT6A NDUFB7 NFS1 ADH5 HK2 HK1 ATP6V1G1 MIF CD9 HSPA2 SQSTM1 KRT8 COL6A3 TGM2 COL6A2 CAMK2D ENO2 COL6A1 VPS35 HSPA4 ETFB NSDHL ETFA COL4A2 NDUFA8 PSAP ANXA4 MGST3 NCSTN AKR1B1 H2AFY2 MGST1 RETSAT |
|             |          | 6091  | generation of precursor metabolites and energy | 5.42E-09 | 6.20E-08     | 14                   | 141                     | 9.9                   | 243                 | GNPDA1 NDUFA8 NDUFB7 SUCLG2 HK2 HK1 LAMP2 NNT NDUFS4 ENO2 IDH1 NDUFS2 NDUFS1 ACAA1                                                                                                                                                                                                                                                                                                                                                                                                                                                                                                                                                                                                          |
|             |          | 9055  | electron carrier activity                      | 7.79E-09 | 8.02E-08     | 14                   | 141                     | 9.9                   | 250                 | AIFM1 PGD QDPR ADH5 POR NNT IVD AKR1B1 TXNRD1 NDUFS2 NDUFS1 ETFB RETSAT ETFA TF SNX9 RAB7A SLC38A2 NDUFB7 SNX5 PGD HK2 HK1 ATP6V1G1 ATP6V1B2 FTH1 NDUFS4 SQSTM1 COL6A3 COL6A2 COL6A1 VPS35 FYCO1 ARL6IP5 NDUFS2 ETFB AKR1C1 NDUFS1 ETFA FTL COL4A2 NDUFA8 PSAP STXBP1 MYH4 PPGB VAT1 APOL2 ATP6V1C1 ATP6V1A NPC1 NNT NPC2 ATP6V1E1 IGF2R TXN SDCBP ABCC1 TXNRD1                                                                                                                                                                                                                                                                                                                             |
|             |          | 6810  | transport                                      | 2.34E-08 | 2.19E-07     | 45                   | 141                     | 31.9                  | 2534                | GCLC MVD S100A7 HK2 NFS1 HMGCS1 HK1 TKT NPEPPS CDK4 RIC8B PDCD4 GPX1 SQSTM1 HMOX1 AKR1B1 TXN ENO2 IDH1 VPS35 TXNRD1 IDI1 AKR1C1 PRPS1                                                                                                                                                                                                                                                                                                                                                                                                                                                                                                                                                       |
|             |          | 5829  | cytosol                                        | 4.40E-08 | 3.77E-07     | 24                   | 141                     | 17.0                  | 870                 |                                                                                                                                                                                                                                                                                                                                                                                                                                                                                                                                                                                                                                                                                             |



|       |                                      |          |          |     |     |      |       |                                                                                                                                                                                                                                                                                                                                                                                                                                                                                                                                                                                                                                                                                                                                                                                                                    |
|-------|--------------------------------------|----------|----------|-----|-----|------|-------|--------------------------------------------------------------------------------------------------------------------------------------------------------------------------------------------------------------------------------------------------------------------------------------------------------------------------------------------------------------------------------------------------------------------------------------------------------------------------------------------------------------------------------------------------------------------------------------------------------------------------------------------------------------------------------------------------------------------------------------------------------------------------------------------------------------------|
| 8150  | biological_process                   | 5.21E-08 | 4.13E-07 | 134 | 141 | 95.0 | 14511 | GNPDA1 QPCTL CADM1 S100A8 S100A7 PGD S100A9 FDFT1 FAHD1 CDKN2A ISG15 TGFB1 SPR FTL SUCLG2 QDPR MYH4 NPEPPS RIC8B BCL2L13 POR GNS NPC1 NPC2 NNT HSPB6 ASCC3 PDE5A PRCP SDCBP PRPS1 ACAA1 SNX9 RAB7A SLC38A2 GCLC MVD SNX5 HMGCS1 ATP6V1B2 ACAT1 HADHA FTH1 RRAGC HADHB IVD IDH1 NDRG1 HSPE1 SCARB2 LAMB1 ARL6IP5 PTGR1 CD276 FDPS EPHX1 TKT CD63 PIPF APOL2 LAMP2 IDI1 SGSH HEXA HEXB DNAJC10 LSS PD CD4 GPX1 NDUFS4 HMOX1 PCYT2 NDUFS2 AKR1C1 NDUFS1 SQRDL PEPD AIFM1 STXBP1 PPGB PIP5K2C HMGA2 MMP14 CDK4 VAT1 ATP6V1C1 ATP6V1A BGN IGF2R TXN TXNRD1 CTSB PCYOX1 TF DCD KRT6A NDUFB7 HK2 ADH5 NFS1 HK1 ATP6V1G1 DCN MIF CD9 HSPA2 SQSTM1 COL6A3 KRT8 TGM2 ENO2 CAMK2D COL6A2 COL6A1 VPS35 HSPA4 CALML5 FYCO1 ETFB NSDHL ETFA COL4A2 NDUFA8 PSAP HSPG2 ANXA4 MGST3 NCSTN ATP6V1E1 AKR1B1 H2AFY2 ABCC1 MGST1 RETSAT |
| 8152  | metabolic process                    | 1.39E-07 | 1.03E-06 | 85  | 141 | 60.3 | 7111  | SGSH GNPDA1 QPCTL HEXA PGD HEXB DNAJC10 LS5 FDFT1 FAHD1 GPX1 CDKN2A NDUFS4 ISG15 HMOX1 SPR PCYT2 NDUFS2 NDUFS1 AKR1C1 SQRDL PEPD AIFM1 SUCLG2 QDPR PPGB PIP5K2C NPEPPS CDK4 MMP14 HMGA2 VAT1 POR GNS ATP6V1A NPC1 NNT ASCC3 PDE5A PRCP SDCBP TXNRD1 PCYOX1 CTSB PRPS1 ACAA1 DCD GCLC NDUFB7 MVD HK2 ADH5 NFS1 HMGCS1 HK1 ATP6V1B2 ACAT1 FTH1 HADHA MIF HADHB RRAGC SQSTM1 IVD TGM2 ENO2 CAMK2D IDH1 HSPE1 NSDHL PTGR1 NDUFA8 PSAP FDPS EPHX1 TKT MGST3 NCSTN PIPF APOL2 LAMP2 AKR1B1 IDI1 MGST1 RETSAT                                                                                                                                                                                                                                                                                                             |
| 19725 | cellular homeostasis                 | 5.35E-07 | 3.67E-06 | 13  | 141 | 9.2  | 300   | TF AIFM1 HEXA HEXB DNAJC10 HK2 FTH1 CD9 TXN TGM2 TXNRD1 NDUFS1 FTL                                                                                                                                                                                                                                                                                                                                                                                                                                                                                                                                                                                                                                                                                                                                                 |
| 5578  | proteinaceous extracellular matrix   | 2.16E-06 | 1.39E-05 | 12  | 141 | 8.5  | 287   | COL4A2 BGN PSAP COL6A3 TGFB1 HSPG2 COL6A2 COL6A1 DCN MMP14 LAMB1 GPC1                                                                                                                                                                                                                                                                                                                                                                                                                                                                                                                                                                                                                                                                                                                                              |
| 5515  | protein binding                      | 1.18E-05 | 7.14E-05 | 79  | 141 | 56.0 | 7030  | SGSH S100A8 CADM1 QPCTL S100A7 MARCKSL1 HEXA S100A9 PGD HEXB DNAJC10 PDCD4 FDFT1 FAHD1 GPX1 CDKN2A ISG15 HMOX1 TGFB1 SPR NDUFS1 FTL AIFM1 MYH4 PPGB PIP5K2C NPEPPS CDK4 RIC8B HMGA2 MMP14 ATP6V1C1 NPC1 BGN NPC2 HSPB6 IGF2R TXN SDCBP CTSB DCD SNX9 RAB7A KRT6A GCLC SNX5 HK2 NFS1 HK1 ATP6V1G1 DCN ACAT1 FTH1 MIF RRAGC CD9 HSPA2 SQSTM1 COL6A3 KRT8 TGM2 CAMK2D COL6A2 COL6A1 VPS35 HSPE1 NDRG1 CALML5 SCARB2 LAMB1 ARL6IP5 PSAP HSPG2 CD276 TKT NCSTN APOL2 ATP6V1E1 AKR1B1                                                                                                                                                                                                                                                                                                                                    |
| 16023 | cytoplasmic membrane-bounded vesicle | 2.08E-05 | 1.19E-04 | 12  | 141 | 8.5  | 359   | NCSTN CD9 TF RAB7A LAMP2 BGN IGF2R SDCBP CTSB ATP6V1B2 MMP14 VAT1                                                                                                                                                                                                                                                                                                                                                                                                                                                                                                                                                                                                                                                                                                                                                  |
| 6950  | response to stress                   | 2.82E-05 | 1.53E-04 | 24  | 141 | 17.0 | 1257  | DCD TF GCLC S100A8 S100A7 AIFM1 S100A9 MMP14 MIF APOL2 CD9 GPX1 HSPA2 HSPB6 SQSTM1 HMOX1 AKR1B1 IDH1 HSPA4 TXNRD1 SPR HSPE1 CTSB NDUFS2                                                                                                                                                                                                                                                                                                                                                                                                                                                                                                                                                                                                                                                                            |
| 22904 | respiratory electron transport chain | 6.25E-05 | 3.09E-04 | 5   | 141 | 3.5  | 55    | NDUFS4 NDUFA8 NDUFB7 NDUFS2 NDUFS1                                                                                                                                                                                                                                                                                                                                                                                                                                                                                                                                                                                                                                                                                                                                                                                 |
| 5488  | binding                              | 6.58E-05 | 3.09E-04 | 115 | 141 | 81.6 | 12304 | QPCTL CADM1 S100A8 S100A7 PGD S100A9 FDFT1 FAHD1 CDKN2A ISG15 TGFB1 SPR FTL SUCLG2 QDPR MYH4 NPEPPS RIC8B POR GNS NPC1 NPC2 NNT HSPB6 ASCC3 PDE5A SDCBP PRPS1 SNX9 RAB7A SLC38A2 GCLC MVD SNX5 ATP6V1B2 ACAT1 HADHA FTH1 RRAGC IVD IDH1 NDRG1 HSPE1 SCARB2 LAMB1 ARL6IP5 PTGR1 HPCAL1 CD276 TKT PIPF APOL2 IDI1 SGSH MARCKSL1 HEXA HEXB DNAJC10 PDCD4 GPX1 HMOX1 NDUFS2 AKR1C1 NDUFS1 PEPD AIFM1 PPGB PIP5K2C HMGA2 MMP14 CDK4 VAT1 ATP6V1C1 ATP6V1A BGN IGF2R TXN TXNRD1 CTSB PCYOX1 TF DCD KRT6A NFS1 ADH5 HK2 HK1 DCN ATP6V1G1 MIF CD9 HSPA2 SQSTM1 KRT8 COL6A3 TGM2 ENO2 COL6A2 CAMK2D COL6A1 VPS35 HSPA4 CALML5 FYCO1 NSDHL ETFA COL4A2 PSAP HSPG2 ANXA4 NCSTN ATP6V1E1 AKR1B1 H2AFY2 ABCC1                                                                                                                   |
| 5768  | endosome                             | 6.60E-05 | 3.09E-04 | 9   | 141 | 6.4  | 228   | TF LAMP1 RAB7A LAMP2 NPC1 SQSTM1 IGF2R VPS35 CD63                                                                                                                                                                                                                                                                                                                                                                                                                                                                                                                                                                                                                                                                                                                                                                  |
| 6811  | ion transport                        | 1.16E-04 | 5.21E-04 | 17  | 141 | 12.1 | 791   | TF COL4A2 SLC38A2 PSAP HK2 HK1 ATP6V1B2 ATP6V1G1 FTH1 ATP6V1C1 ATP6V1A NNT ATP6V1E1 COL6A3 COL6A2 COL6A1 FTL                                                                                                                                                                                                                                                                                                                                                                                                                                                                                                                                                                                                                                                                                                       |
| 5975  | carbohydrate metabolic process       | 1.63E-04 | 6.98E-04 | 12  | 141 | 8.5  | 445   | SGSH GNS LAMP2 GNPDA1 HEXA AKR1B1 HEXB PGD ENO2 HK2 HK1 IDH1                                                                                                                                                                                                                                                                                                                                                                                                                                                                                                                                                                                                                                                                                                                                                       |
| 5783  | endoplasmic reticulum                | 2.12E-04 | 8.74E-04 | 17  | 141 | 12.1 | 832   | S100A7 DNAJC10 EPHX1 PPGB ACAT1 POR FDFT1 MGST3 NCSTN APOL2 NPC1 HMOX1 SDCBP ARL6IP5 MGST1 RETSAT NSDHL                                                                                                                                                                                                                                                                                                                                                                                                                                                                                                                                                                                                                                                                                                            |
| 16265 | death                                | 3.50E-04 | 1.34E-03 | 12  | 141 | 8.5  | 484   | GPX1 CDKN2A CADM1 PSAP SQSTM1 AIFM1 HMOX1 HSPE1 BCL2L13 PDCD4 NDUFS1 RRAGC                                                                                                                                                                                                                                                                                                                                                                                                                                                                                                                                                                                                                                                                                                                                         |
| 8219  | cell death                           | 3.50E-04 | 1.34E-03 | 12  | 141 | 8.5  | 484   | GPX1 CDKN2A CADM1 PSAP SQSTM1 AIFM1 HMOX1 HSPE1 BCL2L13 PDCD4 NDUFS1 RRAGC                                                                                                                                                                                                                                                                                                                                                                                                                                                                                                                                                                                                                                                                                                                                         |
| 19748 | secondary metabolic process          | 4.92E-04 | 1.81E-03 | 4   | 141 | 2.8  | 48    | HMOX1 ADH5 IDI1 RETSAT                                                                                                                                                                                                                                                                                                                                                                                                                                                                                                                                                                                                                                                                                                                                                                                             |

|       |                                                |          |          |     |     |      |       |                                                                                                                                                                                                                                                                                                                                                                                                                                                                                                                                                                                                                                                                                                                                                                                                                |
|-------|------------------------------------------------|----------|----------|-----|-----|------|-------|----------------------------------------------------------------------------------------------------------------------------------------------------------------------------------------------------------------------------------------------------------------------------------------------------------------------------------------------------------------------------------------------------------------------------------------------------------------------------------------------------------------------------------------------------------------------------------------------------------------------------------------------------------------------------------------------------------------------------------------------------------------------------------------------------------------|
| 43226 | organelle                                      | 9.44E-04 | 3.35E-03 | 83  | 141 | 58.9 | 8385  | SGSH S100A7 HEXA HEXB DNAJC10 PDCD4 FDFT1 FAHD1 GPX1 CDKN2A NDUFS4 HMOX1 NDUFS2 NDUFS1 SQRDL SUCLG2 AIFM1 PPGB MYH4 TMEM126A BASP1 NPEPPS CDK4 MMP14 HMGA2 BCL2L13 VAT1 POR GNS ATP6V1A NPC1 BGN NNT NPC2 IGF2R PRCP SDCBP TXNRD1 PCYOX1 CTSB ACAA1 TF RAB7A KRT6A NDUFB7 HK2 NFS1 HK1 ATP6V1G1 ATP6V1B2 ACAT1 HADHA RRAGC HADHB CD9 HSPA2 SQSTM1 IVD KRT8 TGM2 IDH1 VPS35 HSPE1 NDRG1 SCARB2 ARL6IP5 ETFB NSDHL ETFA NDUFA8 PSAP EPHX1 CD63 MGST3 NCSTN PIPF APOL2 LAMP1 LAMP2 H2AFY2 IDI1 MGST1 RETSAT                                                                                                                                                                                                                                                                                                       |
| 44238 | primary metabolic process                      | 1.53E-03 | 5.27E-03 | 66  | 141 | 46.8 | 6344  | SGSH GNPDA1 QPCTL HEXA PGD HEXB DNAJC10 LS5 FDFT1 CDKN2A NDUFS4 ISG15 PCYT2 AKR1C1 NDUFS1 PEPD AIFM1 QDPR PPGB PIP5K2C NPEPPS HMGA2 MMP14 CDK4 GNS ATP6V1A NPC1 ASCC3 PDE5A PRCP PCYOX1 CTSB PRPS1 ACAA1 GCLC MVD HK2 ADH5 NFS1 HMGCS1 HK1 ATP6V1B2 ACAT1 HADHA MIF RRAGC HADHB SQSTM1 TGM2 ENO2 CAMK2D IDH1 HSPE1 NSDHL PTGR1 PSAP FDPS TKT MGST3 NCSTN PIPF APOL2 LAMP2 AKR1B1 IDI1 RETSAT                                                                                                                                                                                                                                                                                                                                                                                                                   |
| 50876 | reproduction                                   | 1.79E-03 | 5.93E-03 | 11  | 141 | 7.8  | 506   | APOL2 CD9 GNPDA1 HSPA2 CADM1 HEXA HEXB HK2 HK1 MMP14 MIF                                                                                                                                                                                                                                                                                                                                                                                                                                                                                                                                                                                                                                                                                                                                                       |
| 3674  | molecular_function                             | 1.91E-03 | 6.15E-03 | 133 | 141 | 94.3 | 15912 | GNPDA1 QPCTL CADM1 S100A8 S100A7 PGD S100A9 FDFT1 FAHD1 CDKN2A ISG15 TGFB1 SPR FTL SUCLG2 QDPR MYH4 NPEPPS RIC8B BCL2L13 POR GNS NPC1 NPC2 NNT HSPB6 ASCC3 PDE5A PRCP SDCBP PRPS1 ACAA1 SNX9 RAB7A SLC38A2 GCLC MVD SNX5 HMGCS1 ATP6V1B2 ACAT1 HADHA FTH1 RRAGC HADHB IVD IDH1 NDRG1 HSPE1 SCARB2 LAMB1 ARL6IP5 PTGR1 HPCAL1 CD276 FDPS EPHX1 TKT PIPF APOL2 IDI1 SGSH MARCKSL1 HEXA HEXB DNAJC10 LSS PDCD4 GPX1 NDUFS4 HMOX1 PCYT2 NDUFS2 AKR1C1 NDUFS1 SQRDL PEPD AIFM1 PPGB PIP5K2C HMGA2 MMP14 CDK4 VAT1 ATP6V1C1 ATP6V1A BGN IGF2R TXN TXNRD1 CTSB PCYOX1 TF DCD KRT6A NDUFB7 HK2 ADH5 NFS1 HK1 ATP6V1G1 DCN MIF CD9 HSPA2 SQSTM1 COL6A3 KRT8 TGM2 ENO2 CAMK2D COL6A2 COL6A1 VPS35 HSPA4 CALML5 FYCO1 ETFB NSDHL ETFA COL4A2 NDUFA8 PSAP HSPG2 ANXA4 MGST3 NCSTN ATP6V1E1 AKR1B1 H2AFY2 ABC1 MGST1 RETSAT |
| 16787 | hydrolase activity                             | 1.99E-03 | 6.21E-03 | 29  | 141 | 20.6 | 2180  | SGSH RAB7A GNPDA1 QPCTL HEXA HEXB HK2 HK1 ATP6V1G1 ATP6V1B2 RRAGC FAHD1 HMOX1 PEPD PSAP EPHX1 PPGB NPEPPS MMP14 GNS ATP6V1C1 ATP6V1A ASCC3 ATP6V1E1 PDE5A PRCP ABCC1 CTSB IDI1                                                                                                                                                                                                                                                                                                                                                                                                                                                                                                                                                                                                                                 |
| 16043 | cellular component organization and biogenesis | 4.56E-03 | 1.38E-02 | 23  | 141 | 16.3 | 1687  | RAB7A COL4A2 PSAP AIFM1 HEXA S100A9 HEXB HK2 HK1 MYH4 HMGA2 MIF CD9 GPX1 NPC1 CDKN2A NDUFS4 IGF2R H2AFY2 KRT8 COL6A2 SDCBP LAMB1                                                                                                                                                                                                                                                                                                                                                                                                                                                                                                                                                                                                                                                                               |
| 16740 | transferase activity                           | 4.70E-03 | 1.38E-02 | 23  | 141 | 16.3 | 1691  | QPCTL MVD HK2 NFS1 HMGCS1 FDPS HK1 PIP5K2C TKT CDK4 ACAT1 POR HADHA FDFT1 HADHB MGST3 IGF2R TGM2 CAMK2D PCYT2 MGST1 ACAA1 PRPS1                                                                                                                                                                                                                                                                                                                                                                                                                                                                                                                                                                                                                                                                                |
| 9607  | response to biotic stimulus                    | 5.40E-03 | 1.55E-02 | 7   | 141 | 5.0  | 276   | DCD HSPA2 ISG15 S100A7 KRT8 HSPA4 HSPE1                                                                                                                                                                                                                                                                                                                                                                                                                                                                                                                                                                                                                                                                                                                                                                        |
| 5623  | cell                                           | 6.49E-03 | 1.81E-02 | 125 | 141 | 88.7 | 14823 | GNPDA1 QPCTL CADM1 S100A7 FDFT1 FAHD1 CDKN2A ISG15 SPR FTL SUCLG2 QDPR MYH4 TMEM126A BASP1 NPEPPS RIC8B BCL2L13 POR GNS NPC1 NPC2 NNT ASCC3 PRCP SDCBP PRPS1 ACAA1 RAB7A SLC38A2 GCLC MVD HMGCS1 ATP6V1B2 ACAT1 HADHA FTH1 RRAGC HADHB IVD IDH1 NDRG1 HSPE1 FAHM162A SCARB2 LAMB1 ARL6IP5 PTGR1 CD276 FDPS EPHX1 TKT CD63 PIPF APOL2 LAMP1 LAMP2 IDI1 SGSH MARCKSL1 HEXA HEXB DNAJC10 PDCD4 GPX1 NDUFS4 HMOX1 GPC1 NDUFS2 AKR1C1 NDUFS1 SQRDL AIFM1 STXBP1 PPGB PIP5K2C HMGA2 MMP14 CDK4 VAT1 ATP6V1C1 ATP6V1A BGN IGF2R TXN TXNRD1 CTSB PCYOX1 TF KRT6A NDUFB7 NFS1 ADH5 HK2 HK1 ATP6V1G1 MIF CD9 HSPA2 SQSTM1 COL6A3 KRT8 TGM2 ENO2 CAMK2D COL6A2 COL6A1 VPS35 HSPA4 FYCO1 ETFB NSDHL ETFA COL4A2 NDUFA8 PSAP ANXA4 MGST3 NCSTN ATP6V1E1 AKR1B1 H2AFY2 ABCC1 MGST1 RETSAT                                    |
| 16209 | antioxidant activity                           | 6.98E-03 | 1.89E-02 | 3   | 141 | 2.1  | 51    | MGST3 GPX1 TXNRD1                                                                                                                                                                                                                                                                                                                                                                                                                                                                                                                                                                                                                                                                                                                                                                                              |
| 8283  | cell proliferation                             | 7.15E-03 | 1.89E-02 | 7   | 141 | 5.0  | 291   | HMOX1 TXN TGFB1 CD276 TXNRD1 MMP14 MIF                                                                                                                                                                                                                                                                                                                                                                                                                                                                                                                                                                                                                                                                                                                                                                         |
| 31386 | protein tag                                    | 7.65E-03 | 1.97E-02 | 1   | 141 | 0.7  | 1     | ISG15                                                                                                                                                                                                                                                                                                                                                                                                                                                                                                                                                                                                                                                                                                                                                                                                          |
| 8289  | Mol Funct lipid binding                        | 8.96E-03 | 2.25E-02 | 8   | 141 | 5.7  | 380   | APOL2 SNX9 NPC2 PSAP SNX5 ADH5 ANXA4 HADHA                                                                                                                                                                                                                                                                                                                                                                                                                                                                                                                                                                                                                                                                                                                                                                     |
| 5576  | extracellular region                           | 1.03E-02 | 2.52E-02 | 24  | 141 | 17.0 | 1912  | DCD TF COL4A2 PSAP S100A7 PGD HSPG2 DNAJC10 DCN MMP14 MIF APOL2 NPC2 BGN ISG15 HMOX1 AKR1B1 COL6A3 TGFB1 COL6A2 COL6A1 CTSB LAMB1 GPC1                                                                                                                                                                                                                                                                                                                                                                                                                                                                                                                                                                                                                                                                         |
| 43234 | protein complex                                | 1.08E-02 | 2.58E-02 | 22  | 141 | 15.6 | 1711  | GCLC NDUFA8 NDUFB7 HK2 HK1 MYH4 ATP6V1G1 ATP6V1B2 CDK4 FTH1 HADHA ATP6V1C1 ATP6V1A NDUFS4 ATP6V1E1 ENO2 CAMK2D SDCBP LAMB1 NDUFS2 NDUFS1 FTL                                                                                                                                                                                                                                                                                                                                                                                                                                                                                                                                                                                                                                                                   |
| 166   | nucleotide binding                             | 1.17E-02 | 2.73E-02 | 26  | 141 | 18.4 | 2146  | RAB7A GCLC MVD HK2 HK1 RRAGC HSPA2 IVD CAMK2D TGM2 HSPE1 HSPA4 ETFA AIFM1 SUCLG2 MYH4 TKT PIP5K2C CDK4 POR ATP6V1C1 ATP6V1A ASCC3 PDE5A ABCC1 TXNRD1                                                                                                                                                                                                                                                                                                                                                                                                                                                                                                                                                                                                                                                           |
| 5509  | calcium ion binding                            | 1.23E-02 | 2.81E-02 | 14  | 141 | 9.9  | 933   | SGSH HPCAL1 S100A8 S100A7 PSAP S100A9 TKT MMP14 ANXA4 MIF FAHD1 GNS TGM2 CALML5                                                                                                                                                                                                                                                                                                                                                                                                                                                                                                                                                                                                                                                                                                                                |

|      |                                       |          |          |    |     |      |      |                                                                                         |
|------|---------------------------------------|----------|----------|----|-----|------|------|-----------------------------------------------------------------------------------------|
| 6996 | organelle organization and biogenesis | 1.54E-02 | 3.45E-02 | 16 | 141 | 11.3 | 1155 | PSAP AIFM1 HEXA S100A9 HEXB HK2 MYH4 HK1 HMG2A MIF GPX1 CDKN2A NDUFS4 H2AFY2 KRT8 SDCBP |
| 9605 | response to external stimulus         | 1.97E-02 | 4.32E-02 | 10 | 141 | 7.1  | 614  | APOL2 CD9 TF S100A8 HMOX1 S100A9 SPR CTSB MP14 MIF                                      |

| Group         | Ontology                     | GO-ID    | GO term         | p-value  | corr p-value | identified molecules | identified cluster size | cluster frequency (%)                                                                                         | available molecules | identified molecules                                                                                                                                                                                                                                                                                                                                                                                                                                                                                                                                                                                                                                                                                                                                                                                                                                                                                              |
|---------------|------------------------------|----------|-----------------|----------|--------------|----------------------|-------------------------|---------------------------------------------------------------------------------------------------------------|---------------------|-------------------------------------------------------------------------------------------------------------------------------------------------------------------------------------------------------------------------------------------------------------------------------------------------------------------------------------------------------------------------------------------------------------------------------------------------------------------------------------------------------------------------------------------------------------------------------------------------------------------------------------------------------------------------------------------------------------------------------------------------------------------------------------------------------------------------------------------------------------------------------------------------------------------|
| Downregulated | GOSlim                       | 3723     | RNA binding     | 5.92E-15 | 6.10E-13     | 32                   | 160                     | 20.0                                                                                                          | 692                 | FUSIP1 RALY RPL19 RBM3 RPL27A YBX1 DDX3X RBMS2 RPL10 RPL5 PABPN1 KHDRBS1 HNRNPA2B1 AARS SF1 ELAVL1 RPL23A DDX5 RPS6 RBMX HNRNPA1 HNRNPA0 EIF4G1 HNRPDL HNRNPH3 EIF4H CIRBP THOC4 RPS10 SRP72 RBM14 HNRNPH1                                                                                                                                                                                                                                                                                                                                                                                                                                                                                                                                                                                                                                                                                                        |
|               |                              | 5515     | protein binding | 4.53E-12 | 2.33E-10     | 104                  | 160                     | 65.0                                                                                                          | 7030                | PDLIM7 CTPS PDLIM5 CHMP4A LMO7 RANGAP1 EDIL3 TFG/ALK CBX5 DNAJC9 DNAJC8 SERPINE1 PABPN1 HNRNPA2B1 MFGES8 CSDA UNC84B RIC8A KRT18 TAGLN COL1A2 RPS10 STMN1 TGFB11 ERC1 CAV2 PPME1 TAGLN2 PEF1 EIF3A RPL5 EMD CDC42EP3 LGALS1 PPFIBP1 RPL23A CSR1 RPS6 DDX5 HNRNPA1 RBMX HNRNPH3 ITGA6 PCNA CIRBP DNAJB1 TMPO DNAJB4 HNRNPH1 DNAJB6 LIMA1 FAM3C IGFBP7 AP3S1 DEK PSPH YBX1 MCM7 P4HA2 SDPR CHST14 RHOC GOLGA2 AP3B1 KHDRBS1 KIAA1949 HIST1H1C CDC2 HIST1H1B ANP32E SLC3A2 SF1 MCM2 NEXN PALLD DAPK3 HNRPDL EIF4G1 EPB41L2 CCDC50 PDC3 PFND1 SMTN RRM2 THOC4 KPNA2 FUSIP1 SNX18 RAB3A CNN3 CALD1 TPM1 TPM4 AP3M1 PPP1R12A CNN2 CNN1 PAPSS2 FEN1 MLTK NASP ELAVL1 TJP1 RBM14                                                                                                                                                                                                                                          |
|               |                              | 5488     | binding         | 3.61E-10 | 1.24E-08     | 141                  | 160                     | 88.1                                                                                                          | 12313               | RALY RPL19 PDLIM7 CTPS PDLIM5 RBM3 CHMP4A PITPNB DTYMK LMO7 RANGAP1 FSTL1 EDIL3 TFG/ALK CBX5 HIST1H2BN DNAJC9 SERPINE1 DNAJC8 RBMS2 H2AFZ RPL10 RAB21 PABPN1 H1F0 HNRNPA2B1 AARS MFGES8 CSDA UNC84B RIC8A PYCR1 KRT18 TAGLN COL1A2 RPS10 TGFB11 STMN1 SRP72 ERC1 GBP1 CAV2 HMGB2 PPME1 TAGLN2 PEF1 EIF3A DDX3X RPL5 HIST2H3PS2 CDC42EP3 EMD CRIP2 LGALS1 MR2 PPFIBP1 RPL23A CSR1 DDX5 SUGT1 RPS6 RBMX HNRNPA1 HNRNPA0 HNRNPH3 ITGA6 EIF4H PCNA CIRBP TMPO HSPA13 DNAJB1 HNRNPH1 DNAJB4 DNAJB6 DUT LIMA1 FAM3C IGFBP7 AP3S1 DEK PSPH YBX1 MTHFD2 MCM7 P4HA2 SDPR CHST14 RHOC HIST3H2BB NT5E GOLGA2 AP3B1 KHDRBS1 KIAA1949 HIST1H1C HIST1H1B CDC2 ANP32E SF1 SLC3A2 MCM2 PALLD NEXN DAPK3 ARL3 CCDC50 EPB41L2 EIF4G1 HNRPDL PFND1 PDC3 SMTN RRM2 THOC4 LEPREL1 KPNA2 FUSIP1 RAB3A SNX18 CNN3 FAM98A CALD1 RPL27A TPM1 TPM4 AP3M1 PPP1R12A CNN2 CNN1 PAPSS2 FEN1 MLTK NASP ELAVL1 ANXA3 TJP1 PHGDH SUMF2 PSAT1 RBM14 |
|               |                              | 5622     | intracellular   | 1.70E-09 | 4.37E-08     | 128                  | 160                     | 80.0                                                                                                          | 10633               | RALY RPL19 PDLIM7 CTPS PDLIM5 CHMP4A PITPNB DTYMK LMO7 RANGAP1 LUZP1 CBX5 HIST1H2BN RBMS2 H2AFZ RPL10 RAB21 HMGCL RPL36AL PABPN1 PLD3 INA H1F0 AARS HNRNPA2B1 CSDA UNC84B RIC8A PYCR1 KRT18 TAGLN COL1A2 RPS10 TGFB11 STMN1 SRP72 ERC1 FILIP1L CAV2 CDV3 HMGB2 PEF1 EIF3A KDEL2 DDX3X RPL5 HIST2H3PS2 EMD CDC42EP3 UAP1 LGALS1 RPL23A CSR1 DDX5 SUGT1 RPS6 RBMX HNRNPA1 HNRNPA0 HNRNPH3 EIF4H PCNA CIRBP GOSR2 TMPO HSPA13 DNAJB1 HNRNPH1 DNAJB6 DUT LIMA1 AP3S1 DEK ASA1 YBX1 MTHFD2 MCM7 P4HA2 SDPR CHST14 RHOC HIST3H2BB GOLGA2 AP3B1 KHDRBS1 KIAA1949 HIST1H1C CDC2 HIST1H1B ANP32E SLC3A2 SF1 MCM2 NEXN PALLD DAPK3 ARL3 CCDC50 EPB41L2 EIF4G1 HNRPDL PFND1 PDC3 SMTN RRM2 CTSD THOC4 LEPREL1 KPNA2 FUSIP1 RAB3A CALD1 RPL27A ASNS TPM1 TPM4 AP3M1 PPP1R12A CNN2 FEN1 NES MLTK NASP ELAVL1 ANXA3 GOLPH3 SUMF2 RBM14                                                                                          |
|               |                              | 5737     | cytoplasm       | 2.54E-08 | 5.23E-07     | 91                   | 160                     | 56.9                                                                                                          | 6546                | LIMA1 RPL19 PDLIM7 CTPS CHMP4A PDLIM5 DTYMK PITPNB AP3S1 LMO7 RANGAP1 YBX1 ASA1 MTHFD2 P4HA2 SDPR CHST14 RPL10 RAB21 HMGCL AP3B1 GOLGA2 RPL36AL PLD3 PABPN1 KIAA1949 CDC2 ANP32E AARS SF1 SLC3A2 PALLD NEXN CSDA DAPK3 UNC84B RIC8A CCDC50 EPB41L2 EIF4G1 HNRPDL PYCR1 PFND1 PDC3 SMTN KRT18 TAGLN RRM2 COL1A2 CTSD THOC4 RPS10 LEPREL1 SRP72 STMN1 TGFB11 ERC1 KPNA2 FUSIP1 RAB3A CAV2 HMGB2 CDV3 RPL27A ASNS TPM1 TPM4 PEF1 EIF3A KDEL2 DDX3X AP3M1 PPP1R12A RPL5 CDC42EP3 UAP1 MLTK NASP LGALS1 RPL23A RPS6 HNRNPA1 ANXA3 GOLPH3 EIF4H SUMF2 GOSR2 HSPA13 DNAJB1 DNAJB6 DUT                                                                                                                                                                                                                                                                                                                                    |
| 8092          | cytoskeletal protein binding | 4.89E-08 | 8.39E-07        | 18       | 160          | 11.3                 | 437                     | KIAA1949 LIMA1 CNN3 CALD1 PDLIM5 LMO7 NEXN PALLD TPM1 TPM4 UNC84B EPB41L2 SMTN TAGLN CNN2 CNN1 STMN1 CDC42EP3 |                     |                                                                                                                                                                                                                                                                                                                                                                                                                                                                                                                                                                                                                                                                                                                                                                                                                                                                                                                   |
| 3779          | actin binding                | 6.99E-08 | 1.03E-06        | 15       | 160          | 9.4                  | 305                     | KIAA1949 LIMA1 CNN3 PDLIM5 CALD1 LMO7 NEXN PALLD TPM1 TPM4 EPB41L2 SMTN TAGLN CNN2 CNN1                       |                     |                                                                                                                                                                                                                                                                                                                                                                                                                                                                                                                                                                                                                                                                                                                                                                                                                                                                                                                   |

|       |                                                |          |          |     |     |      |       |                                                                                                                                                                                                                                                                                                                                                                                                                                                                                                                                                                                                                                                                                                                                                                                                                                                                                                                                                                                                     |
|-------|------------------------------------------------|----------|----------|-----|-----|------|-------|-----------------------------------------------------------------------------------------------------------------------------------------------------------------------------------------------------------------------------------------------------------------------------------------------------------------------------------------------------------------------------------------------------------------------------------------------------------------------------------------------------------------------------------------------------------------------------------------------------------------------------------------------------------------------------------------------------------------------------------------------------------------------------------------------------------------------------------------------------------------------------------------------------------------------------------------------------------------------------------------------------|
| 43226 | organelle                                      | 8.72E-08 | 1.12E-06 | 106 | 160 | 66.3 | 8389  | RALY RPL19 PDLIM7 PDLIM5 CHMP4A PITPNB LMO7 RANGAP1 LUZP1 CBX5 HIST1H2BN H2AFZ RBMS2 RPL10 RAB21 HMGCL RPL36AL PABPN1 PLD3 INA H1F0 HNRNPA2B1 CSDA UNC84B PYCR1 KRT18 RPS10 TGFB11 STMN1 SRP72 ERC1 FILIP1L CAV2 HMGB2 EIF3A KDEL2 DDX3X RPL5 HIST2H3PS2 EMD CDC42EP3 RPL23A CSR1 RPS6 SUGT1 DDX5 HNRNPA1 RBMX HNRNPA0 HNRNPH3 PCNA CIRBP GOSR2 TMPO HSPA13 DNAJB1 HNRNPH1 DNAJB6 DUT LIMA1 AP3S1 DEK ASAH1 YBX1 MTHFD2 MCM7 P4HA2 CHST14 HIST3H2BB GOLGA2 AP3B1 KHDRBS1 KIAA1949 HIST1H1C CDC2 HIST1H1B ANP32E SLC3A2 SF1 MCM2 NEXN PALLD DAPK3 HNRNPA1 EPB41L2 SMTN CTSD THOC4 LEPREL1 KPNA2 FUSIP1 RAB3A CALD1 RPL27A TPM1 TPM4 AP3M1 CNN2 FEN1 NES MLTK NASP ELAVL1 GOLPH3 SUMF2 RBM14                                                                                                                                                                                                                                                                                                          |
| 16043 | cellular component organization and biogenesis | 8.99E-07 | 1.03E-05 | 35  | 160 | 21.9 | 1688  | FUSIP1 CAV2 HMGB2 LIMA1 CNN3 PDLIM7 LMO7 CBX5 EIF3A HIST1H2BN H2AFZ CNN2 CNN1 HIST2H3PS2 HIST3H2BB AP3B1 H1F0 INA HIST1H1C HIST1H1B NASP MRC2 SF1 MCM2 PALLD DAPK3 UNC84B EPB41L2 TJP1 ITGA6 GOSR2 STMN1 RBM14 KPNA2 DNAJB6                                                                                                                                                                                                                                                                                                                                                                                                                                                                                                                                                                                                                                                                                                                                                                         |
| 5694  | chromosome                                     | 1.24E-06 | 1.28E-05 | 15  | 160 | 9.4  | 382   | H1F0 HMGB2 HIST1H1C HIST1H1B MCM2 SUGT1 UNC84B CBX5 HIST1H2BN MCM7 H2AFZ PCNA TMPO HIST2H3PS2 HIST3H2BB                                                                                                                                                                                                                                                                                                                                                                                                                                                                                                                                                                                                                                                                                                                                                                                                                                                                                             |
| 6996  | organelle organization and biogenesis          | 2.23E-06 | 2.08E-05 | 27  | 160 | 16.9 | 1155  | CAV2 HMGB2 LIMA1 CNN3 LMO7 CBX5 EIF3A HIST1H2BN H2AFZ CNN2 CNN1 HIST2H3PS2 HIST3H2BB H1F0 INA HIST1H1C HIST1H1B NASP MCM2 PALLD DAPK3 UNC84B EPB41L2 STMN1 RBM14 KPNA2 DNAJB6                                                                                                                                                                                                                                                                                                                                                                                                                                                                                                                                                                                                                                                                                                                                                                                                                       |
| 3674  | molecular_function                             | 6.05E-06 | 5.20E-05 | 155 | 160 | 96.9 | 15925 | RALY RPL19 PDLIM7 CTPS PDLIM5 RBM3 CHMP4A PITPNB DTYMK LMO7 RANGAP1 FSTL1 EDIL3 TFG/ALK CBX5 HIST1H2BN DNAJC9 SERPINE1 DNAJC8 RBMS2 H2AFZ RPL10 RAB21 HMGCL RPL36AL H1F0 INA PLD3 PABPN1 HNRNPA2B1 AARS MFGE8 CSDA UNC84B RIC8A PYCR1 KRT18 TAGLN COL1A2 RPS10 TGFB11 STMN1 SRP72 ERC1 FILIP1L GBP1 CAV2 CDV3 HMGB2 PPME1 TAGLN2 PEF1 EIF3A DDX3X RPL5 HIST2H3PS2 CDC42EP3 EMD UAP1 CRIP2 LGALS1 MRC2 PPFIBP1 RPL23A CSR1 DDX5 SUGT1 RPS6 RBMX HNRNPA1 HNRNPA0 HNRNPH3 ITGA6 EIF4H PCNA CIRBP GOSR2 TMPO HSPA13 DNAJB1 HNRNPH1 DNAJB4 DNAJB6 DUT LIMA1 FAM3C IGFBP7 AP3S1 DEK PSPH ASAH1 YBX1 MTHFD2 MCM7 P4HA2 SDPR CHST14 RHOC HIST3H2BB NT5E AP3B1 GOLGA2 KHDRBS1 KIAA1949 HIST1H1C HIST1H1B CDC2 ANP32E SF1 SLC3A2 MCM2 PALLD NEXN DAPK3 ARL3 CCDC50 EPB41L2 EIF4G1 HNRNPA1 PFDN1 PDCL3 SMTN RRM2 CTSD THOC4 LEPREL1 FKBP11 KPNA2 FUSIP1 RAB3A SNX18 CNN3 FAM98A CALD1 RPL27A ASNS TPM1 TPM4 ATXN2L AP3M1 PPP1R12A CNN2 CNN1 PAPS2 FEN1 NES MLTK NASP ELAVL1 ANXA3 TJP1 PHGDH SUMF2 PSAT1 RBM14 |
| 5829  | cytosol                                        | 2.08E-05 | 1.65E-04 | 21  | 160 | 13.1 | 869   | CAV2 RPL19 CDC2 CTPS PDLIM5 DTYMK RPL27A ASNS RPL23A RPS6 EIF4G1 PFDN1 EIF3A RRM2 SDPR EIF4H RPL10 RPS10 RPL5 ERC1 DUT                                                                                                                                                                                                                                                                                                                                                                                                                                                                                                                                                                                                                                                                                                                                                                                                                                                                              |
| 3676  | nucleic acid binding                           | 3.96E-05 | 2.91E-04 | 50  | 160 | 31.3 | 3345  | RALY RPL19 RBM3 DEK YBX1 HIST1H2BN RBMS2 H2AFZ RPL10 HIST3H2BB PABPN1 H1F0 KHDRBS1 HIST1H1C CDC2 HIST1H1B AARS HNRNPA2B1 SF1 MCM2 CSDA HNRNPA1 EIF4G1 PFDN1 RPS10 THOC4 SRP72 FUSIP1 HMGB2 RPL27A EIF3A DDX3X RPL5 HIST2H3PS2 FEN1 ELAVL1 RPL23A RPS6 DDX5 HNRNPA1 RBMX HNRNPA0 HNRNPH3 EIF4H PCNA CIRBP TMPO RBM14 HNRNPH1 DNAJB6                                                                                                                                                                                                                                                                                                                                                                                                                                                                                                                                                                                                                                                                  |
| 166   | nucleotide binding                             | 6.98E-05 | 4.79E-04 | 36  | 160 | 22.5 | 2146  | FUSIP1 RALY RAB3A RBM3 DTYMK TFG/ALK MCM7 DDX3X RBMS2 RHOC PAPSS2 NT5E RAB21 PABPN1 MLTK CDC2 HNRNPA2B1 AARS ELAVL1 RPL23A MCM2 DDX5 DAPK3 RBMX HNRNPA1 HNRNPA0 ARL3 HNRNPA1 HNRNPH3 EIF4H CIRBP THOC4 HSPA13 RBM14 HNRNPH1 GBP1                                                                                                                                                                                                                                                                                                                                                                                                                                                                                                                                                                                                                                                                                                                                                                    |
| 8150  | biological_process                             | 1.28E-04 | 8.21E-04 | 144 | 160 | 90.0 | 14524 | RALY RPL19 PDLIM7 CTPS RBM3 CHMP4A PITPNB DTYMK LMO7 RANGAP1 FSTL1 EDIL3 TFG/ALK CBX5 HIST1H2BN NUDCD1 SERPINE1 DNAJC8 RBMS2 H2AFZ RPL10 RAB21 HMGCL RPL36AL H1F0 INA PLD3 PABPN1 HNRNPA2B1 AARS MFGE8 CSDA UNC84B PYCR1 KRT18 TAGLN COL1A2 RPS10 TGFB11 STMN1 SRP72 ERC1 FILIP1L GBP1 CAV2 CDV3 HMGB2 PPME1 TAGLN2 PEF1 EIF3A DDX3X RPL5 HIST2H3PS2 CDC42EP3 EMD UAP1 CRIP2 LGALS1 MRC2 PPFIBP1 RPL23A DDX5 SUGT1 RPS6 RBMX HNRNPA1 HNRNPA0 HNRNPH3 ITGA6 EIF4H PCNA CIRBP GOSR2 TMPO DNAJB1 HNRNPH1 DNAJB4 DNAJB6 DUT LIMA1 FAM3C IGFBP7 AP3S1 DEK PSPH ASAH1 YBX1 MTHFD2 MCM7 P4HA2 CHST14 RHOC HIST3H2BB NT5E AP3B1 KHDRBS1 HIST1H1C HIST1H1B CDC2 SF1 SLC3A2 MCM2 PALLD NEXN DAPK3 ARL3 CCDC50 EPB41L2 EIF4G1 HNRNPA1 PFDN1 PDCL3 SMTN RRM2 CTSD THOC4 LEPREL1 FKBP11 KPNA2 FUSIP1 RAB3A SNX18 CNN3 CALD1 RPL27A ASNS TPM1 TPM4 ATXN2L AP3M1 CNN2 CNN1 PAPSS2 FEN1 NES MLTK NASP ELAVL1 ANXA3 TJP1 PHGDH PSAT1 RBM14                                                                           |
| 6259  | DNA metabolic process                          | 6.31E-04 | 3.82E-03 | 12  | 160 | 7.5  | 455   | HMGB2 MCM7 CDC2 NASP RRM2 PCNA MCM2 RBM14 KPNA2 NT5E FEN1 DUT                                                                                                                                                                                                                                                                                                                                                                                                                                                                                                                                                                                                                                                                                                                                                                                                                                                                                                                                       |

|       |                                                                       |          |          |     |     |      |       |                                                                                                                                                                                                                                                                                                                                                                                                                                                                                                                                                                                                                                                                                                                                                                                                                                                                                                                |
|-------|-----------------------------------------------------------------------|----------|----------|-----|-----|------|-------|----------------------------------------------------------------------------------------------------------------------------------------------------------------------------------------------------------------------------------------------------------------------------------------------------------------------------------------------------------------------------------------------------------------------------------------------------------------------------------------------------------------------------------------------------------------------------------------------------------------------------------------------------------------------------------------------------------------------------------------------------------------------------------------------------------------------------------------------------------------------------------------------------------------|
| 44238 | primary metabolic process                                             | 7.13E-04 | 4.08E-03 | 75  | 160 | 46.9 | 6344  | RALY RPL19 CTPS RBM3 DTYMK PITPNB LMO7 PSPH TFG ALK ASAH1 YBX1 MCM7 P4HA2 DNAJC8 RBMS2 CHST14 RPL10 NT5E RPL36AL KHDRBS1 PLD3 PABPN1 CDC2 HNRNPA2B1 AARS SF1 SLC3A2 MCM2 CSDA DAPK3 EIF4G1 HNRPD PYCR1 PFDN1 RRM2 CTSD THOC4 RPS10 LEPREL1 TGFB11 STMN1 SRP72 ERC1 FKBP11 KPNA2 FUSIP1 CAV2 HMGB2 PPME1 RPL27A ASNS EIF3A RPL5 FEN1 UAP1 MLTK NASP ELAVL1 RPL23A DDX5 RPS6 RBMX HNRNPA1 HNRNPA0 HNRNPH3 EIF4H PHGDH PCNA DNAJB1 PSAT1 RBM14 HNRNPH1 DNAJB4 DNAJB6 DUT                                                                                                                                                                                                                                                                                                                                                                                                                                          |
| 7010  | cytoskeleton organization and biogenesis                              | 8.52E-04 | 4.62E-03 | 12  | 160 | 7.5  | 471   | EPB41L2 INA LIMA1 CNN3 LMO7 CNN2 CNN1 STMN1 PALLD KPNA2 DNAJB6 UNC84B                                                                                                                                                                                                                                                                                                                                                                                                                                                                                                                                                                                                                                                                                                                                                                                                                                          |
| 5840  | ribosome                                                              | 9.20E-04 | 4.74E-03 | 10  | 160 | 6.3  | 347   | EIF3A RPL19 RPL27A SF1 RPL10 RPL23A RPL5 RPS10 RPS6 RPL36AL                                                                                                                                                                                                                                                                                                                                                                                                                                                                                                                                                                                                                                                                                                                                                                                                                                                    |
| 5635  | nuclear envelope                                                      | 1.03E-03 | 4.98E-03 | 7   | 160 | 4.4  | 181   | PCNA RANGAP1 TMPO KPNA2 EMD UNC84B CBX5                                                                                                                                                                                                                                                                                                                                                                                                                                                                                                                                                                                                                                                                                                                                                                                                                                                                        |
| 5198  | structural molecule activity                                          | 1.06E-03 | 4.98E-03 | 17  | 160 | 10.6 | 843   | INA NES RPL19 RPL27A RPL23A RPS6 TPM1 TPM4 EPB41L2 EIF3A KRT18 SMTN COL1A2 RPL10 RPS10 RPL5 RPL36AL                                                                                                                                                                                                                                                                                                                                                                                                                                                                                                                                                                                                                                                                                                                                                                                                            |
| 228   | nuclear chromosome                                                    | 1.30E-03 | 5.82E-03 | 5   | 160 | 3.1  | 93    | HMGB2 MCM7 MCM2 UNC84B CBX5                                                                                                                                                                                                                                                                                                                                                                                                                                                                                                                                                                                                                                                                                                                                                                                                                                                                                    |
| 5856  | cytoskeleton                                                          | 1.46E-03 | 6.28E-03 | 20  | 160 | 12.5 | 1106  | INA KIAA1949 NES LIMA1 PDLIM7 CDC2 CALD1 PDLIM5 NEXN PALLD TPM1 TPM4 EPB41L2 SMTN KRT18 CNN2 STMN1 TGFB11 FILIP1L CDC42EP3                                                                                                                                                                                                                                                                                                                                                                                                                                                                                                                                                                                                                                                                                                                                                                                     |
| 15031 | protein transport                                                     | 2.28E-03 | 9.41E-03 | 14  | 160 | 8.8  | 675   | SNX18 RAB3A NASP CHMP4A AP3S1 KRT18 AP3M1 PCNA GOSR2 SRP72 ERC1 KPNA2 RAB21 AP3B1                                                                                                                                                                                                                                                                                                                                                                                                                                                                                                                                                                                                                                                                                                                                                                                                                              |
| 6416  | translation                                                           | 2.41E-03 | 9.48E-03 | 11  | 160 | 6.9  | 463   | EIF3A RPL19 EIF4H AARS RPL27A RPL10 RPL23A RPL5 RPS10 RPS6 RPL36AL                                                                                                                                                                                                                                                                                                                                                                                                                                                                                                                                                                                                                                                                                                                                                                                                                                             |
| 6139  | nucleobase, nucleoside, nucleotide and nucleic acid metabolic process | 2.55E-03 | 9.48E-03 | 38  | 160 | 23.8 | 2785  | FUSIP1 RALY HMGB2 CTPS RBM3 DTYMK YBX1 MCM7 DNAJC8 RBMS2 NT5E FEN1 PABPN1 KHDRBS1 UAP1 CDC2 NASP HNRNPA2B1 AARS SF1 ELAVL1 MCM2 CSDA DDX5 RBMX HNRNPA1 HNRNPA0 EIF4G1 HNRPD HNRNPH3 RRM2 PCNA THOC4 TGFB11 RBM14 HNRNPH1 KPNA2 DUT                                                                                                                                                                                                                                                                                                                                                                                                                                                                                                                                                                                                                                                                             |
| 5634  | nucleus                                                               | 2.58E-03 | 9.48E-03 | 57  | 160 | 35.6 | 4688  | RALY LMO7 LUZP1 RANGAP1 DEK YBX1 CBX5 HIST1H2BN MCM7 RBMS2 H2AFZ HIST3H2BB PABPN1 H1FO KHDRBS1 HIST1H1C CDC2 HIST1H1B HNRNPA2B1 ANP32E SF1 MCM2 CSDA PALLD DAPK3 UNC84B HNRPD THOC4 TGFB11 SRP72 KPNA2 FUSIP1 HMGB2 EIF3A DDX3X RPL5 HIST2H3PS2 EMD FEN1 MLTK NASP ELAVL1 CSR1 RPS6 DDX5 RBMX HNRNPA1 HNRNPA0 HNRNPH3 PCNA CIRBP TMPO DNAJB1 RBM14 HNRNPH1 DNAJB6 DUT                                                                                                                                                                                                                                                                                                                                                                                                                                                                                                                                          |
| 7049  | cell cycle                                                            | 3.02E-03 | 1.07E-02 | 13  | 160 | 8.1  | 621   | KHDRBS1 MLTK CDC2 NASP DTYMK MCM2 SUGT1 UNC84B PFDN1 KRT18 MCM7 STMN1 KPNA2                                                                                                                                                                                                                                                                                                                                                                                                                                                                                                                                                                                                                                                                                                                                                                                                                                    |
| 9628  | response to abiotic stimulus                                          | 4.04E-03 | 1.39E-02 | 6   | 160 | 3.8  | 173   | MLTK CDC2 CIRBP DNAJB4 CSDA FEN1                                                                                                                                                                                                                                                                                                                                                                                                                                                                                                                                                                                                                                                                                                                                                                                                                                                                               |
| 8152  | metabolic process                                                     | 5.41E-03 | 1.80E-02 | 78  | 160 | 48.8 | 7113  | RALY RPL19 CTPS RBM3 DTYMK PITPNB LMO7 PSPH TFG ALK ASAH1 YBX1 MTHFD2 MCM7 P4HA2 DNAJC8 CHST14 RBMS2 RPL10 NT5E HMGC L KHDRBS1 PLD3 PABPN1 CDC2 HNRNPA2B1 AARS SF1 SLC3A2 MCM2 CSDA DAPK3 EIF4G1 HNRPD PYCR1 PFDN1 RRM2 CTSD THOC4 RPS10 LEPREL1 TGFB11 STMN1 SRP72 ERC1 FKBP11 KPNA2 FUSIP1 CAV2 HMGB2 PPME1 RPL27A ASNS EIF3A RPL5 PAPSS2 FEN1 UAP1 MLTK NASP ELAVL1 RPL23A DDX5 RPS6 RBMX HNRNPA1 HNRNPA0 HNRNPH3 EIF4H PHGDH PCNA DNAJB1 PSAT1 RBM14 HNRNPH1 DNAJB4 DNAJB6 DUT                                                                                                                                                                                                                                                                                                                                                                                                                             |
| 5623  | cell                                                                  | 6.59E-03 | 2.12E-02 | 141 | 160 | 88.1 | 14831 | RALY RPL19 PDLIM7 CTPS PDLIM5 CHMP4A PITPNB DTYMK LMO7 RANGAP1 LUZP1 TFG ALK CBX5 HIST1H2BN SERPINE1 RBMS2 H2AFZ RPL10 RAB21 HMGC L FND3B RPL36AL H1FO PABPN1 PLD3 INA HNRNPA2B1 AARS MFGE8 CSDA UNC84B RIC8A PYCR1 KRT18 TAGLN COL1A2 RPS10 TGFB11 STMN1 SRP72 ERC1 FILIP1L GBP1 CAV2 CDV3 HMGB2 PEF1 EIF3A KDELC2 DDX3X RPL5 HIST2H3PS2 CDC42EP3 EMD UAP1 LGALS1 MRC2 PPFIBP1 RPL23A CSR1 DDX5 SUGT1 RPS6 RBMX HNRNPA1 HNRNPA0 HNRNPH3 ITGA6 EIF4H PCNA CIRBP GOSR2 TMPO HSPA13 DNAJB1 HNRNPH1 DNAJB6 DUT LIMA1 AP3S1 DEK ASAH1 YBX1 MTHFD2 MCM7 P4HA2 SDPR CHST14 RHOC HIST3H2BB NT5E GOLGA2 AP3B1 KHDRBS1 KIAA1949 HIST1H1C HIST1H1B CDC2 ANP32E SF1 SLC3A2 MCM2 PALLD NEXN DAPK3 ARL3 CCDC50 EPB41L2 EIF4G1 HNRPD PFDN1 PDCL3 SMTN RRM2 CTSD THOC4 LEPREL1 FKBP11 KPNA2 FUSIP1 RAB3A SNX18 CALD1 RPL27A ASNS TPM1 TPM4 ATXN2L AP3M1 PPP1R12A CNN2 FEN1 NES MLTK NASP ELAVL1 ANXA3 TJP1 GOLPH3 SUMF2 RBM14 |
| 6519  | amino acid and derivative metabolic process                           | 1.47E-02 | 4.57E-02 | 7   | 160 | 4.4  | 295   | PYCR1 CTPS AARS PHGDH ASNS PSAT1 PSPH                                                                                                                                                                                                                                                                                                                                                                                                                                                                                                                                                                                                                                                                                                                                                                                                                                                                          |
| 5794  | Golgi apparatus                                                       | 1.56E-02 | 4.72E-02 | 12  | 160 | 7.5  | 680   | CAV2 AP3M1 GOLPH3 PITPNB CHST14 AP3S1 GOSR2 LEPREL1 ERC1 RAB21 AP3B1 GOLGA2                                                                                                                                                                                                                                                                                                                                                                                                                                                                                                                                                                                                                                                                                                                                                                                                                                    |
